# Supplementary material for: Transcriptome-Wide Annotation of m5C RNA Modifications Using Machine Learning
Source: Front Plant Sci. 2018 Apr 18;9:519. doi: 10.3389/fpls.2018.00519 (PMC5915569; doi:10.3389/fpls.2018.00519)
Supplement: Table S1 — Four benchmark datasets constructed for the prediction of m5C modifications in this study. [file Table1.XLSX]

## Sheet: Sheet1
silique
transcript	position
AT1G55560.1	1056
AT1G09760.1	879
AT3G62170.1	1065
AT3G13400.1	1333
AT1G60740.1	433
AT3G13400.1	755
AT3G42640.1	1436
AT2G26440.1	1323
AT5G48140.1	680
AT1G24520.1	264
AT1G16610.1	681
AT5G26000.1	379
AT5G54095.1	186
AT3G14415.1	910
AT2G47895.1	80
AT4G12960.1	600
AT4G28680.1	830
AT1G61275.1	154
AT1G65970.1	473
AT2G47040.1	838
AT2G07723.1	1417
AT3G14420.1	787
AT5G19580.1	673
AT5G19580.1	267
AT2G16586.1	546
AT2G47030.1	1641
AT3G28750.1	833
AT1G24510.1	585
AT1G20020.1	1216
AT2G47470.1	983
AT2G47470.3	983
AT2G07717.1	1537
AT3G57765.1	692
AT1G10522.1	192
AT5G50030.1	426
AT2G01008.1	1217
AT2G31141.1	362
AT1G15820.1	925
AT2G16586.1	520
AT5G58330.1	727
AT5G24770.1	808
AT5G17920.1	1353
AT3G59540.1	252
AT2G47040.1	1552
AT4G04890.1	1053
AT5G07090.1	143
AT3G48930.1	559
AT3G28750.1	792
AT3G42640.1	170
AT1G10522.1	176
AT3G21055.1	365
AT1G59900.1	1146
AT2G21660.1	350
AT5G13630.1	1421
AT1G31835.1	324
AT5G02380.1	208
AT3G57765.1	690
AT5G01530.1	547
AT2G16586.1	515
AT2G16586.1	514
AT1G49700.1	803
AT1G10522.1	175
AT2G16586.1	513
AT2G27720.1	467
AT3G56825.1	762
AT2G07709.1	1362
AT4G02620.1	269
AT3G05070.1	377
AT1G73030.1	305
AT3G22440.1	154
AT1G19570.1	205
AT2G33040.1	999
AT3G53870.1	712
AT3G15000.1	777
AT3G09840.1	2556
AT3G62870.1	853
AT1G11650.1	1138
AT2G21330.1	1276
AT1G36160.1	352
AT1G55490.1	802
AT1G72970.1	795
AT1G54580.1	629
AT4G38970.1	1030
AT4G38970.2	1012
AT3G18190.1	1497
AT3G48560.1	1328
AT5G05010.1	367
AT5G09810.1	676
AT4G39330.1	709
AT1G29930.1	105
AT3G19820.1	174
AT4G25050.1	509
AT5G24770.1	859
AT3G51950.1	748
AT3G07110.1	523
AT1G06680.1	194
AT4G14270.1	338
AT4G14270.2	332
AT1G15405.1	90
AT5G15200.1	482
AT5G15200.2	482

## Sheet: Sheet2
shoot
transcript	position
AT2G07727.1	90
AT1G09760.1	879
AT3G14415.1	910
AT1G21065.1	611
AT1G61275.1	154
AT1G67870.1	733
AT1G67870.1	661
AT2G07723.1	1417
AT5G35970.1	3010
AT3G06900.1	422
AT5G26000.1	379
AT1G59900.1	1146
AT5G20700.1	946
AT1G67870.1	781
AT1G24510.1	585
AT5G09585.1	633
AT1G29070.1	563
AT5G53902.1	342
AT2G47470.1	983
AT2G47470.3	983
AT1G15405.1	90
AT4G23400.1	210
AT3G15450.1	809
AT2G28550.1	1079
AT2G28550.3	1079
AT1G16610.1	681
AT1G21500.1	407
AT3G57765.1	692
AT5G01530.1	547
AT3G14420.1	787
AT2G05520.1	361
AT5G14320.1	625
AT5G02380.1	208
AT3G47620.1	1159
AT2G16586.1	546
AT1G54410.1	567
AT2G16586.1	540
AT5G61455.1	669
AT2G07717.1	1537
AT3G47620.1	1162
AT3G13920.1	709
AT5G11770.1	657
AT1G74970.1	774
AT1G10522.1	189
AT5G53902.1	532
AT5G53902.1	525
AT4G26110.1	200
AT5G13630.1	1421
AT1G72645.1	285
AT1G31835.1	324
AT4G30950.1	336
AT1G67870.1	517
AT1G20020.1	1216
AT1G29920.1	977
AT4G23420.1	160
AT1G29910.1	95
AT1G01320.1	5624
AT2G20360.1	885
AT2G29630.1	1850
AT4G27430.1	2657
AT1G08115.1	152
AT5G28060.1	525
AT1G60840.1	47
AT1G18540.1	304
AT2G25430.1	2117
AT1G60870.1	611
AT3G27850.1	377
AT2G23090.1	364
AT5G17920.1	1353
AT1G60870.1	608
AT2G07698.1	1320
AT1G72610.1	469
AT3G46780.1	1632
AT1G30380.1	514
AT5G38410.1	559
AT5G46110.1	1622
AT1G15405.1	78
AT3G48560.1	1328
AT2G35750.1	314
AT1G44575.1	728
AT5G53300.1	485
AT4G23100.1	203
AT2G05070.1	703
AT1G49700.1	803
AT1G10522.1	176
AT5G19940.1	781
AT5G53902.1	516
AT2G01021.1	96
AT3G02468.1	1630
AT1G31835.1	561
AT3G13750.1	492
AT3G12120.1	254
AT4G34350.1	89
AT3G01850.1	398
AT3G62030.1	848
AT2G07726.1	118
AT2G01008.1	1217
AT4G14800.1	614
AT1G04400.1	871
AT2G31141.1	338
AT1G72610.1	568
AT1G07610.1	178
AT3G62550.1	614
AT1G64230.1	165
AT2G07708.2	588
AT5G26000.1	520
AT2G31141.1	362

## Sheet: Table S1
Transcript	Position	Class	Dataset	Sequence
AT1G09760.1	879	1	DatasetCV	TCCAATCGTTGTAGCTACTGCTCCAGAATGCTCACAGCAAT
AT2G36120.1	328	1	DatasetCV	GGCGGAGGAGGAGGTGGTGGCCCTGGAGGAGGCTACGGAGG
AT2G36120.1	340	1	DatasetCV	GGTGGTGGCCCTGGAGGAGGCTACGGAGGTGGAAGCGGTGA
AT2G01530.1	545	1	DatasetCV	AGCGTTGTTGCTGACATGGACGAGCATGTTCTCAAAGCCTA
AT1G49600.1	884	1	DatasetCV	TATCGCAACCCCGAAAAGGGCTGCTGCTTACGGCCAACAAA
AT3G12580.1	1521	1	DatasetCV	GCTCAGTGGTATACCACCTGCTCCACGAGGTGTACCGCAGA
AT4G27130.1	554	1	DatasetCV	CGTTCCTAGTCCAGGCTGGGCTTGTGAAGAAAGATAACATC
AT5G54075.1	291	1	DatasetCV	TCGGCTCGGTTCTACCTTGCCGGGGTGGTCGCACGGCGGTC
AT5G58290.1	1004	1	DatasetCV	CATAATGGCAACAAACAGGGCAGACACTCTAGATCCTGCTC
AT5G65050.1	684	1	DatasetCV	ATGGCTCCGGCAACAAAGTACGGGAGACTCTTCCGCTGCTC
AT5G53902.1	516	1	DatasetCV	CGGCTCGGTTTCTACCTTGCCGGGGTGGTCGCACGGCGGTC
AT2G07727.1	90	1	DatasetCV	GCTTGAAAGATTCTTCTTTCCTTTTCGGTGAAAGAGGGCAA
AT5G22440.1	482	1	DatasetCV	TGGTCCTGGTCTCAACAAGGCAGGAAAATTCCCAACTCTTG
AT2G43970.1	1544	1	DatasetCV	CGGCTGGGCAGAGAAAAGGGCGTAACAGAGGTAGAGGAAAG
AT1G78900.1	820	1	DatasetCV	TGCCGATACTCCTCTACTTACGGGGCAGCGTGTTCTTGATG
AT3G62650.1	423	1	DatasetCV	CGATACTGATGGTGCAGGCGCAGGGGAATCTCGTGCACCGC
AT3G44990.1	895	1	DatasetCV	GATGGCGGCATTGACATGGGCACAGAGGAACTTCTTGGTCT
AT3G05840.1	596	1	DatasetCV	TAAAGAAAGTTCTACAAGATCGGAGGTACAAGAATCGTGAG
AT1G10950.1	1163	1	DatasetCV	GGTGGAATGTACTCAAGAAGCGGGGGTAAACATTGGATCAA
AT2G07723.1	1668	1	DatasetCV	TCGGCCCGAGCTGTATGAGGCAGAAACTCGTCCCACGTACG
AT4G32850.1	2587	1	DatasetCV	GGCTATTGACGTGAAGAAAACGGGGGATTTCAACTCAAATT
AT4G32850.8	2599	1	DatasetCV	TGCTATTGACGTGAAGAAAACGGGGGATTTCAACTCAAATT
AT1G44800.1	712	1	DatasetCV	GGAACCATAGCCATTATGGGCAGTATCTCTACATGGGCTGC
AT5G22060.1	916	1	DatasetCV	TTGTCATTCAGCAGAAGGAGCACCCAAAGTTCAAAAGAAAG
AT4G38932.1	589	1	DatasetCV	GACACGTGTTGGCAACGTGGCACTTTTTTTGTCTTAGCCTT
AT2G41220.1	2763	1	DatasetCV	AAGGTTCTCTCTAAGATGGGCATCTCGTTATTCTCTAGTTA
AT5G63400.1	758	1	DatasetCV	TGATTACTACGCAAAGAAGGCCGTTCTCACAAACATCCAGG
AT1G55020.1	2640	1	DatasetCV	AGTGAAGGCGGAGTCACCGGCAGGGGAATTCCAAATAGCGT
AT1G09140.1	794	1	DatasetCV	TGTAGCTATAGTAGCAAGAGCAGGAGTGTGTCACCTGCTAG
AT1G08830.1	728	1	DatasetCV	AACCTATGAGCTTAGTGTGGCTCAAAGCATTTTTAATTCAG
AT3G12490.1	641	1	DatasetCV	TGCTCTTCATCTCAACCACGCGGAGCAACACCATGACTAGT
AT5G04590.1	177	1	DatasetCV	TTAGGAAGATATGGACGCGGCGGCGTCCCGGTTCCTCCTTC
AT4G23400.1	210	1	DatasetCV	ATCTTGGTCTTTCTACAGAGCAGGGATAGCTGAGTTCATAG
AT4G32940.1	1522	1	DatasetCV	AATGGAGCAAATGGAGGAGGCAGCTTCACAGGCTTGTACCA
AT5G03545.1	449	1	DatasetCV	TTTGTTATCCCTCGTTTGGGCAACTTCGATCCTTTGGCAAG
AT5G61530.1	682	1	DatasetCV	TTGAGATCACTGTCCAGCGGCAGGAGTCAAGCAGGCCTATT
AT1G31910.1	818	1	DatasetCV	AAGTTGGGCATGGAAATGGACAGATGTCAAATTAACATCAC
AT3G24503.1	1478	1	DatasetCV	GGTAATTGTCGTGAAAGTGGCATGGACGCTCTCGACAACTA
AT3G28940.1	582	1	DatasetCV	CGATGATCCTCCCACTGCGGCTTGAAGAAGTTGTCAAGATA
AT5G66170.1	567	1	DatasetCV	TCACAGCTTTCCCATCAACACGGAGGAGGAGGAGCCATCTG
AT5G42080.1	2114	1	DatasetCV	GGTGTGGCTCAGACTCGGAGCAGAGATTTAGGGTCTGTAAT
AT1G61740.1	815	1	DatasetCV	CTTCGAGGAAACAAATATGGCGAGGGAATCATATCGATCGA
AT3G16440.1	299	1	DatasetCV	ACGACTACATCGTAGCAGTGCAGGTGACCTATGACAAAATA
AT2G28550.1	1079	1	DatasetCV	GATGGGAAGCTAGGATGGGGCAGTTTCTTGGTAAAAAGGCT
AT2G28550.3	1079	1	DatasetCV	GATGGGAAGCTAGGATGGGGCAGTTTCTTGGTAAAAAGTAT
AT4G01610.1	560	1	DatasetCV	ACATTGTGGTTCTTGCTGGGCATTTGGTGCTGTTGAATCAC
AT1G18270.1	1695	1	DatasetCV	TTCAATGTTATTTCCAACAGCGGTGGAACATCTTGGATGTT
AT4G34180.1	778	1	DatasetCV	ACCGCTGAGATTAGTTGGAGCGGAAGGAGCACCGACAAGAT
AT5G59140.1	196	1	DatasetCV	TTCTCGGAATCGAAAGATGGCGTAGTGACTTTCCCTGATAT
AT3G13300.1	1654	1	DatasetCV	ATAGCATTATCTGAAGCAGGCTTGCTTTTACTTGCAAATGC
AT5G44480.1	1166	1	DatasetCV	AGATTTCTTGCCTCGACGACCGGGAGATTACGCAGAGGTTT
AT1G04400.1	871	1	DatasetCV	GAGATATACTGCGAAAAGGGCAAACCTTTTACGAGTTTCAA
AT1G09430.1	1365	1	DatasetCV	TGGTCCAGAGGCAACAATGACGGGAATATGCAAACGAGCCA
AT3G01850.1	398	1	DatasetCV	TGGGATGAGACCAGGCGTGGCTCTAAAGCCTGGAACACCTG
AT5G65210.1	1524	1	DatasetCV	AGCCTTGAGCTCAAGTTGGGCAACTCGACATCGTGAACCAA
AT2G31390.1	807	1	DatasetCV	GTCACTCTTGGTGAAAAGGGCTGTCGGTATTACACCAAGAC
AT1G59900.1	1146	1	DatasetCV	AGCTAAGGATTGCCCAATGCCAGAGCCTTCTGAGCTCTTTA
AT1G02900.1	359	1	DatasetCV	TGCAGCAAAATTGCTCGTTGCAGGAGTTAGACCTACAAACA
AT1G23870.1	1251	1	DatasetCV	CTTGGTGTTGACGACATGGACATCTTTAAAGGCATAAGCCT
AT2G02960.1	363	1	DatasetCV	AGCCCTTGTGCTTGCAGTGGCAGCCTAAAGTATGCTCATAG
AT3G05070.1	377	1	DatasetCV	GGACCCATTTGTTAACATCGCTCCAAAGAAGCCAAACTGGG
AT3G12290.1	937	1	DatasetCV	TGTAGGCCCAATGACAGTGGCAATGCTTCTCAGGAACACCG
AT1G54630.1	526	1	DatasetCV	GGAGCTCTTGTTGGAAAAGGCCAAGTAGAAAATCCTTTACT
AT2G02960.1	630	1	DatasetCV	TATACAGCTTCAAGTGCAAGCGGGGCCGCATTCTGTCGCTC
AT3G28950.1	356	1	DatasetCV	GATGCTGAGTTAAATAATTTCGATGTGATTGAAGGTAATGA
AT1G74030.1	1225	1	DatasetCV	GAAGGTTAACCAGATTGGGACAGTCACTGAGTCAATTCAAG
AT2G34250.1	1261	1	DatasetCV	AGCAAGTTTCTCTGACATGGCAGCTCACCCGTTCCATGCAC
AT4G16760.1	1740	1	DatasetCV	CTTGGCTGATTTGGTTGAGGCCGCTATTGCTCATTGCCAAT
AT2G45980.1	841	1	DatasetCV	ATCAGTAGCGAGAAACTGGGCAGAGTACTTGAACCTCTCTC
AT1G78600.1	926	1	DatasetCV	GGGAGGTGAGACATCATGGGCGGTTCCACAGATTCAGTCTC
AT1G13110.1	655	1	DatasetCV	TGCGAGTTCGTAGACGAGGACAACGTTGCTGATCTAGTTAA
AT2G30050.1	792	1	DatasetCV	GGTCCGTGATGTGGCTTGGGCACCAAACTTGGGTCTCCCCA
AT5G44790.1	3020	1	DatasetCV	AGTGTCAATCCCGATAGCAGCAGGAGTGTTTTTCCCGGTTC
AT1G05260.1	521	1	DatasetCV	CGGGAGGATATCAAACGCAGCGGAGGCATTAGCCAACATTC
AT1G01780.1	827	1	DatasetCV	TGATTGAATGAATGTTGTTGCGGGGGAAAGATTTGATTTCA
AT1G11260.1	1665	1	DatasetCV	GGGAATGCGCTTGAGATGGGCAAGAACAGTAACCAAGCTGG
AT3G11130.1	4961	1	DatasetCV	TTCTCGTCTACTTCATTGAACAGGGGAAAAAGGAATGCTTT
AT3G09840.1	1860	1	DatasetCV	TCGTGAAATCTTCGACAAGGCCCGTCAATCCGCTCCATGTG
AT5G64370.1	883	1	DatasetCV	AGCTTTTGGTCTAAATGGTGCAGAGATTGTCTTCAACCCTT
AT2G46370.1	1431	1	DatasetCV	CCCCAACTAAAATTCATATGCAGGAGAAACCTGATTCTCTC
AT1G65930.1	818	1	DatasetCV	CTGCTTATGAGAAAAAGTGGCCACTTTACCTTAGCACAAAG
AT1G48300.1	388	1	DatasetCV	GAGCTCTTTAAGAAACAAGGCTAAACCGGTTCTTGAGCCGT
AT2G37550.1	234	1	DatasetCV	CCAGAAGAATCCACAATGGGCATCGATTTCATATGGAATCT
AT3G13920.1	1512	1	DatasetCV	GGTTTTCTTGTTTTGCAAGGCACTCTTTGATCTGATTTTGA
AT3G22380.1	4919	1	DatasetCV	CGTGGATCAGAAGCAACAGGCGGGTGAGTGAAAGATCTTTA
AT3G22380.2	4919	1	DatasetCV	CGTGGATCAGAAGCAACAGGCGGCTTGTGCTGGCGAGACGA
AT1G14670.1	957	1	DatasetCV	GCTGCATCGCTCGGTAGTGGCACTCAATTGTTCACGCTCAC
AT1G34370.1	1100	1	DatasetCV	GTTGCAAACGTAACAAGGAGCACAAAAAGTTCCAGCCTTTG
AT3G10500.1	1547	1	DatasetCV	GTACCCGTTACTAAAGAAGGCAAGCCACATGTTGGGTGCTA
AT1G59870.1	4483	1	DatasetCV	TGACTTTATGGGACCAGTGGCGGCTGTACTCATCGCTTTCA
AT1G03220.1	1278	1	DatasetCV	TTTAGTTCCACGTTATTGGGCCGTCAAACTAACTGCGCCAA
AT3G57530.1	1548	1	DatasetCV	GTACACCTAAGGAAAATGGGCAATGACGAGCATCTCAAGAA
AT4G40060.1	1381	1	DatasetCV	ATTAACGATGTCGAGAGGGGCTTTCACAGAAATAGGAATCA
AT3G03150.1	420	1	DatasetCV	ACTGAGCACAGCGCCACCGCCGAGGGTGCACACCAGGACAC
AT5G61820.1	312	1	DatasetCV	GAAGTGGTTGACGAAGCGGGCAAACCCGTTCCTCTACACGA
AT2G33040.1	999	1	DatasetCV	GGACAGCTCAAGCAGAAACGCAGGAGAAATGCTCGACCGTC
AT1G17860.1	94	1	DatasetCV	TGGCCGTCTTCATCAGCCACCGTGGAGTCACCACCGAAGCA
AT1G31770.1	486	1	DatasetCV	ACCACTCTTCTATCAGCTCTCGGGGGCCGTCTCTCCAAAAC
AT2G27830.1	659	1	DatasetCV	TCGAAGACCGAAAACGTTACCGGAGTTATTCTCCACCGGTC
AT3G13330.1	5158	1	DatasetCV	CAATCCAAAAGAGAAGAAATCGGAGGAAATCAAGTTCAACT
AT4G39940.1	499	1	DatasetCV	AAAGCATTGTTTGAAAGAGGCAAACTTACTTACACACTCGA
AT4G15610.1	595	1	DatasetCV	TTGCCGTCATGTTGGAGGAGCAATCGCCGTCTCATTGTTTG
AT5G45500.1	635	1	DatasetCV	ATTGCTGCTTGAAAATGTGGCAAAAGAGCAGAAGAAAAACC
AT5G60360.1	813	1	DatasetCV	TACATCAAATCCAACGGTGGCCTCGACACAGAGAAAGCTTA
AT5G22090.1	1155	1	DatasetCV	TGGGCTTCTCTATAAGATGGCACAAAAGCCCATTCCTATAA
AT3G47470.1	948	1	DatasetCV	ACAATGTGACTGGAAAAGGACCATTTGAGAATCTGTTGCAG
AT1G64230.1	276	1	DatasetCV	TCTGATAGTCCTTATTCAGGCGGTGTCTTTCTCGTAACCAT
AT2G44380.1	822	1	DatasetCV	ATTTATGGGATAGTCCAAAGCGGAGATATTATTATTGATCG
AT1G15750.1	3422	1	DatasetCV	TTTGCAGTTGGTCTCTCAGACGGGGGAGTGCACATATTCGA
AT3G15450.1	809	1	DatasetCV	AGGAAGTGAAGCTAACTGGGCGCTGGCTAATTCTCGTTGAT
AT1G30400.1	4156	1	DatasetCV	CTGGGAATCTCTTGAGAGGGCACACTTGAAAGATACTATCC
AT2G19680.1	403	1	DatasetCV	TGCGCAGGTGAAATCGTCGGCAGAGGATTCACTTTCACCGG
AT2G20580.1	1381	1	DatasetCV	AATGCTGGTTTTGGTCAGGACAAACTAATGACAGTACCTTC
AT3G16420.1	243	1	DatasetCV	TTGATTATGTCAAGAACGGACAACCCGAACAAGCTCCTCTT
AT1G15130.1	1032	1	DatasetCV	TAATGGCAATTTGGATAGGGCTGTCAAGGAAAACGACAGAG
AT3G63460.1	3262	1	DatasetCV	ATCTCCAAGAATGCTGCGGACAAACTCGCACAGCTATGCCA
AT1G77750.1	454	1	DatasetCV	AACGCTCGCACCAAAAAGGGCAAAGCCGTTGCGATTGCAGG
AT5G20885.1	556	1	DatasetCV	GAAGAACGAACCTAGCTGGGCCGTTGAACGGCTTCTCTACC
AT2G27600.1	739	1	DatasetCV	AAAATCGTATTTGGCTAAGGCTGTTGCCACTGAAGCTGACT
AT3G02468.1	1630	1	DatasetCV	AGCAGCGAGGACGAGAAGGACGAGGGAATCTAGCAGAATTT
AT3G22380.1	1283	1	DatasetCV	AGCAGCCGGTAACGATTTGACGGAGGCAGCGAAATCAACTG
AT4G09750.1	793	1	DatasetCV	CTCAATGCACCCTGGCTGGGCTGAGACACCAGGTGTTGCCA
AT3G59540.1	252	1	DatasetCV	TGTCTTCGACCAAGAGAAGGCCGATAAGTTGAAGCAGTCTC
AT4G29010.1	1844	1	DatasetCV	ACAGAGCTTCTTCTTAAGAGCGGGCGAAATGGAAAAATCAA
AT5G23540.1	614	1	DatasetCV	CACAGACCATTATGCTTGGGCAGGAACCCCGTCAAACAACA
AT3G61430.1	341	1	DatasetCV	TTCATGGTCTTTTTGGAGAGCTGGGATCGCTGAGTTCATCG
AT4G34450.1	784	1	DatasetCV	AAATTGGTTGGTAGCTTGACCAGGGGATCTGTCCGCTCTCC
AT5G65950.1	3220	1	DatasetCV	AAGCTCTGCAAATCTTGCGCCAGGGGAAGAGTTCAAAAAGG
AT1G48920.1	1573	1	DatasetCV	GGTGGTGGATTTGGAAGGGGCAATGGTCGTTTCGGTAGTGG
AT1G79010.1	291	1	DatasetCV	ACTGGAATACTGTCTTTGAACGGAGCATAAACACCCTGTTC
AT2G14170.1	765	1	DatasetCV	CCATTAGGTGTTTGTGCTGGCATTTGTCCTTTTAACTTTCC
AT4G20390.1	525	1	DatasetCV	GCAATCATCGCAGCATTCGCCGGAGTCATTCTAATGCTCCT
AT5G03240.1	1174	1	DatasetCV	TTTATGTACCTTCGTTTGGGCTTGTAACGGGCCTTTGTATT
AT4G05050.1	653	1	DatasetCV	AAGATCCAGGACAAGGAAGGCATTCCTCCGGACCAGCAGCG
AT4G05050.4	372	1	DatasetCV	AAGATCCAAGATAAGGAGGGCATTCCTCCGGACCAGCAGCG
AT1G22530.1	1739	1	DatasetCV	ACATCGCCAAGGACAAGGAGCAAGATGGTCCTTTCTGGTCC
AT3G13460.1	1806	1	DatasetCV	TCTCGGTCAATGCAAGTGGACAATTTGTTGGTCTTGCTGAA
AT3G13460.3	1784	1	DatasetCV	TCGGTGTCAATGCAAGTGGACAATTTGTTGGTCTTGCTGAA
AT2G24940.1	341	1	DatasetCV	GCTAAGTATCCTGTCGTTGGCCGTGTTGTCTCTTAGGTCTC
AT4G32330.1	539	1	DatasetCV	ATCAAAAAGAGCAAAGAGGGCAAAAGTGCAGATGCTAAAGT
AT5G13180.1	434	1	DatasetCV	ACTCTTGTCTTCTACAAAGGCAAACCACCTCATGGCTCAAG
AT3G52360.1	474	1	DatasetCV	ATCGAATTCGAAGATGGCGGCAACTATTTGACTTTAAGGTT
AT1G30900.1	1452	1	DatasetCV	TGGTCTGAAACCAAAAAGGGCTTAACTTTCTCGGCTTGCTC
AT2G47000.1	3973	1	DatasetCV	ACGTTGATCAATATCAAAGACGGAGTTTATGCTTCGTTAGT
AT5G48020.1	744	1	DatasetCV	CATTTACATCACTCATGAAGCAGGGTCCTCATCTTCTTGCT
AT5G14120.1	1432	1	DatasetCV	AGATTTCACTCTAACGCAGGCACTGGTGAAAGCCGACTTCT
AT1G50920.1	1934	1	DatasetCV	TATCAAGATCTCAGTCGAGGCCTCCTGCACATGAAGTTGTG
AT3G13750.1	947	1	DatasetCV	ATTATCAATGCTTGCAATGGCTTCTACTGTGATTACTTCTC
AT2G45620.1	1356	1	DatasetCV	AATGGTTAAAATGTATATGGCATGTCGAAATGACATCCACA
AT4G33090.1	265	1	DatasetCV	CTCCTCTAAGGCGCTTGCAGCTCCAAAAGTTGTCTTGTTTG
AT1G25490.1	1550	1	DatasetCV	GGAGTTTGGTCCTGAATGGGCAATGCAGCACTTAGTTCCCC
AT2G43910.1	538	1	DatasetCV	GGAGATGAGACCTGCATGGGCTAAATCTATGTATGAACTCT
AT3G28860.1	3887	1	DatasetCV	TTGGTGTGATTCAAGACGGGCGGATTGTGGAGCAAGGCAGC
AT1G14740.1	1685	1	DatasetCV	GGAAGTGATGATGCAAAAGGCAAAGCATTGCATCTTAAAGC
AT3G10410.1	1640	1	DatasetCV	TGCATGAAAACAAAAGGCAGCAAACATAAAACAATGTGTGA
AT1G17470.1	276	1	DatasetCV	CCAAAAGGTGCTAGTGGAGGCGGGGAAGGTTTTGAAGTTAC
AT2G32730.1	1538	1	DatasetCV	CTTATTCATGCTAACCATGGCGAGGGAATCAAGCAATTTCT
AT4G11420.1	2795	1	DatasetCV	AGCAGCAGCAGCAGCAGCAGCAGGAGCACCAGCAGCACCTT
AT1G20693.1	655	1	DatasetCV	GGTAGCATTAGTATAGATGGCTGCAAAAATCTCTCTGTTTT
AT3G43300.1	3170	1	DatasetCV	ACGTATCCGAATGGTCTGGGCAAGAATATGGTCTGTCCTTG
AT2G25850.1	1655	1	DatasetCV	TTTCTCATGTTCGAAGACGGCAGCTTCCATCTTTTGTTTTT
AT3G52590.1	198	1	DatasetCV	GGAAAGCAGCTCGAAGATGGCCGTACTTTGGCTGACTACAA
AT1G21630.1	2773	1	DatasetCV	CTCAGATGCTGACTCTAAAACGGGGAAAAAGCAAAGCAGTG
AT2G14720.1	1841	1	DatasetCV	AGCTATGAGTGCTCTTGTAGCGGGGACCTTCTCTACATGAG
AT5G19550.1	1159	1	DatasetCV	ATGGCTGACCGTATAAAGAGCATGCGCCAACAGTTATTTGA
AT2G16950.1	2651	1	DatasetCV	AGTTGGCATGAAATAAGAAGCGAGGATGTCCAGACCGAAGT
AT3G24160.1	476	1	DatasetCV	TTGGGCAATGCCATAAGGAGCAGTATTAAGTCTGATTCGTA
AT5G08560.1	1379	1	DatasetCV	GTTCACATGTATGAAAAAGGCGGTATCAGTCCCATTTCTTG
AT3G01290.1	878	1	DatasetCV	AGGCGCCGTCTCTGACGTGGCAGCGCAGATTCGAAATGGAT
AT1G33050.1	1414	1	DatasetCV	GCAACAAATCTCAAGGTCAGCGGAGATTGAATCCATTGGCC
AT3G24670.1	369	1	DatasetCV	GGATTCGGTCGTAACGCTATCGGAGGACGAGATGGTCGTTA
AT1G64230.1	165	1	DatasetCV	AAAAGGATCTTGAAAGAGCTCAAGGATCTCCAGAAGGATCC
AT1G67870.1	661	1	DatasetCV	GAATGGAGCACCAGGGCGGGCACGGAATGCAGCACCAGGAC
AT2G31400.1	850	1	DatasetCV	GAGAGAGGAGAAAGAACGAGCAGGGGAAGTTAGCTAGTGCT
AT1G09640.1	586	1	DatasetCV	GATCTCTACGTTGAAGAGAGCACTTGATGCTCTGAACACAC
AT2G19110.1	1627	1	DatasetCV	ATTGAAGTTGATACCAAAGGCGGGAAGACTGTTGGATACGT
AT5G64240.1	1208	1	DatasetCV	GACTTATAGCTTCATAAAGGCGGTGAAGACAGCTGGACCAG
AT2G41650.1	224	1	DatasetCV	AGCTGGAGAGGCGTATGGAGCAGCCCTAATATGTCTCTGTT
AT5G57625.1	624	1	DatasetCV	CCACCGGGTAACTACGTTGGCGAGAAGCCATACTAAAAAAA
AT2G37940.1	1333	1	DatasetCV	GGATAACACAATGAATGGCGCGTGAAAAGATCTAATTATAT
AT3G52140.1	4060	1	DatasetCV	CAGAGGTTTTGATGAAAGAGCAGCTCGTGCTGCAGCTGAAG
AT2G46520.1	1896	1	DatasetCV	GAGGTTGCTGGACCTTGCATCGGGGGATTGACCTCTATTCT
AT3G60330.1	1357	1	DatasetCV	GTTGTCAGACCCGAAAGAGGCACGTGCCGGGATTAAAGAAC
AT4G17140.1	11522	1	DatasetCV	TGCCCATGGGGTAGGACGGGCGTTCCTAGGATTTATTGTAC
AT4G15610.1	548	1	DatasetCV	AACAAAGAAGTTAGATGGGGCAAAATCTGTCATATCTACGA
AT2G21870.1	881	1	DatasetCV	TGATTTGTTGTAAGAAAAGGCAAAGATCTCTCACTTGATTG
AT1G70290.1	2541	1	DatasetCV	ATCCGAGAAATGGTAGAACGCGGGGAGCCACCGGAAATGGT
AT2G01010.1	577	1	DatasetCV	GCAAGTCTGGTGCCAGCAGCCGCGGTAATTCCAGCTCCAAT
AT5G05270.1	634	1	DatasetCV	CATTTCTCAGCCAAAGATGGCATTTGCGAGATCGGGTTTGA
AT5G43940.1	242	1	DatasetCV	GACGCTTACACTTGGAGCGGCAAGGATCCTGAAGGTCTCTT
AT2G23930.1	333	1	DatasetCV	GAAGCTCTTGAACCAGTGGGCAGATCTTCTTAGCTCGTTAT
AT1G67870.1	733	1	DatasetCV	GAATGCAGCACCAGGGCGGGCACGAAATGCAGCATCAGGGC
AT2G22680.1	1050	1	DatasetCV	GTTGCTGTTTTAGACGTAAGCGGGAGAAATTCCGGTGGGAA
AT3G27570.1	665	1	DatasetCV	TTCTTATGGAGAAGTTCGAGCAGGAGATAAGTTCACGTGGA
AT5G43780.1	442	1	DatasetCV	TCGTTCCGGCTCGAAGACGGCTCCGTCGTCAACATGTCGGT
AT2G28910.1	996	1	DatasetCV	AAGATGATAGAAGACAGAAGCGGAGGAACAAAGTCGCAGCT
AT5G45500.1	2063	1	DatasetCV	TATTGGGATCTTGGAAAGGGCTGCAACCATGTTCCGTAAGG
AT3G28345.1	2573	1	DatasetCV	TGAAAGTAGCAAACTAGCGGCAGAGGCAGTTTCCAACGTCC
AT5G08560.1	1419	1	DatasetCV	GCGGATGGTATCCTGATGGGCAGGGGATAATCGCCGGGATG
AT2G41900.1	682	1	DatasetCV	GCTGACGTGAACCGTGCTTGCGGGAATGATCAGACCACTGC
AT5G58950.1	1741	1	DatasetCV	ATGGGAAATGGTAGCTGGAGCAATCCCATATGAGGACATGA
AT2G16720.1	311	1	DatasetCV	CAAGTGGTCTTTGATTGCGGCGAGATTACCTGGAAGAACAG
AT3G02780.1	353	1	DatasetCV	CAAGAATTTGCTGCACAGGGCTTTTAGTGTATTTTTATTCA
AT4G38620.1	465	1	DatasetCV	GCCGGACTTCTTCGCTGTGGCAAGAGCTGCCGTCTCCGGTG
AT5G49360.1	1579	1	DatasetCV	ATTAGATCAGTCGATAGAGGCAGAGACACGAGATCGAACCG
AT2G30210.1	1732	1	DatasetCV	ACAGTTGCAATCGGTGCAGGCTCCACCATTGGATCTTCCAA
AT1G28330.1	541	1	DatasetCV	TATCAGAGTGGATAAAGTGACGGGGAATGTTTTTCTTTTGT
AT1G08110.1	504	1	DatasetCV	CGTTGATGATGTGCACAAGGCATGCGAGAGATTTGAAGAAT
AT5G12310.1	1026	1	DatasetCV	AGGAAGGCGTGCAAAGAGGGCAATGAAGCGTGAAGCTGCAA
AT3G24170.1	1313	1	DatasetCV	ACCTGTTGCGTTAATGGAGGCCACCTGTTTTGCGAACACTG
AT1G12410.1	896	1	DatasetCV	TCCTCGCCAAGACGAAAGCGCAGGGCTAGGCTAGTCTTTTT
AT4G19860.1	505	1	DatasetCV	TTCCTCAAGACAGAGCTGGGCTACATGCAATTGATGTCTTA
AT2G36880.1	1349	1	DatasetCV	CTAGACAGAAACAAAGCTGGCAATTGCAAGAACTGAGTTGA
AT1G80070.1	3808	1	DatasetCV	TATTTGAGAATCGTGTGAGGCAGATCCTCATGTCATCAGGA
AT5G04740.1	906	1	DatasetCV	TTCACGTAAGCTACCAAGGGCAAGCTCTAAACAGATCTTTG
AT2G45170.1	462	1	DatasetCV	CTTTACATCACTTACAGTGGCGAGAACACATTCGGTGCTTC
AT1G04430.1	1438	1	DatasetCV	TGCTGATCCTGATGCGGTTGCGGGTGTTTCAATGGAAGCTT
AT4G21710.1	1361	1	DatasetCV	CAAAAGTGCGTTGACAATGGCAAAGAAGTCAATCTTCAATT
AT3G61198.1	172	1	DatasetCV	TCGGCTCGGTTCTACCTTGCCGGGGTGGTTGCACGGCGGTC
AT1G27770.1	2475	1	DatasetCV	GATATTGGACTCGCAATGGGCATTTCCGGAACTGAGGTGGC
AT1G14740.1	625	1	DatasetCV	AAACGATTTCACGGCGACGGCGCCGTCGATGTCTTACTCTT
AT3G51310.1	2124	1	DatasetCV	TGTGCTTTGCCTGAAGAGGGCACAAAGGATTGCAGATGCTG
AT1G20840.1	1745	1	DatasetCV	TCCTCAGATTCTCGAACGGGCTGGCGTAGATATTCTTCTTT
AT5G19390.1	940	1	DatasetCV	GTTCAAGAATATGAACAGGGCAAAACGGAGTTCACTTTTGA
AT1G50030.1	843	1	DatasetCV	TTTGGGGCACCTTGCTCGGGCAGGTGGAGCAATGACTTCTG
AT5G14880.1	1874	1	DatasetCV	TGACCTCATTTGCAGTATCGCGGAGTTTATCCGTTCAGATA
AT4G33580.1	1059	1	DatasetCV	AGAGGTAAGAAGAAGGAAGGCAGTGGAATCGCTGTTAAAGA
AT2G04780.1	985	1	DatasetCV	AGTTGCTGATTCTGAAGGAGCTTCTTCACCAAAGTCCTCAC
AT1G74920.1	1016	1	DatasetCV	TGATAAAGCTGCTGAATGGGCTCTTTTCGGTTGCTTCTGGA
AT1G56450.1	318	1	DatasetCV	CATTCTCTTCTTGGTGCCAGCGGAGAAATCAGCGACTTTCA
AT3G24180.1	2277	1	DatasetCV	TACAACATACATGACACAAGCAGGTGGAAGGATCTGAACCC
AT5G20250.1	904	1	DatasetCV	TTGGAGAGTGGTGACGTGGACACTAAACGGTCGTCGTTTAC
AT5G07350.1	1424	1	DatasetCV	ATCAGATCTCCAAAAATGGGCAACCCACGTAGAGAAGAGAA
AT2G27860.1	333	1	DatasetCV	TGAAGGTCTTGTTAAGATGGCGGATCTGATTATAAATCTTG
AT3G10500.1	1698	1	DatasetCV	ATATCAGACAGCAACATGGGCTGGTCATACGGCAAAAACGA
AT4G17340.1	347	1	DatasetCV	CTCGGTCTCGCCGTCGGTGGCAACATCACAGTAATAACCGG
AT2G30490.1	1482	1	DatasetCV	ATCACCATTGGTAGGATGGTCCAGAACTTCGAGCTTCTTCC
AT2G38040.1	1549	1	DatasetCV	ATTGGAGTGTTCATAGAGGGCGAACCAATAGAGCCAAGTAG
AT1G53300.1	939	1	DatasetCV	AAGTAGTAGTACTGTTGCTACGGGAGAGACTCCTATATGGA
AT2G35630.1	185	1	DatasetCV	TGAGAAGTTATTGAAGGAGGCGAAAAAACTTCCTTGGGAGG
AT5G53350.1	770	1	DatasetCV	ATCATCACAGAAACGGTCTGCGGGAGAAACAGATAGCACTG
AT3G14680.1	1028	1	DatasetCV	AGTTGTTCTATTTGGCCGGGCAAGAGACAACATCAGTACTT
AT3G05165.1	1372	1	DatasetCV	TTTTACATATTTGCGGCTGTCGGAGGAATGTCATTCATTTT
AT4G05320.2	700	1	DatasetCV	GGAAAACAACTTGAAGATGGCAGAACTTTGGCCGACTACAA
AT1G77530.1	999	1	DatasetCV	TCGTGTAACACCGTGTTGGGCATGGACTTGTTGATGTTAAC
AT3G50260.1	437	1	DatasetCV	TCAAGTAGATGCGATAGGGGCGACGGTGGTGCAGAACAACA
AT1G65930.1	1233	1	DatasetCV	TCGTGGACTTGCACACAGGGCTAAGTTAGATGACAACGCAA
AT4G39260.1	366	1	DatasetCV	TGTCATCACCGTGAACGAGGCTCAGTCGAGAGGTAGCGGCG
AT4G39260.3	309	1	DatasetCV	TGTCATCACCGTGAACGAGGCTCAGTCGAGAGGTAGCGGTG
AT2G31390.1	587	1	DatasetCV	AGTGGCGAAAGAAGCAGGAGCTCTTCTTTCCTATGACCCAA
AT5G23540.1	647	1	DatasetCV	AAACAACATCGAACCTTGGGCACTTGAACAAACCATCGATC
AT4G21960.1	897	1	DatasetCV	TACGTGCGTAACGACCGTGGCACCCCCATGGTGCTAGACAA
AT5G17920.1	2061	1	DatasetCV	TGCTTTCTACTTGGACTGGGCCGTCCACTCCTTCAGAATCA
AT3G52850.1	1338	1	DatasetCV	AGGTAAATTGGAAAAGGGGGCAGTGCTTAAGGCTATGTGTT
AT2G02960.1	889	1	DatasetCV	CGTTGGTGCTTCAGTCAGGGCAGCCTAGAACAGTTCACTTC
AT2G07708.2	588	1	DatasetCV	AAACAAAAAGTTCAATATGGCGGGAGATCCATAATTTTATT
AT2G34420.1	366	1	DatasetCV	AGTTATCCACAGCAGATGGGCCATGCTCGGAGCCCTAGGCT
AT1G43710.1	1152	1	DatasetCV	TCATGGGAAGTCGTAACGGGCATGCTCCTTTGTTCCTCTGG
AT1G65270.1	999	1	DatasetCV	GCACAAGTGCAACCAGCTGCCAGGAGAAGATGATTCCACTT
AT5G13420.1	1389	1	DatasetCV	CGGTACACTGCAAGACAAGGCCAACACTCTCAAACTAGCCA
AT2G46620.1	1517	1	DatasetCV	TGGTTCGAGAAAGTCGACGTCGGAGGATGTTTCTGATGATA
AT4G23100.1	1031	1	DatasetCV	TTTACAACCTATAGCAACGGCTCTATTTGCGAATTCCCCTT
AT4G00355.1	578	1	DatasetCV	CTGGACGATGAAAGAGCTATCGGTGGCTCACACGTGTATGA
AT2G07726.1	118	1	DatasetCV	CCGATCTTCCTAGTGATATGCGGGACAAACATTGTTATAAG
AT3G56150.1	895	1	DatasetCV	GCTGCTCGTGGAAAAAAGGGCACTGCTCGATTTGAGCTAGT
AT4G37180.1	392	1	DatasetCV	ATTCGATGATGTTGAAAGGGCAAAACCGGAAACTGATAAGA
AT3G09860.1	218	1	DatasetCV	GGGTTAATCCTTACATGTGGCAGCTCTCTAACCAGTTCAAT
AT5G02050.1	750	1	DatasetCV	GGATGAGAATTTGCAGAAGGCTTTCCACAGGTACTTGGAGA
AT1G35160.1	357	1	DatasetCV	ATGACCATGTGACCACGATCCGTGATTACAGAAGCAAGATC
AT1G30400.1	3598	1	DatasetCV	CGTCATGCAGAACGGAAAGGCAGCGAACCAACAAGCATATG
AT1G21110.1	718	1	DatasetCV	CCAGACTGGATTCACAATCGCGGTGGTGAAGAAGGCTCTTG
AT2G01008.1	1217	1	DatasetCV	TCTCGCCTAGGTTGGATGGGCGTGCTTCGTTGGAAAGCATG
AT2G36830.1	743	1	DatasetCV	TGGGCCGGACCTCTCGTCGGCGGTGGAATCGCTGGACTCAT
AT1G48860.1	1286	1	DatasetCV	AGAGAACAGTGTGACTGTGACAGGGCCGTCTAGAGATGCTT
AT2G18960.1	2100	1	DatasetCV	TCGTCCTCACGGAACCTGGGCTGAGTGTCATCATCAGTGCC
AT5G28020.1	1013	1	DatasetCV	GTAGAAAGTCCGGTACTTAGCGGAGGTCAACCAGGTCCACA
AT5G45510.1	3823	1	DatasetCV	AATGCTGATCATAAAAGAGGCTGGAGCAAGATCTACTTACA
AT5G35200.1	821	1	DatasetCV	TGACTGTCAGCCTGAAGGGGCAGCTGTTCAAAACCACATTA
AT5G28020.1	1231	1	DatasetCV	TGCAAAGCGGCCAGAAAACGCGGGGAAACTCATTGTGGTGG
AT4G12600.1	530	1	DatasetCV	TCTCTCCATTTATGAAGAGGCTTGGACTGAAGTGAGTTTAT
AT1G51760.1	812	1	DatasetCV	TTTTTCAAAGCTAAGATAAGCGGGAAAGGAGGCCACGCAGC
AT3G58560.1	611	1	DatasetCV	AGTGCTTTTCGGATGCGTGGCAACATCACCGTGTGTTGCAT
AT2G37410.1	479	1	DatasetCV	TCTGTCTATGCGGCAAGGGGCTGGTGCTGCTTCGAGATCAG
AT5G48000.1	400	1	DatasetCV	AGAGGATGTTAAAGTACGGGCCATTGTTTCGGACAAATATT
AT2G30950.1	1418	1	DatasetCV	CGCTAACCTCTTGAATGAGGCTGCTATATTGGCCGGAAGGC
AT1G67280.1	842	1	DatasetCV	TGTTGGTGATCTCGATAGGGCCATAAAGTTCTATGAGAAGG
AT4G39090.1	1308	1	DatasetCV	ACTTTGGTGATTTGTATGAGCGAGCTCTCTTTGCGCTGCTG
AT5G10450.1	615	1	DatasetCV	CACCTACTCATCCGATAAGGCTTGGTCTGGCCCTGAATTTC
AT5G61780.1	1963	1	DatasetCV	CATTGCAGACCTGACTGTGGCCTCGGCCAAGAAGGCTAAAG
AT5G04870.1	592	1	DatasetCV	TATTGCAAGTGAAGCTGTTTCGGGAGAGCTTCGATCTCGAT
AT2G44790.1	428	1	DatasetCV	CACTGCAGAACCAATGGCGGCATGAAGCTAGCCGTTAATGT
AT4G27320.1	1066	1	DatasetCV	TGAAACAAAACGGATTTGTGCAGAGGAGTGTGTTTGTGTGT
AT5G07370.1	750	1	DatasetCV	CGGGCTCGATGTAGATGGAGCGAGATTGACTCTGAGGAAGT
AT3G48140.1	350	1	DatasetCV	AACCTGAAATCATGCCTGGACTCAACAAGTTCTTCACTGAT
AT4G21110.1	547	1	DatasetCV	TGTCAAGGATGCGCGAGTGGCGATTAAATTCAACATAGCTT
AT4G24190.1	285	1	DatasetCV	GAAGACGCTTCGCAGTAACGCGGAGAAGTTTGAGTTCCAAG
AT4G32850.1	718	1	DatasetCV	TTGATACTTTGTGTGTTGGGCCATCTTATGTTAACCGGGAG
AT2G22430.1	898	1	DatasetCV	TCTTCTTCCATTAAAGGCGGCGGCTTCTTCATTCGCCGCCG
AT4G25100.1	605	1	DatasetCV	CAGTTTGGAGCTGGCTGGGCCTGGCTTGCTTATTCAAATGA
AT4G30170.1	548	1	DatasetCV	TGGCAGAATCTCCACGAAGGCCAGCGTTCAAAGCCAATTGC
AT1G15405.1	3	1	DatasetCV	NNNNNNNNNNNNNNNNNNAACGTGGGCTTGTGACCCGTGTG
AT5G01500.1	528	1	DatasetCV	CACATGGTGTTCGAGCTGGGCAACAAAGTGCTAAGAAGGCT
AT2G16586.1	270	1	DatasetCV	CGGATTCGTCCGTCTTCTTTCTTCTTAGCCGAGTACTTCGG
AT2G20630.1	467	1	DatasetCV	TCTTTGATGGTCACTTAGGGCATGATGTAGCCAAGTACTTG
AT2G33830.1	284	1	DatasetCV	ATCGCCACTAGAGGAATGGGCACAAACCTCTTCGACAAGCC
AT1G54410.1	567	1	DatasetCV	TCTTAGAGAGAGGTTAAAGACAGGAGAACCGTGCATCTATC
AT3G15950.1	850	1	DatasetCV	ATATGCTAGATGAGATCGAACGGGAGTTTGAAGCTGCTACA
AT1G79030.1	1444	1	DatasetCV	ATTTGACGTCTCAGAATGGGCCATTTGTCAGGGAATGGCTT
AT5G08670.1	570	1	DatasetCV	GAACCTATTGACGAAAGAGGCGAAATTAAGACCGAACATTA
AT5G47480.1	3349	1	DatasetCV	TGGAAAGAGGTGTGGAACCCCCAGCTGAGGAAGCTGCACTA
AT3G19820.1	448	1	DatasetCV	AGCCTCTTGTTAACATGGGACAGATTTCCCGTGCTACCGTC
AT5G61780.1	2679	1	DatasetCV	CAATGATTGTTAATGGACCTCGAGGAGCAGTTCAATCTCCA
AT5G57940.1	2055	1	DatasetCV	GGAAGAGCTTCTGACATGGGCATTGGATCCAAAATCAGGTG
AT3G57450.1	217	1	DatasetCV	GACAACCATCACCATCACGGCGGAGTCAAAGATTTAATCGG
AT3G54850.1	1557	1	DatasetCV	GAGGAAGGAACCCGAAGAGGCAAAAAAGATGCTGCTACAGC
AT1G70850.1	721	1	DatasetCV	CTGCACGAAGGTGACTGGGGCACAGTCGGCTCTATCGTCTT
AT3G53420.1	633	1	DatasetCV	TAAAGTGTCGTTACCTAGGGCCCTATTGTACATAATCGCTC
AT3G03780.1	934	1	DatasetCV	AAGTCAGGTTTCCCACAGGGCAAGTACCTCTTTGCTGGTGT
AT1G47900.1	2354	1	DatasetCV	TGGATGTGTCCACAACGAGCCAGGGGTTCCATGTGATGAAA
AT3G54040.1	437	1	DatasetCV	GTCAGACTCCTTGATGGAGGCAGGTTTCGCCGCTAAGCTTT
AT5G64340.1	1999	1	DatasetCV	TTTTAGCTGTATATAGTGGACTACTTTTAAGTATTATATAT
AT1G79230.1	880	1	DatasetCV	CCAGCCACATCTAGTGTGGACACTTGATCAGGTCAAGAACA
AT3G24503.1	583	1	DatasetCV	TATGTTTGCCACAAAGGTGGCTCCGGCTATGGCTGCTGGTT
AT2G18960.1	930	1	DatasetCV	ACAGCACTAACCAAGTTGGGCACTTCCAGAAAGTTCTTACA
AT3G04720.1	607	1	DatasetCV	TACCAATTTGTCGACTGTGGCAATGAGCTCATTGGGCAGCC
AT5G05960.1	227	1	DatasetCV	CTCGAGTGAAACAGATGGGGCAGAATCCAAAATGCCTTTGT
AT1G51650.1	226	1	DatasetCV	CTTCTCTCTCTCCAAATGGGCTGATGGAAAGCCCCAGAAAC
AT2G47730.1	1532	1	DatasetCV	AGGTTATTGACCTCCAGAAGCAGTAGTGACCCTCTCTCTTT
AT1G51200.1	295	1	DatasetCV	ATATGTTGTTCCAACAGGAGCAGGGCGCTAAGTTTGCATCT
AT1G34030.1	591	1	DatasetCV	GATTGGATCTTTGATAAGGACTGAATTTTAAATTTTGTTGT
AT3G09260.1	1480	1	DatasetCV	TGTTGGATAACTTCGAGTGGCAAGATGGTTACAAAAACAGA
AT2G21620.1	352	1	DatasetCV	CAAACACGCTTTTGATTGGGCTCTTGTTCATTTCTGTCGTC
AT2G20630.1	1011	1	DatasetCV	CATAAAAGATCCACAAGCGGCAGCCAAGGAGTTGATAGAAG
AT1G01620.2	226	1	DatasetCV	CGGACAAAGACTACAAGGAGCGAGCTGAGTTCGTGGTCCTT
AT2G07708.1	385	1	DatasetCV	AGCAAAATTCAACGAACCGACGGGCGTCCCGGACATAGCCT
AT3G48990.1	360	1	DatasetCV	GTTGAACGCAGCGTACACGGCGGAGGAATTTGAGTTTTACC
AT4G16720.1	241	1	DatasetCV	GGTTACAAGGCCAAGCAGGGCTTTGTTGTGTACCGTGTACG
AT1G76200.1	229	1	DatasetCV	GTTCTGGATTCTGTACAGGGCAAAGCAAGATGGTCCTGTAG
AT3G14990.1	1334	1	DatasetCV	TGGCTTGAATAAAAAGAAGGCTTTGCCTTTTAGTTATCTCT
AT1G48300.1	353	1	DatasetCV	GATAGTGATTGTGATAAAGGCAAAGTTGTGGACATGAGCTC
AT1G78850.1	1055	1	DatasetCV	CTTGTCCTAGCGACAAAGGGCTTCTTGGTTGGGACGAGACA
AT2G47730.1	1509	1	DatasetCV	CTCTGCCAGGCCTGCTTGGGCTAAGGTTATTGACCTCCAGA
AT2G01140.1	1243	1	DatasetCV	GAAGGCACTGTTGGTGAGGGCAAAGGCCAACTCACTGGCCC
AT5G64740.1	2601	1	DatasetCV	TTAGAAAATATCGAAGAGGGCCGCGTCACTAAAGGTTCTAA
AT3G20050.1	1501	1	DatasetCV	TATTGATTATACCAAAGGTGCTTGCAGTAAACGCTGCTAAG
AT1G03220.1	551	1	DatasetCV	TAAAGGAACCGTTGGTATGGCGGGAATGGGACGTCACAACA
AT1G11910.1	1300	1	DatasetCV	GGATCCAGAGCCAGTTGAGGCAAAACATGACTCAAGAGCGC
AT1G48598.1	1180	1	DatasetCV	TGATCTCTTTCGCACTGGAGCGGGCCATTGGACTCAAATGC
AT4G20110.1	953	1	DatasetCV	GCTCAGATACTCGAAAAAGGCGGTTATACCGCGTTTACGCC
AT3G09840.1	2556	1	DatasetCV	TGCCACGTCTGCAGCCGCTGCTGGGGACGATGATGATCTCT
AT2G21160.1	424	1	DatasetCV	AGGTGTGATGGGAATTAGGGCCAGCGTTCATCTTCCTTATG
AT5G61820.1	870	1	DatasetCV	GTGAGATGGGTTGATTGGGACAGCTCGGTTTTGCCCGCTAA
AT2G05220.1	494	1	DatasetCV	CGAGCCACAACAAGCTATGGCACCAATCGCTGCTTTCGGCG
AT4G30190.1	416	1	DatasetCV	ATGGTAGGCCTCCGGATTGGCAGGATTTTGTTGGTATTATC
AT5G18255.1	197	1	DatasetCV	TTTACTCGGCGCTGTGATGGCTATTGCGAGCTTTAACACCC
AT1G78850.1	1069	1	DatasetCV	AAAGGGCTTCTTGGTTGGGACGAGACATGTAAATCTCCAAG
AT5G20290.1	708	1	DatasetCV	AAGATCCAGAAGAAGAAGGGCAAGGGTGCTGCTTAGAGTCT
AT2G07719.1	542	1	DatasetCV	CCGAATAAAATGACAGTGGGCTCCCAGATTACTTAGCACAC
AT3G09270.1	605	1	DatasetCV	AGGCGTCACGATCATGACCGCGGAGGAGTTTCCAAAACTTC
AT3G58680.1	255	1	DatasetCV	CAATGCTGGATCGAACAAGGCTGCATCAAGCGGCACCTCCT
AT2G01021.1	96	1	DatasetCV	GGTGGCGGCCTAAGCCCGGGCTTTTGANNNNNNNNNNNNNN
AT5G53300.1	344	1	DatasetCV	ATTCAAGCCTCCTAAGGTGGCCTTTAGGACCAAGGTGTTCC
AT5G10360.1	605	1	DatasetCV	ACCTTCACAAACAAGAAGGGCAAGAAGGTTAGCAAGGCTCC
AT5G10360.2	449	1	DatasetCV	TTGGTCATTGTGAAGAAGGGCAAGAAGGTTAGCAAGGCTCC
AT5G13930.1	307	1	DatasetCV	GAAACGTCACATGCATCTGACGGAGGAATTCCTCAAGGAAA
AT5G17330.1	1239	1	DatasetCV	TTCAACATCGTCTCAAAGGACGAGGGAGTGCCACTTGTCGC
AT2G47610.1	300	1	DatasetCV	GGCAAAAGAGGATCCTGAAGCAGAGGTTGAAGGTCCCTCCA
AT5G27700.1	329	1	DatasetCV	GTGGTGTCGACAGGTTGTGGCAGAAGAAGAAGGTTGAAGCC
AT1G78900.1	1160	1	DatasetCV	GAATATTTTAGAGATATGGGCTACAATGTTAGTATGATGGC
AT4G30190.1	2947	1	DatasetCV	TCAGTCGTGAAGCTAAAGGGCTTGGACATTGAAACTCCCAG
AT4G35100.1	924	1	DatasetCV	ACGCAACCAATTAATGAAGGCTTTTTTTAAGATAATGTCAA
AT2G01010.1	459	1	DatasetCV	CAAATTACCCAATCCTGACACGGGGAGGTAGTGACAATAAA
AT3G09740.1	566	1	DatasetCV	CTGATGGGACAGCAGGTGGCCCTAAAAGCACTAGTGCTTGG
AT3G53990.1	535	1	DatasetCV	CAAAGGATAATAATGGGAAGCGTGAGCAGCTTTGTGATCCA
AT5G53460.1	1845	1	DatasetCV	CTTCCGATGGCTAAAGATGGCTCTGAAGCACTTGGTTCTAT
AT3G17810.1	864	1	DatasetCV	AGCTACAGTTCCTGTATGGGCTAAGATGACTCCTAATATTA
AT1G24510.1	585	1	DatasetCV	ATTGCCCAAAAGTTTGAATTCGATGTTAATAATTATGAGCC
AT2G36170.1	426	1	DatasetCV	GCCATAGCAACCAGTTGAGGCCAAAGAAGAAGATCAAGTGA
AT1G15690.1	1825	1	DatasetCV	TGGTGCCTTTGTGAGCCGTGCAGGGATCCACACCGTAGATG
AT3G48990.1	1492	1	DatasetCV	ACTACTGTAACCGAAGAGGACATTAAAGCGTTTTGTAAGAA
AT2G23540.1	443	1	DatasetCV	GGAGGAATCATGAATGCCACCGGGAGAATCTTTGTGAATAG
AT2G32240.1	447	1	DatasetCV	ACATGAATCACAAGAAAAGGCAAAAGAACTAGAGCTCGAAT
AT1G31835.1	324	1	DatasetCV	GGATAGATCCACAGGTGAAGCGGATTGATTCCTCTGCTTTC
AT2G20630.1	840	1	DatasetCV	ACAACTAGCGGTTGCTAGGGCGTTTGGAGATAAGAGCTTAA
AT3G08580.1	631	1	DatasetCV	TAACTTGGCATCTGGAGGAGCAGCTGGTGCCTCTTCCCTTC
AT3G08590.1	1540	1	DatasetCV	GAGGACATGGTTAAAAGGGACAAATCCGGCAAGCCTGCTCT
AT4G34110.1	1944	1	DatasetCV	GTGCCTCCATATGATATGGGCAACAACATGCCATTGACTAT
AT4G36648.1	482	1	DatasetCV	TGACAGGTGCGCTTGCATGGCAGGTCACCAAAATCCTTAAT
AT4G39090.1	864	1	DatasetCV	TATCCTTACACCGGAAAGGACGGCAAGACCTGCAAGCTAGA
AT1G80460.1	1727	1	DatasetCV	AGTGGCGTCTTGGTGCAAAGCGGTGGAAAGAACATTTGATC
AT2G31610.1	661	1	DatasetCV	AAGATCATGCTTGACTGGGACCCTACGGGCAAATCAGGACC
AT1G11840.1	740	1	DatasetCV	GTGACTGAGTACACAAAGGGCAATGCATATGCACAGATTGC
AT1G11840.5	948	1	DatasetCV	GTGACTGAGTACACAAAGGGCAATGCATATGCACAGGCACA
AT5G17920.1	1353	1	DatasetCV	GGCTTCAAGGAGATCTTCCCCAAGAGTCACCAACGAGGGTG
AT1G56070.1	2606	1	DatasetCV	GAGGAAGGGATTGAAGGAAGCGATGACTCCACTATCTGAGT
AT5G21940.1	506	1	DatasetCV	GTCTTTTACTAATTTAACGGCGGAGGCAGCTTCGGCGTTGA
AT3G10985.1	717	1	DatasetCV	TGTTTTAAACGCGGTGTGGGCTTCTGGGGCTACGGTCGCGT
AT3G16430.1	231	1	DatasetCV	TCGATTACGTCAAGAACGGACAAACCGAACAAACTCCTCTT
AT4G34050.1	363	1	DatasetCV	GCCAAGAACACAATGGAGATCGGAGTTTACACTGGCTACTC
AT2G20360.1	885	1	DatasetCV	TGCTGCTGCGATTGTTGCTGCTCTAAAGGATGATGGCTCCA
AT4G23650.1	305	1	DatasetCV	GGTCGTGAGCTTGGTCGTGGCCAGTTTGGTGTCACGTACCT
AT3G18780.1	1407	1	DatasetCV	CAAGGCCGAGTATGATGAGGCAGGTCCAGGAATCGTTCACA
AT1G22530.1	967	1	DatasetCV	CTCTACTCAGGTCAAGAGGGCCTCAAAATTTATTAAAGATA
AT3G09630.1	1207	1	DatasetCV	TTGGCAATCAAAGCAGCAGGCAAGTCGTGGTACAAGACTAT
AT5G14120.1	1774	1	DatasetCV	CGGATACGGTGCACACTGGGCTATTGTCCCAGCTACTGCCT
AT1G77940.1	214	1	DatasetCV	GTTCTCAAATCCCTCCGTGGCTCCAAAGGGAAACTGATTCT
AT5G44790.1	1707	1	DatasetCV	GAGGTTGATTCACCAGTAATCGGGGGTACTATTAATATGCA
AT2G19730.1	259	1	DatasetCV	ATCCAGGCCGCTGACAAGGACCAAGCTGTTGTGCTCGCCAC
AT1G11650.1	870	1	DatasetCV	TTCATACCAGAGCTCTGCTGCAGGGGTAACAACTGATAATG
AT3G22200.1	1175	1	DatasetCV	TCTTATGAGCCAAGAAGTGGCAGATGTCATAAATTCTCATA
AT2G27860.1	677	1	DatasetCV	CTGAGGGTGCTGAGAATGGGCTTGAGTTCACCATCGTACGA
AT5G20250.1	1384	1	DatasetCV	GCGATAACGGGTTATTGGGGCGGAGTTAGACCCGGGGAAGA
AT2G17500.1	974	1	DatasetCV	TTTTCGGTGCAGTAAGATGGCTCAGAAATCTTATCATAGGT
AT3G56800.1	632	1	DatasetCV	GTTTTAGAACCAAACAATGGCTCTATAAACTTGGTTTGCAT
AT1G73330.1	501	1	DatasetCV	TTCCAGATCCATCGAGTCGACGGAGGTGCTTACAAGATTGT
AT2G07709.1	3721	1	DatasetCV	CCCCACTGACTCGGCCCGGGCCTAAGTTAAAGTGAAGTGGT
AT2G37110.1	771	1	DatasetCV	GTGCCCTTTGCCAAGAAGGGCGTGAGCTCCGCAGGAAGGTT
AT5G62700.1	1195	1	DatasetCV	ACCTACTGGTCTGAAGATGGCTTCCACTTTCATTGGAAACT
AT1G62380.1	725	1	DatasetCV	GCCCACACTGATGCAGGAGGCATCATCTTGTTGTTTCAAGA
AT5G42980.1	496	1	DatasetCV	TCATTGCCAATCTCGAGAAGCACAAGACAGTTGTTGCTGCT
AT4G34700.1	153	1	DatasetCV	TAAGGATACTCTCAATTGGGCTGTTCATCGCCATATCTTCT
AT2G24200.1	791	1	DatasetCV	TGAGGAAGCAGCAAAGGTGGCTTCTACGTACAGTGATGTCT
AT4G37410.1	907	1	DatasetCV	TTGCTCTCTTTGCAACAGGACGACCCTGAGTACTACACTGA
AT1G02840.1	709	1	DatasetCV	AGGATTCTAGGAGTCCTAGCCGGGGAAGATCCTATTCTAAG
AT5G04590.1	1149	1	DatasetCV	GTAGTCACACAGCGAGAACACGGGAGACGAGATGATCGTAA
AT5G01600.1	884	1	DatasetCV	CAAGTGAGGAAGAGAGAGGGCATGCTGAGAAGTTTATGGAG
AT2G45960.1	952	1	DatasetCV	GGTTGGACCATTCATTGGTGCTGCACTTGCTGCTCTCTACC
AT3G08530.1	4756	1	DatasetCV	TGCTTATATCTACAAGAAAGCGGGCAGATGGAAGCAATCAA
AT2G01008.1	785	1	DatasetCV	TCGTCGCCGAAGAGAATGGGCGTGTCATGCATGGGCTGACA
AT5G56980.1	1064	1	DatasetCV	TTCGGCGACGGCGAAGATGGCGTCGACGCGAAAGCTTCAGA
AT1G57720.1	266	1	DatasetCV	TCCGCAGACTTTCAGATGGGCGTCACTAACAAGTCACCTGA
AT1G79040.1	285	1	DatasetCV	GACGCCTCCGGCAGAAAGGGCAAGGGATACGGTGTTTACAA
AT2G39770.1	825	1	DatasetCV	GGTTTTGGATGGACATTGGGCAACCCCGTGACTACATAACG
AT2G27860.1	909	1	DatasetCV	GATTGAAAACCCAGAGAGGGCAAATGGGCACATCTTCAACG
AT4G12040.1	751	1	DatasetCV	GGCTAATCCTTTGGTTAAGGCGGATAAAGTTCAGAGGATTT
AT3G23430.1	747	1	DatasetCV	AGGAGCAAAACAAAAGGAGGCAAACCAAAAATGTCTCTCCG
AT1G57720.1	972	1	DatasetCV	TTCTCGATGACTGGAAGAGGCTTTACTCGAACACCAAATCC
AT5G63400.1	591	1	DatasetCV	TGGATCCACCCATCGAGTGGCAGGAGTTACCACACCAAATT
AT2G17720.1	703	1	DatasetCV	TTCTTCACTACCAAGTTGGGCAGAAGTATGAGCCTCACTAT
AT3G14940.1	1185	1	DatasetCV	GCACTGATGAATTCCGTGTGCGGGCGGATGAACTGCACAGG
AT4G21960.1	910	1	DatasetCV	ACCGTGGCACCCCCATGGTGCTAGACAACAATTACTACCGT
AT4G11320.1	1098	1	DatasetCV	GGCTGGCTACATGAAGATGGCTCGCAACATTGCCAATCCAA
AT3G11340.1	1006	1	DatasetCV	GGGTAAAATAGTGAAATGGGCACCTCAGCCTGAAGTTTTAG
AT5G47030.1	640	1	DatasetCV	CACAACAGATCTTGAGAAAGCAGAGGCACAGATTGGTGTTG
AT4G39090.1	867	1	DatasetCV	CCTTACACCGGAAAGGACGGCAAGACCTGCAAGCTAGACAA
AT3G09630.1	258	1	DatasetCV	ATACGCCGTATCGAAGAAGGCCGGTCACCAGACCTCCGCCG
AT1G32230.1	633	1	DatasetCV	ATGTGCCCCCACCGAACGGGCAGTGCCAAATTCCTGACAAA
AT4G35830.1	2582	1	DatasetCV	CATACCTTTGTGCTTCAAGGCGGGAGAAGATGCTGAGACCC
AT5G42300.1	293	1	DatasetCV	GACTATGAGATCCATGACGGCATGGGTCTTGAGCTTTACTA
AT5G09810.1	1201	1	DatasetCV	AGAAAATACAGTGTCTGGATCGGAGGATCAATCCTTGCATC
AT3G11400.1	907	1	DatasetCV	GATCAGAAAACTGGAGTGAGCAGAGGATTTGGTTTCGTCAA
AT1G49240.1	1307	1	DatasetCV	TAAGGCAGAGTATGATGAAGCAGGTCCAGGCATTGTCCACA
AT1G35720.1	515	1	DatasetCV	AAGAAGTCTCTTGAAGAGGACGTTGCTCACCACACTACCGG
AT1G65970.1	557	1	DatasetCV	CGAGTTCACGGTTTCCAGCGCAGAGGATATTCTCAAGGCTC
AT4G38470.1	796	1	DatasetCV	CTCCGGAAAAGGAAAATGGGCAAACAGGTGCCAGAACGCAT
AT2G18960.1	1390	1	DatasetCV	GCTTGCTGATCCGAAAGAGGCCCGAGCTGGAATCAGAGAGG
AT1G69510.1	309	1	DatasetCV	TTTTGACTCAGCTGATTGGGCTTTAGGCAAGCAAAAAGGAC
AT1G26880.1	329	1	DatasetCV	CAGGGAAAGGATCATTCGGGCATTCCTTGTCGAAGAGCAAA
AT1G26880.2	415	1	DatasetCV	TTCCGACAGGATCATTCGGGCATTCCTTGTCGAAGAGCAAA
AT4G23670.1	428	1	DatasetCV	TGGATGGTCACGTGATGGAGCATCTCAAAGTATTTGATATC
AT2G17420.1	946	1	DatasetCV	CTACGAAGTTTTTGGATGGGCAGCTTGAGCTTGATGAAGAT
AT2G33220.1	324	1	DatasetCV	ATGTACCAAGTTGGTCAGGGCAACAAAATCCGCAGGGCGTT
AT3G30775.1	1195	1	DatasetCV	GTCTAGCGAAGCTAGCTTGGCGGATTCCCTGGGTTGCAAGT
AT3G04730.1	565	1	DatasetCV	TATGTGAAGGTTAGCATGGACGGTGCACCGTACCTACGGAA
AT1G07140.1	423	1	DatasetCV	AATCACTTCGTTAAATCGGGCATGAGTGTTCAGGAACACGT
AT5G66040.1	333	1	DatasetCV	TCTTCTCCATGCAGGTTTCACGGGAGTCAAAGATATCGTCG
AT5G02380.1	208	1	DatasetCV	TCTTGTCCTCGGTGTTGCTCCGGCGATGAACTCTCAGTACG
AT2G32240.1	1014	1	DatasetCV	AGCTGCCTTAAAGAGTAGTGCGGGAGAATTAGCTGCAGTGC
AT5G27770.1	409	1	DatasetCV	GTGATTGCGGCGAACAAGGACCGTAACCTCTATGAGTTGAG
AT3G16400.1	868	1	DatasetCV	AAGATTTACTCCTTTGGTGGCGAGTTCACACCAAATCAGCC
AT4G10840.1	1815	1	DatasetCV	AGCTTTTGAAGGAAGCTGGGCGGTCGCGGAACTACAAAGCC
AT1G12110.1	1052	1	DatasetCV	AGCAATAAGGGATCAGGAAGCGGGAGTTACCTCGAATGTAT
AT3G27240.1	421	1	DatasetCV	ATGCTTCGATCCGTCGTGGGCATCAAGTTTATCAGCAAGTC
AT3G14310.1	1163	1	DatasetCV	CATCACTTTCCAAAACACGGCGGGTCCGTCGAAGCACCAAG
AT1G56340.1	439	1	DatasetCV	CTTACAGCATTATGTTTGGGCCAGATATTTGTGGCTACAGC
AT5G19510.1	581	1	DatasetCV	CATGAAGAAACTGGAAGAGGCTGTTCGTGGTGTTGAGATGC
AT3G16420.1	278	1	DatasetCV	CCTCTTCGTGGTACCAAAGGCCGTGTTCTCCCAGCTGATCC
AT2G18040.1	370	1	DatasetCV	GGCGAATTTCGAAGAAGTGGCGACTCGTGTTTCTGACTGTA
AT1G22440.1	1110	1	DatasetCV	AGAGGCAGAACTGTATGCGGCACTTTATTTGGCGGTTTGAA
AT3G56800.1	600	1	DatasetCV	GTTTGTTAAGGTCATGATGGCTAAGTGATGCTGTTTTAGAA
AT1G17860.1	626	1	DatasetCV	AAAGGTTATGTTCAAAAGAGCATACTAGAAGATGATAAAAC
AT2G07719.1	592	1	DatasetCV	AGAGTGCTCCAGGAACTGGGCAAAAAGACCTAGAACTACGG
AT2G05710.1	1361	1	DatasetCV	GCTGTCCCTAGCTGACAGGGCGACAATTGCCAATATGTCTC
AT5G63600.1	992	1	DatasetCV	AGAGCGAAGTCTGATAAGGACAAATTGAGGATTTCTTGGCC
AT3G58680.1	489	1	DatasetCV	CCTTTCAAAGCTGGAGAGGGCACTTGGTGCTAAACTCCGTG
AT1G63940.1	631	1	DatasetCV	GCAAACACTCACCACAGACGCAGGGAAGCAGTTAAAATATG
AT5G19760.1	815	1	DatasetCV	TTCTGGGTTCTGCGCTGCGGCTTGCAGTCTGCCATTTGACT
AT3G15450.1	659	1	DatasetCV	ATGTATGTTTCATAGTGAGACAGGGCTTAAGAGCTTTGACC
AT2G30490.1	1196	1	DatasetCV	GACTCTTCGTCTGAGAATGGCGATTCCTCTCCTCGTGCCTC
AT3G44110.1	1443	1	DatasetCV	CGGGTGGTGCTCAAAGGGTGCAATGTGCCCAGCAGTAAGTA
AT3G24503.1	464	1	DatasetCV	GCAGCAGATAAAATCCACGGCGAGACTCTTAAAATGACGCG
AT1G74840.1	318	1	DatasetCV	CCCGGCCGGTTACGCCTCGGCGGATGAAGCTCTTCCCATGT
AT2G07708.1	990	1	DatasetCV	ACCTAAGAAAGAGTTGTCAACGGGCGAGTGTCCTGCTATAA
AT5G20250.1	2530	1	DatasetCV	ATGGAAGTTAAAGGATGTGGCAAATTCGGATCTTACTCTTC
AT4G35310.1	1470	1	DatasetCV	GCAATGGATACTGATAACAGCGGGGCAATCACATTTGATGA
AT4G37410.1	1517	1	DatasetCV	TGGCTATGCGTATGATGGTGCCGTTACGAGCCTTGTGTAAG
AT3G17390.1	1384	1	DatasetCV	CCACTCAAGTCTAACAAGGTCCAAGCTTGAAACCTGTCAGC
AT4G39200.1	252	1	DatasetCV	AGAAGGTGAACAACATGGTGCTGTTTGATCAAGCTACTTAT
AT4G24690.1	2234	1	DatasetCV	AACAATGGAAGCATCAAAGGCGTGGTAATGGATCTCCTCAC
AT4G33090.1	2453	1	DatasetCV	TATATAGGAAACACATGGGGCTCCGGATTTCTCATAACACG
AT2G07731.1	254	1	DatasetCV	TGGTTTGATGGTTGCACGTGCTAAAAATCCGGTACATTCCG
AT1G21100.1	1048	1	DatasetCV	ATTAGTCACTCCTGATGAGGCAGAGAATGGTGACATCAATG
AT5G23900.1	634	1	DatasetCV	TGGTGCCAGAGCCAAGAGGGCTGCCGAGGCTGAGAAAGAAG
AT3G02360.1	721	1	DatasetCV	GTGACTTATATCGGTAAGGGCGGGTCTGGAAACTTTGTCAA
AT5G55190.1	625	1	DatasetCV	TACCTTGCTAGAAAGCTCGCCGGGGACGCTAATCTTCACTT
AT2G36880.1	1139	1	DatasetCV	TGACACCTACAAGACCGGGACCATCCCAGACAAGGATATCC
AT3G21770.1	539	1	DatasetCV	CGGTAGGATCTCAAATAAGACGGAGGCTACTAATAACATTC
AT1G14320.1	572	1	DatasetCV	ATTGTCAGCAGGAAATGGGGCTTCACGAAGTTTAACAGAGC
AT2G07708.1	994	1	DatasetCV	AAGAAAGAGTTGTCAACGGGCGAGTGTCCTGCTATAAGGTA
AT1G12110.1	320	1	DatasetCV	TTTAGGCAATGCAACTGCGGCTAACACCGTTACCAATTTCC
AT2G24360.1	861	1	DatasetCV	AGAGAACAGCCCAGAAAAGGCACAGTTCATGGAACAACAGT
AT5G11670.1	354	1	DatasetCV	GTTACCTCTGTCGCTAGTGGCTACACATTGATGCGTGATCC
AT2G31570.1	435	1	DatasetCV	TGTGAACGGTAAGAACACGGCACCATTATACAAGTACTTGA
AT5G02870.1	1251	1	DatasetCV	TCGATAACTTCACCAAGTGGCTTGGCGCTAGTCAGTAATGA
AT3G04720.1	623	1	DatasetCV	GTGGCAATGAGCTCATTGGGCAGCCTGATTCCAGAAACATG
AT5G09220.1	454	1	DatasetCV	ACCGGCGATGCAGTGTCTGGCAAGAGAAACTACACTTACAT
AT1G07940.1	1624	1	DatasetCV	GGGTTCTTGATCGGAGGTGGCGGAGGTACTTGGCACTCGAG
AT2G07811.1	936	1	DatasetCV	ATTGTTTGCCCCAATGATGGCCTTTTTGATCTTATTCGTAT
AT1G01620.1	923	1	DatasetCV	GGTCGGACCATTCATTGGAGCAGCTCTTGCGGCTCTTTACC
AT5G60390.1	1480	1	DatasetCV	GGTTCTTAAAACTTTGATGGCGTTTGAGCCTTTTTCTTTTT
AT2G21870.1	397	1	DatasetCV	GAAGACCATCAGGCAAAAGGCAGACATGTTCTCAGAATCTC
AT5G66040.1	283	1	DatasetCV	ATCATTGTTGGCTGCCAGAGCGGTGGTAGATCTATCAAAGC
AT2G44790.1	350	1	DatasetCV	GAGAACCATTCCGATGGAGACACCAAAATCGATCTTAAGAC
AT1G72370.1	207	1	DatasetCV	ATTGCAATTACCAGATGGAGCGTTACGTCTTCAAGAGACGC
AT3G53870.1	712	1	DatasetCV	TTCTCCTAAAGAAGAAGAGGCCATCTATGCACCTGCTCAGG
AT5G18255.1	188	1	DatasetCV	GCGCACGATTTTACTCGGCGCTGTGATGGCTATTGCGAGCT
AT5G05170.1	938	1	DatasetCV	TGCTGAATGACGAAGCGAGGCAGCCTCTGTCAAGGAAAGTT
AT2G15620.1	740	1	DatasetCV	AGGAGATTGTTGACACGAGGCCTTACACGAATCTCCTTTCG
AT1G15690.1	1872	1	DatasetCV	CCCCTAAAGTTATCATTGGGCTCCTTGTTGGTGCCATGCTT
AT4G11260.1	892	1	DatasetCV	CCCTTGAATATGGTAAAGGGCAAAGTGTTTTGCCCAAACCC
AT3G54040.1	477	1	DatasetCV	TGCTCATCCGCTTGCTTGGACTATTGCCCTAACATTCTTGA
AT1G56340.1	252	1	DatasetCV	GGTATCCAAACTAGCGAGGACTACAGATTCTACGCTATATC
AT3G61440.1	918	1	DatasetCV	AGCAACATACTCAACGGTGGCAAACCAGGTCCACATGCTAT
AT3G59970.1	1832	1	DatasetCV	GATTTGGTCAAGAAGCTGGGCTAACTTGTACCCAGAAGATG
AT1G11910.1	1746	1	DatasetCV	AGTCGTAGTAGAAATGGTGGCGCAGTTCCTTTTAAGTTGTT
AT5G34850.1	1385	1	DatasetCV	GTGCGGTATAACGTGTCAAGCGGAGATCGTTACCCAGTTCC
AT3G48140.1	252	1	DatasetCV	ATGCACCAAGGAGAACAGGGCTGCTGGAATTTTGGATAACC
AT2G07711.1	544	1	DatasetCV	TTATGCCCCGACGGTGGGGCCTTATGGGGAAGGGCCCAGCC
AT2G37170.1	552	1	DatasetCV	GCCAACTCTCTAGCAGACGGCTACAACACAGGCACCGGACT
AT3G09440.1	1091	1	DatasetCV	CTTCGTGATGCTAAGATGGACAAGAACTCAATCGATGATGT
AT2G36830.1	295	1	DatasetCV	CGTCGCTGTCTCAGTTGGTGCCAACATCTCTGGTGGACACG
AT5G50920.1	1031	1	DatasetCV	CGTGTGGTGCAAATTCTTGGCAGGAGAACCAAGAACAACCC
AT2G25450.1	773	1	DatasetCV	GAGCCAAACCGAACATTCGGCGGCGCTCAGCACACAGACAG
AT5G44550.1	465	1	DatasetCV	AACAAACACGCGAGATGGGACAAAATCTGTGATAGATTCGC
AT4G26230.1	174	1	DatasetCV	CTGTACCTTTAAGAAGAAGGCTCCAAAGGCGATCAAGGAGA
AT5G53300.1	485	1	DatasetCV	TTTGTTAACCGATCCAAACCCGGATGATCCTTTGGTGCCCG
AT5G22440.1	303	1	DatasetCV	ATTTGCATGCTTGGTGATGCCCAGCACGTCGAAGAGGCTGA
AT5G43780.1	363	1	DatasetCV	TGTGCTTAGCGAAGGCTGGGCAAGTCCTCTCAAAGGTTTCA
AT5G26360.1	1115	1	DatasetCV	TGAACAGGCCCGACGAACTGCAGGAGTCTGATATCGGTACT
AT3G04840.1	695	1	DatasetCV	ATTGAGAAGGCAACTCAGGGCATCTACCCTCTTCAGAATGT
AT1G02305.1	1013	1	DatasetCV	CATGCTGTTAAACTTATTGGCTGGGGAACTTCTGATGACGG
AT5G02500.1	2058	1	DatasetCV	GGACCTAAGATCGAGGAGGTCGACTAATTTGTTGGACATTG
AT2G01010.1	435	1	DatasetCV	CATCCAAGGAAGGCAGCAGGCGCGCAAATTACCCAATCCTG
AT1G50010.1	390	1	DatasetCV	TGTGATCGATGAGGTCAGGACTGGTACTTACCGTCAGCTTT
AT2G30490.1	1112	1	DatasetCV	ACTCGACACAGTTCTTGGACCGGGTGTGCAAGTCACCGAGC
AT5G15200.1	482	1	DatasetCV	CTCATCAGGCAGAGGCATATCAGGGTTGGAAAGCAATTGGT
AT5G15200.2	482	1	DatasetCV	CTCATCAGGCAGAGGCATATCAGGTATTGCATCTCTTCGAT
AT4G35830.1	1284	1	DatasetCV	TTGAAGGAAATGAAAGCGGACTGGCATTCTTGCTTGGACAA
AT3G24160.1	870	1	DatasetCV	ATGGACAAGGTATGGCTAAGCAAGGGATGGATGTATTACTT
AT1G05850.1	935	1	DatasetCV	GACACTTTGTCCAAGCGTGGCCCGACTTTTGGCAGCACCAT
AT5G63190.1	1241	1	DatasetCV	TCATGAGGTTGTGAAGAGGGCTTTGGTTCTGGCGATGGATT
AT3G53870.1	524	1	DatasetCV	TCTATGAAGTTCAAAGATGGCTACATGGTGTCATCTGGTCA
AT5G66120.1	843	1	DatasetCV	GAACAAGATCCTAGTACGGGCGAAATTGCCTACAACTCCGC
AT2G07711.1	677	1	DatasetCV	AGCTGGTTAGATGCGTGGGGCAGAGGGCTCGTAGTACCCCC
AT2G21170.1	813	1	DatasetCV	TGCATACGAGCCTGTATGGGCAATTGGAACTGGTAAAGTTG
AT3G17390.1	1048	1	DatasetCV	AAGGACCCAACCAAGGTTGACAGGAGTGGGGCTTACATCGT
AT4G23420.1	160	1	DatasetCV	AGAGGGGGTTTGCGTTCGCGCAGCCCCTACCATTCCCAGTA
AT1G50480.1	997	1	DatasetCV	GGTGATTGGTAACAGCAAGGCAGGGGATCCGATAACAGCAG
AT4G20890.1	297	1	DatasetCV	TTTAACGAAGCTAGCGGAGGCAAATACGTTCCTCGTGCTGT
AT1G24180.1	977	1	DatasetCV	CCTATTATCCTTGAGATGGACACTTACAGATACCACGGTCA
AT3G48170.1	1080	1	DatasetCV	TCAGATCCTTTTGAAGAAGGCTGTAGGCTTGGTCCTGTTGT
AT1G80380.1	1099	1	DatasetCV	GTATTTGCCGGCGTATAAGGCCTATCTTCCAACTCTTTACG
AT1G65930.1	501	1	DatasetCV	GTGGAGAAGTCCAAATGGGACCATCAGGAATATCCTGAATG
AT1G72370.1	358	1	DatasetCV	TAGGCCCTATGGACAGAGAGCTGTGTTGAAGTTTGCTCAGT
AT4G34110.1	1579	1	DatasetCV	CTCAGTTTTCCCAAGTGAGGCCAGTTGCAATGCAGCCGTCT
AT4G14960.1	350	1	DatasetCV	TGTGATCGACGAGGTCAGGACTGGTACTTACCGTCAGCTTT
AT2G44120.1	604	1	DatasetCV	ACGAGTTGATCCGATTGAAGCGGGAGGCTAAGTTGAAAGGA
AT3G48990.1	502	1	DatasetCV	CTGCTTGACGCTGGCTCGGACCTTGTACTATCCGTTGCGGA
AT1G59870.1	4000	1	DatasetCV	GTTCTACAGAGAAAGAGCAGCAGGAATGTACTCAGCCATGC
AT3G52360.1	471	1	DatasetCV	TAAATCGAATTCGAAGATGGCGGCAACTATTTGACTTTAAG
AT1G62660.1	544	1	DatasetCV	ACAATACTATTTTGTCGTGGCAACGCACGGCGTTTCATTTC
AT2G37340.1	754	1	DatasetCV	GGCAGCCCAAAGATCATAGACGGGAGCCCACCACCATCACC
AT5G64120.1	687	1	DatasetCV	GTGGTGTATTCAGGAACAGGCTATTCAATACCACCGGACAA
AT4G24690.1	1590	1	DatasetCV	CTGACGGTGCTAAGTTTGGGCAACGTGTTTGGGTGTTGATA
AT2G44350.1	1167	1	DatasetCV	TGGAAAACATTAAACAGTGGCAAGGTTATTCCGGGATATGG
AT1G51060.1	287	1	DatasetCV	GGAATTGGCTGGAAACGCAGCGAGGGATAACAAGAAGACGA
AT2G26650.1	2240	1	DatasetCV	ATCTTGCTGAGCAACAAGGGCATGAGGATATTAAAGCCTTA
AT1G79230.1	1225	1	DatasetCV	TGGGTCGTGGACTGAATGGGCGACACAACCAGACTTGCCCA
AT5G57870.1	1972	1	DatasetCV	GCAAGACAAGCGCACTGTTGCAGGGAAGTGGTTCAGTGTCG
AT1G15690.1	391	1	DatasetCV	GACTGCTATTTCCGAAGGTGCAACTTCATTCCTATTCACGG
AT2G23090.1	321	1	DatasetCV	ATGCAGGGAGCACGCGGAGGCGAAGCATCCGAAAGCCGATG
AT1G79340.1	646	1	DatasetCV	TGGAAGGCGCCATCGAGTCTCGAGGGTTTCACATTGGAGGG
AT5G60660.1	868	1	DatasetCV	TCAGTTTATTTTAAGAGCGGCTGCGATTAAAGCTCTTGGCT
AT1G78080.1	1138	1	DatasetCV	AAGGCGGCGTACAAGCTGCGCGGCGATTTCGCCCGGCTTAA
AT1G18880.1	578	1	DatasetCV	CGAAGACAAAAGAAGGGAAACGAGGGATTGAGAGTTTCTTC
AT5G44790.1	2885	1	DatasetCV	AGATGTAGCAATAGAAGCAGCAGATTACGTTCTGATGAGAA
AT1G07890.1	771	1	DatasetCV	TAGGTCTGGCTTCGAAGGTGCATGGACATCAAACCCTCTAA
AT5G64100.1	423	1	DatasetCV	TAAGGCTCGGCTTGAGAAGGCTTGTCCTCGTACCGTTTCTT
AT3G45010.1	1414	1	DatasetCV	CCACGTAGACAACAAAGAAGCGGGTTTAATGAAGAACTACG
AT4G35830.1	1808	1	DatasetCV	TGTTGTAGCCTATGCTCTGGCTGGAACTGTTGACATTGATT
AT3G09630.1	633	1	DatasetCV	TTATGATGATGCTGAGAAGGCAAAGAACAGCATTGGAATCC
AT5G66760.1	772	1	DatasetCV	CTGCTCATGGCTAGTGATGGCAGTTGCCAGGGTGTAATTGC
AT1G62380.1	1033	1	DatasetCV	TGACTACATGAAGCTTTATGCAGGGGTCAAGTTTCAGCCCA
AT1G66280.1	528	1	DatasetCV	GTGACTGTTTTCCATTGGGACACTCCACAAGATTTAGAAGA
AT5G40370.1	448	1	DatasetCV	GCTGTTAACTGAAGCTGGAGCGATCGCAGGAAAGACTGCAA
AT5G58860.1	1455	1	DatasetCV	GGCTTATAATCAGATGAAGTCGGTGGCTTCAGCCGTTCTCC
AT3G04730.1	570	1	DatasetCV	GAAGGTTAGCATGGACGGTGCACCGTACCTACGGAAAATTG
AT5G13780.1	524	1	DatasetCV	AGCAGAACCATCACCACGCCCACGGTCATCATCATCACCAT
AT1G76490.1	1225	1	DatasetCV	AAGTGTTAAATGCACAATCGCGGGGAAGAATGCTTATGTAA
AT2G38800.1	495	1	DatasetCV	TATTTGATGCTTAACCATGGCGAGACTTTTGACCAAGTTAA
AT5G10450.1	445	1	DatasetCV	TCTGATCCCATCTGCTGGAGCGAGTGAGTCTAAGGTCTTTT
AT2G07733.1	723	1	DatasetCV	TAGATGATAATGAAAAAGGGCGCCGCGTCTGTACGGGCGGG
AT5G08690.1	1001	1	DatasetCV	TATTTCCGTGATGCTGAAGGCCAAGATGTCTTGCTTTTCAT
AT5G08690.1	569	1	DatasetCV	GAACCCATTGACGAGAGAGGCGAAATCAAGACCGAGCATTA
AT1G34370.1	396	1	DatasetCV	TTTCTTACAAGGTGTTAGGGCTCAAGCGTGGGATCCAAGGA
AT2G40890.1	1052	1	DatasetCV	AGCGATAACAGCGGAATGGGCGATGGCGGAAATGATCAAGA
AT3G05590.1	208	1	DatasetCV	ATGGTGTGATATTGAAGAGGCTTTTCATGAGCAAAGTCAAC
AT1G74840.1	243	1	DatasetCV	GTCTGACTATGAACAGACGGCGGAGACTCCAAAGATCGACG
AT3G53430.1	534	1	DatasetCV	AAGACCCTAAGGATCTTCAGCAGGAGATTCAAGAAGGTGAG
AT1G01620.1	729	1	DatasetCV	GCCACTGACGCCAAGAGAAGCGCTCGTGACTCCCACGTTCC
AT1G50480.1	1355	1	DatasetCV	GGTGGGCCTGATGTTGTTGCCGGGAGACCTCTTGATCGTGC
AT3G17240.1	706	1	DatasetCV	GATTGTCTCATCAACCGGGGCACTGTCTCTGACAGAGATCC
AT1G01620.1	731	1	DatasetCV	CACTGACGCCAAGAGAAGCGCTCGTGACTCCCACGTTCCGA
AT5G39320.1	285	1	DatasetCV	GACGATATCGTTAAGCAATGCAGAGGAAAGAATCTTTTCTT
AT1G02780.1	565	1	DatasetCV	TCAGTTTGAGGCTAAGAGGGCGAAGAACAAGGCTAGCCGAG
AT3G53870.1	638	1	DatasetCV	AAGGTTATGCTTGATTGGGACCCTAAGGGCATATCAGGACC
AT3G03960.1	1166	1	DatasetCV	GAGGCGTTTTTGCCGTACAGCGGGGGCTGTCGCCCATTTGA
AT1G22840.1	193	1	DatasetCV	TGTCACACCGTCGAAGCAGGCGCCGGTCACAAACAAGGACC
AT2G01520.1	347	1	DatasetCV	TCGAAGGTCACGTGATGGAGCAGCTTAAAGTGTATGACGTC
AT1G79340.1	1247	1	DatasetCV	CAGAGAAATGGTTACAAGGGCTAGGAAGGCATTGAAGAAGC
AT3G01540.1	1780	1	DatasetCV	GATCAAGATTTTGGAAGGAGCAAACCAGCGAGTTCCTCCTC
AT3G15950.1	2321	1	DatasetCV	GGTGGAGACGACAAAGAGAGCAGAACATATTTGGGTTGAGT
AT1G14010.1	458	1	DatasetCV	CAAGGATTGGTCGAATGTGGCAAAGAAGAGCCAAGTCGAAA
AT1G10670.1	406	1	DatasetCV	ATGTTGTTTGGAAAGCGTGGCAAGAGTGGTTTGGTTGCCTT
AT5G03240.1	1181	1	DatasetCV	ACCTTCGTTTGGGCTTGTAACGGGCCTTTGTATTTCAACTC
AT3G18060.1	467	1	DatasetCV	ATCGTTGCTTCTGGTGATGGCAAAGGCAAATCTCTTGTTCG
AT1G14870.1	509	1	DatasetCV	GGTGCTCCGGTCTTCCAAGGCGGCATGACCCGCTAAGAATT
AT3G54620.1	212	1	DatasetCV	TCGAAGTCAATCGGAGTGGGCGTTCCACAGGCTTATCAATG
AT5G17330.1	752	1	DatasetCV	GAACACCATTTGTGTTGCGGCCATTCTTGGTTCCACTCTTA
AT3G09820.1	482	1	DatasetCV	CCACTATTACGAAGATGAGGCAACACCTACCGGAACTTGCG
AT4G37830.1	376	1	DatasetCV	AGGTGAAGCACAACAAAGAGCACTGAGTCTTGCGTGGTCAT
AT1G71980.1	754	1	DatasetCV	GGTCTTTGTTACGAAAGAAACGGGAGAAGTTTTAAAGGAGT
AT2G17720.1	946	1	DatasetCV	TACTTTTCTGGAACATGAGGCCTGATGCATCTCTAGACCCT
AT4G30190.1	2046	1	DatasetCV	TGCTGTTCTCACCAGCAGAGCTATTTTCCAGAGAATGAAGA
AT5G10360.1	511	1	DatasetCV	AATGAGAGGTCCCAAGAGGGCATCAAAGATCCGCAAGTTGT
AT4G34620.1	368	1	DatasetCV	TGGTCGGTTCGAAAAATGGGCAGAAGTCTACGAGCCAACAT
AT5G58060.1	680	1	DatasetCV	GAGCTCAGATTTGAGCATGGCATCACAGATGTTTTACAAGC
AT1G76790.1	1143	1	DatasetCV	CATTGAGTTAACGAAACAGGCTTAGAGTTGTAAGATTATGT
AT5G50920.1	1300	1	DatasetCV	AGTGCATACTTTGATTGGGGCTGGAGCAGCAGAAGGTGCAA
AT1G14980.1	247	1	DatasetCV	CCTGGATCAAGGGATAAGGACGGGAAATTGATTCCGGTCTC
AT4G30600.1	535	1	DatasetCV	CCAGTGTTAAGAAGCAAGGGCAGGTTTCAAAACCTGGACTT
AT4G32410.1	2532	1	DatasetCV	CGCTACTCTTCTGAAGGAGGCTATTCATGTTATAAGCTGTG
AT1G53750.1	1263	1	DatasetCV	TCGCCTCTGCCCAAACTCAACGGGAGCTGATATTCGAAGTG
AT5G37600.1	968	1	DatasetCV	AAGTCAATGAGGGAAGAAGGCGGTTACGAGATCATCAAGAA
AT4G23670.1	544	1	DatasetCV	GACTTTCCCGAACCAAGCGGCTACATGAAATTCGTCAAGCA
AT4G11260.1	1127	1	DatasetCV	ATTTGCAGAGTCGAATGGGACGGTACTGTCGACAAACTGGA
AT3G13310.1	551	1	DatasetCV	GAGACGGGTACACGCCGGAGCGATGGGTCGGTCGGGGCGGG
AT5G05170.1	1265	1	DatasetCV	CTGTTGACCCCTTGAAGGAGCCACCCCTTGTGACAGCCAAC
AT1G78080.1	1192	1	DatasetCV	CGTCATAACGGATCTCACATCGGAGGCGATTTCGGTGAATA
AT3G53420.1	378	1	DatasetCV	GAAGTGGTCTTTCTACAGAGCAGTTATCGCAGAGTTCGTAG
AT2G07711.1	521	1	DatasetCV	GCATATGGGTAGCAAGAGGGCGCTTATGCCCCGACGGTGGG
AT5G58860.1	1236	1	DatasetCV	TGACGTTTTGCCGGACGGGACTTTCGTGCCAAGAGGCTCGA
AT5G61170.1	360	1	DatasetCV	CCTCCTCATTTCTGCAAGAGCAGTGGTGGTGTTGCTCGTCA
AT1G59870.1	3334	1	DatasetCV	AGCGGCTATTGTGATGAGGGCGGTAAGGAACACAGTGGACA
AT2G19760.1	190	1	DatasetCV	GCAATTCTCGGCCAAGACGGCAGTGTCTGGGCTCAGAGCGC
AT5G43350.1	962	1	DatasetCV	AATTCCTTAGACGCCATGGGCTTCATCTCCTTGGAACTACC
AT5G11670.1	1379	1	DatasetCV	GCACTTCAAGCAGCCATGGGCACATGAGCACAAACCTGTGA
AT3G46040.1	190	1	DatasetCV	CAGAGAAGAGAGGAAAGAGGCAGGTTATGATCAGGCCTTCT
AT1G67430.1	535	1	DatasetCV	AGAGCCTGTCAAAAAAGAGCCGGAGACTCAGTTGGCTGCCA
AT2G36320.1	891	1	DatasetCV	TAATCCGTTGGTTATTGCGGCGAAGCTTCAGAAAATATGAA
AT5G64400.1	288	1	DatasetCV	AAGTGCAGTTGCACACAGGGCTGTTGATTCTGTGATGGGTC
AT3G19450.1	755	1	DatasetCV	GGCTGCACCGCTACTCTGCGCGGGAGTAACGGTTTATAGTC
AT3G25520.1	158	1	DatasetCV	TGGAAAGACTGACTACAGGGCAAGGATCCGTCTTATCAACC
AT5G05170.1	915	1	DatasetCV	AGATATCCTAGCAGATGAGGCTCTGCTGAATGACGAAGCGA
AT5G09900.1	490	1	DatasetCV	ATATGTTGAAATCGAGAGGGCACGTCTCACCAAGAAACTTG
AT1G07140.1	825	1	DatasetCV	TTTAAGTTGCCAAATCCTGGCGAGGTAATTAAGCCTCGAAA
AT2G36380.1	465	1	DatasetCV	GGAGATGTTCGTAGTGCAAGCAGAGCTCTTCCTACTCTCTT
AT2G45820.1	414	1	DatasetCV	GTCAAAGGCTGAGAACAGGGCACAAAAGAAGATCTCTGATG
AT1G07140.1	231	1	DatasetCV	GAGGTTGCCGTCACTACCGGCGAGGAAGACGAAGATGCCGT
AT3G19450.1	1371	1	DatasetCV	ACAAACTAAAGAGGGCAGGGCACATTGATACATGAACGAAA
AT5G44020.1	774	1	DatasetCV	GTGATGGGTGCACAATGGAACAGCTTCTCTGGTTGTCCAGT
AT1G72710.1	389	1	DatasetCV	CCAGACGAATGAAGAAGTGGCTATTAAACTTGAAAATGTGA
AT4G30530.1	806	1	DatasetCV	TGCAAGAACTTCCTCAAAGGCAGAGTTCCAACTAACTAGTT
AT1G57720.1	1364	1	DatasetCV	GACGCTGAGCCATTTGAAGGCGAGGCTCTTTTGGACGCCAA
AT4G27090.1	432	1	DatasetCV	AGAAAGCTGGTGTTGTCAGGCAAGAGCTTGCAAAACTCAAG
AT2G44160.1	1746	1	DatasetCV	GACTTGGTCAAGAAGCTGGGCTAACTTGTACCCAGAAGCCG
AT2G30930.1	364	1	DatasetCV	TTCTAGAGGTATAGAAGGAGCCAAATCTTTGCTTCAAACTT
AT1G66270.1	959	1	DatasetCV	TGTTGGGATGGCATCTGGAGCCAACTACTTCGGGAGATTAT
AT2G35743.1	75	1	DatasetCV	TATTCCATTGCCTTGCGGAGCGGCGTTGCTGCTTTTACCGT
AT5G03290.1	457	1	DatasetCV	ACCTGACTCTTAGGAAAGAGCTTAATCTATATGCCAATGTT
AT5G43780.1	999	1	DatasetCV	GGAGGATGGTGTACTGGATCCAGAGACCACTGTAGTCTCTA
AT1G80460.1	831	1	DatasetCV	CTCAAAACCTTGAGCTGGGACCAGGACACTTTGAAGACACT
AT5G62300.1	404	1	DatasetCV	TTCAGCTCTCCTGATGTGGTCAAGCAGATCACCTCCATCAC
AT3G19820.1	1062	1	DatasetCV	TACCACAGGCACACAAGGTGCTTGTACTGGGAAGGGAAGCT
AT1G02500.1	972	1	DatasetCV	CCAACCAAGGTCGACAGAAGCGGAGCCTACATTGTGAGACA
AT4G24690.1	2269	1	DatasetCV	CCTCACAGGGGAGAAGGAGGCTTGATGAGCTCTTTGGTTTC
AT3G57870.1	187	1	DatasetCV	TGGCAAAGCCGGAGACGGGGCAGGATGGAACTGTGAATCTA
AT2G39390.1	331	1	DatasetCV	AAAGTCTGCTTTGAGAGAGGCATACAAGAACAAGAAGCTTT
AT5G48230.1	1201	1	DatasetCV	GCTGCCCTTGTCCTAGTGAGCGGAGAGAAGGCTCTTCAGCT
AT1G76180.1	660	1	DatasetCV	GGCACCGGTGGTTGTTCCTCCTCCTGTGGAAGAAGCGCATC
AT1G49300.1	543	1	DatasetCV	GGTGGTATCAGAGAAGAAGGCTCGAGCTTGGTGTGCTTCGA
AT3G62120.1	322	1	DatasetCV	GTTAAGAAAGATGAGAACTTCGGGGAATGGTATTCTGAGGT
AT1G79550.1	813	1	DatasetCV	ACAGTTGACATCCTCCTGCTCGGTGGAGGTATGATTTTTAC
AT2G33220.1	303	1	DatasetCV	TCCGGTGCTTTTGCTTGGGGCATGTACCAAGTTGGTCAGGG
AT1G59870.1	3679	1	DatasetCV	AGAACTAAGTGTACCACCAGCAGGAGCATCAGATCTTTACT
AT3G04120.1	800	1	DatasetCV	CCAAGGCTGTCGGAAAGGTGCTTCCAGCTCTTAACGGAAAG
AT5G03240.1	708	1	DatasetCV	GTAAGCAGCTCGAAGATGGACGCACCCTTGCAGATTACAAC
AT2G05710.1	1394	1	DatasetCV	TATGTCTCCCGAGTATGGTGCAACCATGGGCTTCTTCCCTG
AT5G43780.1	1197	1	DatasetCV	GAAGAAAGTGCTTAGCATGGCACCAGGACTTGAACGCCTCA
AT3G10860.1	272	1	DatasetCV	ATGCTCAGTATTTCAAGGAACAGGAGAAGCTTGAGCACAGA
AT3G51920.1	354	1	DatasetCV	GACATCTTTGGCAACGGTGGCATCACTTTTGATGATTTCTT
AT2G01140.1	497	1	DatasetCV	ATCTCTGGTTCCATTCTCTTCGAGGAGACTCTTTACCAGTC
AT5G54800.1	1041	1	DatasetCV	AGATGTGGGTCGATGGCTGGCAGACAGCGCTCGCTACTGTC
AT3G49010.1	469	1	DatasetCV	TCGTGCCCGCAAGGTCAAGGCTGGTGACTCTACACCAGAAG
AT3G49010.4	453	1	DatasetCV	CCCGCGTCGTGCCCGCAAGGCTGGTGACTCTACACCAGAAG
AT3G49010.5	298	1	DatasetCV	CACTCTTGAAGAGCTCAAGGCTGGTGACTCTACACCAGAAG
AT5G15650.1	923	1	DatasetCV	AATACAAGGGAATCTTCTGGCAGGAGGAGATCATTCCGTTC
AT1G11580.1	475	1	DatasetCV	AGTTCGATGGAGGAACTTCGCGGAGGAAACTATAATCTTGA
AT1G20696.1	430	1	DatasetCV	CTTGTCTGACTCTGAGAAGGCTCCTTATGTGGCTAAGGCTG
AT2G07717.1	1549	1	DatasetCV	CAGTATGTCTCCAGATAGGGCGCCCCACTAGTCCGGCTAGC
AT5G58290.1	786	1	DatasetCV	TTTGTGCAAAAGTATCTCGGCGAGGGACCTCGTATGGTTCG
AT4G24520.1	260	1	DatasetCV	AAAACGACGGCGGATCGGAGCGGGGAGCTGAAGCCTTTGAT
AT4G23630.1	1500	1	DatasetCV	TCGAAGTAATGTGTTTTGGGCGTTTTTTTAGGTGGCTCTTT
AT5G25460.1	1108	1	DatasetCV	ACTTTCTATGCCATGAGGAGCGATGATTTCTCGTCATTGTG
AT1G80460.1	762	1	DatasetCV	ACTGGCGGTATCAATGGCGGCCTTCATGTCACTGATGTCAC
AT1G32450.1	426	1	DatasetCV	TAACAACGTTAGCAAATGGACAGGGACTGTTTATATCTTCT
AT2G37130.1	544	1	DatasetCV	AGGAGAGATAGTAGAGGGAGCTACTTGGGAGATGTTGAGAC
AT2G23090.1	311	1	DatasetCV	CGGAAGTGAAATGCAGGGAGCACGCGGAGGCGAAGCATCCG
AT3G56310.1	997	1	DatasetCV	CATTTGGGCTTTGATGAAGGCACCTCTCTTGATTGGTTGTG
AT2G07717.1	1537	1	DatasetCV	AGGTATGGTTTTCAGTATGTCTCCAGATAGGGCGCCCCACT
AT5G44610.1	559	1	DatasetCV	GGTTGAAACTCCGGCCAAGGCTCCGGAAACTCCGGCGGCTG
AT2G47000.1	1755	1	DatasetCV	TGGACAAAAACAGAGAATCGCGGTGGCTAGAGCAATCTTAA
AT5G47990.1	977	1	DatasetCV	CACTATACAGTGGACCATGGCGGAGATCATTAAGAATCCTA
AT4G26970.1	1921	1	DatasetCV	AATATTTGGATCGAAGTGGGCTCCGAGAGTCCTTGACCAAG
AT5G58860.1	1098	1	DatasetCV	CAATGATCAGGAGAAATGGACGGAGGAGCCGTTAGAGTTCG
AT4G35830.1	2247	1	DatasetCV	AGAAGAGACTTCAACTCATACGGGAGTCGCCGTGGTAATGA
AT2G07731.1	248	1	DatasetCV	GGTCTCTGGTTTGATGGTTGCACGTGCTAAAAATCCGGTAC
AT1G54000.1	1043	1	DatasetCV	ACGTCACAACTCCGAGAAGGCGCAAGAAATGTTTGCCCATC
AT2G36120.1	858	1	DatasetCV	GTGTCATATCTCGTAAGGGACTATATAGTTTCACGATTTAT
AT3G53260.1	1049	1	DatasetCV	ATCTTCGCGGAGGTTATGAGCGGGAAACCTGAGTTTACCGA
AT1G09430.1	1159	1	DatasetCV	GCTCTTCTAATTGGAGGAGGCATTGCCAATTTCACTGATGT
AT2G17390.1	725	1	DatasetCV	AATGGGTATAGCTGTTGGAGCAGACCAGACTGTTGCAGCTG
AT2G21520.1	787	1	DatasetCV	GATGTTGAGGTTCTTGAAAGCGAGGAAATTTGATGTTGAGA
AT5G35680.1	440	1	DatasetCV	CAAGTATATGTCTGATGAGGCTAGGCTTCTTAAGGCGTATG
AT1G18270.1	1601	1	DatasetCV	AATGGTCAATCAATTGCTTGCGGGAGTTCATATCGCATCAG
AT5G54680.1	541	1	DatasetCV	TCCTCCCAAAACAGACAAGGCTGCTATCTTGGTTGATGCTG
AT5G54500.1	306	1	DatasetCV	AGAGACGCTTCACGAAGAGGCACTCTCTAAGATGAGCGCAC
AT1G17880.1	232	1	DatasetCV	ATACAACTGATGACAAGAGGCTTCAAAGCACTCTTAAGAGA
AT2G13360.1	1134	1	DatasetCV	TTCGGAGATTGTGAGAAGGGCATGGCAGAGGTACAACTTAA
AT1G11650.1	765	1	DatasetCV	TGAACAGATCCGTGCTATGACGGAGATGAATGGCGTTCCTT
AT5G19120.1	835	1	DatasetCV	GTGAAATCGATTAGAGTCAACGGGGAAAAGCTCTCCGTGGA
AT2G21870.1	806	1	DatasetCV	CAGGATGAGGAAATGCCGGACGTGAAGTCTCTAGACATCCG
AT1G07890.1	826	1	DatasetCV	TACTTCAAGGAACTCTTGAGCGGAGAGAAGGAAGGCCTTCT
AT3G16400.1	844	1	DatasetCV	CATGGCATAGCACAAGTAGGCAACAAGATTTACTCCTTTGG
AT5G42500.1	385	1	DatasetCV	CTTTAACTTGGCTTTTACGGCGGGAGAGTTTAATGGAAGCA
AT4G14270.1	338	1	DatasetCV	AGTTACAGAAGCAGATGTGGCTAGTTATTTGAAGATGCTTT
AT4G14270.2	332	1	DatasetCV	TGATACAGTTACAGATGTGGCTAGTTATTTGAAGATGCTTT
AT4G14960.1	1452	1	DatasetCV	CGTGTTGTGATGAATGGGGGCTCGAAACTCTTACGAGTCTT
AT3G01390.1	304	1	DatasetCV	CTGGTGCGAATGTGAAGAGGCTGGAGCAAGAGACTGATACC
AT5G01210.1	1117	1	DatasetCV	CATACCGACGTTGGCGTCTGCGGGAGATCTGCTAAGCAAAG
AT1G31910.1	806	1	DatasetCV	AGTCAAGCCTGAAAGTTGGGCATGGAAATGGACAGATGTCA
AT2G31570.1	287	1	DatasetCV	TGTACGAGAAATACAAGGAGCAAGGGTTGGAGATATTAGCA
AT4G01850.1	817	1	DatasetCV	CCATCAGGCCGGTTTGTGATCGGGGGACCACACGGTGATGC
AT4G25820.1	682	1	DatasetCV	CGCGTGAAGATCGACTGGAGCAACGCACCATTCAAGGCCTC
AT3G08530.1	4735	1	DatasetCV	TGTTGAAATGAGACGTGTGGCTGCTTATATCTACAAGAAAG
AT3G15730.1	965	1	DatasetCV	ATGTGCTGAAGAAAGATGGGCTCATGGCTACTCATGATGAA
AT1G31770.1	462	1	DatasetCV	TTAGGTCCATCAGGCAGTGGCAAAACCACTCTTCTATCAGC
AT1G19910.1	580	1	DatasetCV	CGAGCTGGTCAGTCTAGAGCCGAGTGAAATCCAGAGTATCT
AT5G20250.1	700	1	DatasetCV	CAGAGAATGGGAGAAATGGGCCGAGATATTCCCTACGAGAC
AT2G39310.1	1109	1	DatasetCV	AAATTTGAGTACAGTAAGGGCAAAGACCTTGTACCCGGAGA
AT1G23190.1	1288	1	DatasetCV	TGAGAAAGACGGAATATGGGCAGTTCTTGCATGGATGTCTA
AT1G59870.1	3030	1	DatasetCV	GAATCTCAGGATATTGTGAGCAGACCGATATTCACTCCCCG
AT4G01100.1	1117	1	DatasetCV	GCTTCCGCTATTGTAACAGGCGAAGGGAGAAGCACAGCTTC
AT3G09500.1	310	1	DatasetCV	GAAGTCTGCTCTAAGAGAAGCATACAAGAACAAGAAGTTGC
AT2G42680.1	236	1	DatasetCV	TGCTGGAACCAACAAGGCGGCATCAAGCGGCACATCTCTGA
AT1G50480.1	992	1	DatasetCV	AAAATGGTGATTGGTAACAGCAAGGCAGGGGATCCGATAAC
AT3G10410.1	323	1	DatasetCV	AATATACTTGCCGATGGTGGCCCTACTGTCGACGATTTAGG
AT5G07090.1	676	1	DatasetCV	ACATTCAAGACTCAACAGGGCATGAGTTTGCCACAAGGTTG
AT3G18130.1	760	1	DatasetCV	GAAGCTTTACTCGCTTGAGGCGGGTTCGATTATTCACTCGC
AT3G01190.1	840	1	DatasetCV	TAGTGGCTAAGAGAAGAGGACTTTTCCAGTCGGATGCTGCT
AT1G09640.1	922	1	DatasetCV	GCTTGCTGAAGAGGAAGAGGCACCAAAGCCCAAAGCCAAGA
AT4G14960.1	1110	1	DatasetCV	GATGTGAACGCAGCGGTTGGCACCATCAAGACCAAGCGAAC
AT1G20840.1	1320	1	DatasetCV	CCACATCCTACAAGTGGAAGCACTTTAAGCATGAGACGACA
AT5G32440.1	740	1	DatasetCV	TAGTGACACAGCAGAAGCGGCAAAGAGAATCGGAAGACCAA
AT5G20020.1	490	1	DatasetCV	AAGTCGATGTGAAGAACAGGCAAGTGAAGGCAAAGCAAGTC
AT3G30390.1	951	1	DatasetCV	ATTATGAAGTTGATCAGTGGCGGTGTGGCGATGCCAAGATT
AT4G26970.1	2924	1	DatasetCV	CATTCCTCTGTGTTTCAAGGCTGGGGAGGACGCGGAAACCC
AT5G37600.1	1185	1	DatasetCV	GATACTTTGAGGACAGGAGGCCAGCTTCGAACATGGATCCT
AT5G60390.1	1412	1	DatasetCV	GGCTGCAGTGAAGAAGGGTGCCAAATGATGAGACTTTCGTT
AT2G45070.1	244	1	DatasetCV	CGCACCTGGTCTCAAGATCTCCCCCAATGTTGTTCTTATCA
AT5G11670.1	1404	1	DatasetCV	GAGCACAAACCTGTGAAGGACCTCATTGGTGCTGTTAATGC
AT2G43160.1	1046	1	DatasetCV	GTAGGAGTTCGGAAAGAGAGCGGGAGGATGATGGCCATTCT
AT1G48300.1	11	1	DatasetCV	NNNNNNNNNNCGAGATGCGGCGAGGAGAAAGAGAAGGTTAA
AT1G09780.1	462	1	DatasetCV	CTTGTTGGACTTCTCAGTGACGGTGGAGTTCACTCTCGTCT
AT4G24620.1	1234	1	DatasetCV	TGCTGCTTTAATGGATGAGGCTACTAGGACAACTTCGATCA
AT5G07960.1	193	1	DatasetCV	CATTCCACGGCCTGTAGCGCCGGAGGATCTTCCCGTTGACT
AT3G24503.1	1071	1	DatasetCV	ATTCCACTGCTCGACAAGGACCTCAAGTGGATAAAAGACAG
AT1G02920.1	482	1	DatasetCV	CGTTGTTGAAGAAGAAGAGGCTAAGCTAGCCAAGGTCCTCG
AT2G30110.1	3148	1	DatasetCV	AGTGGCTGGAGGACAAAGGGCTTAGCGCATACAGCATCTCT
AT2G37250.1	631	1	DatasetCV	AGAACATGTAGTCAATGTGGCAAGGGTTTTAATGTAGCTCA
AT5G67300.1	440	1	DatasetCV	CCATCGGGGTTACGATGGTTCGGAGGATCATCGGCCGGTTA
AT2G21660.1	476	1	DatasetCV	GGTGGAGGAGGATACAGCGGCGGCGGCGGCGGTTACTCCTC
AT3G62420.1	678	1	DatasetCV	TCTCTAACAGAGAATCTGCTCGGAGGTCAAGGATGAGGAAA
AT5G08670.1	1152	1	DatasetCV	CTTCAAGAGCGAATTACTACCACCAAGAAAGGGTCTATCAC
AT2G43590.1	789	1	DatasetCV	TGTGGACAGCTTGGTGTGGACCCTGGTCCTAACCTTAGTTG
AT5G59290.1	678	1	DatasetCV	GTTGCTATGACGAAGGCAAGCGGGTAGCCGAAACCTTGATG
AT1G49240.1	1292	1	DatasetCV	GCAGATGTGGATCTCTAAGGCAGAGTATGATGAAGCAGGTC
AT1G56340.1	453	1	DatasetCV	TTTGGGCCAGATATTTGTGGCTACAGCACTAAGAAAGTACA
AT3G52880.1	267	1	DatasetCV	GTATTTGTTTCCTGAAGGGGCTGCTAGACTTCCAGGTTTCC
AT3G15810.1	508	1	DatasetCV	AGTAGAAGTTTACGACGGAACAGGAGAAGAGTACATTATCG
AT4G24690.1	454	1	DatasetCV	CGTGTCCACTAACTCTGCTGCTCCAGAGAGTAGTGGGAGTT
AT3G45980.1	368	1	DatasetCV	CGACATCTTCGAGAAATTGGCATCGGAATCTTCAAAGCTCG
AT5G15650.1	792	1	DatasetCV	TCGTTACGACGATATGTGGGCTGGTTGGTGCATCAAGGTGA
AT1G07920.1	312	1	DatasetCV	TGGACAAACTTAAGGCTGAGCGTGAGCGTGGTATCACCATT
AT2G36830.1	759	1	DatasetCV	TCGGCGGTGGAATCGCTGGACTCATCTACGAAGTTTTCTTC
AT3G55770.1	402	1	DatasetCV	GCACTCACTGCAAAAGCAGGCTTCAGCTGAGTAGTTACTCA
AT5G28540.1	1003	1	DatasetCV	CCGAAGGGAATGTGAGAGGGCAAAGAGAGCTCTAAGTAGTC
AT5G28540.1	679	1	DatasetCV	AAGGCAAGCTACTAAGGATGCTGGTGTTATTGCTGGGCTCA
AT3G60245.1	322	1	DatasetCV	CGATCAGAAGGTTGAGGGAGCAGATCGAGGGTTAAAAGTCT
AT5G13850.1	339	1	DatasetCV	CGTGTCACCGTCAAAAAGAGCAAGAATATCTTGTTTGTGAT
AT5G47990.1	939	1	DatasetCV	GTGGATCTGTTCAGTGCAGGCACTGAAGCCTCGGCGAACAC
AT5G23740.1	314	1	DatasetCV	GAACCGTTTCTATCAGAGGACGTATCTTAGCTGGTACTTGC
AT4G34200.1	996	1	DatasetCV	TGCTGGTATTGTTGCGCAGGCTGCACTTGATGTTTTCACCA
AT5G56000.1	544	1	DatasetCV	TATGTGTGGGAGTCTCAGGCCGGTGGATCTTTCACGGTGAC
AT5G44790.1	1302	1	DatasetCV	GATGTGCTCGTCGCTCTGGGCACGTCTGCTTCTTACTTCTA
AT1G63000.1	693	1	DatasetCV	CGGTATGAGAAAGTTGTGGACATCCCAAACTCGATGACAAT
AT1G26550.1	404	1	DatasetCV	GTTCCCTCGAGGAAAGATGGCAGGTCCATTCCAAGATGTCG
AT5G07090.1	753	1	DatasetCV	TGGGTGTCTCTTCCAAAGGGCAAAGGTATTAAGCTGACCAT
AT4G17340.1	302	1	DatasetCV	ATAGCCGCCAACATCTCCGGCGGACACCTTAACCCCGCCGT
AT1G75750.1	418	1	DatasetCV	AATTGCTGCGGATAATGGGACGATGTCGTTTTGTTAGTATT
AT3G02080.1	195	1	DatasetCV	TCTCATCTCAAGCGATCTGGCAAGATCGAGCTTCCCACATG
AT3G16450.1	334	1	DatasetCV	TGCAGACGACTACATAGTAGCAGTGCAAGTGACCTACGACA
AT3G61440.1	822	1	DatasetCV	ATGGGAATTGGCAGTGGAGGCACAGTCTCTGGTGTTGGCCG
AT1G73330.1	150	1	DatasetCV	GCTCGTCCTGACAACCATGTCGAGGACTCTGTAGGCCGTCT
AT2G33150.1	505	1	DatasetCV	TCTCAGAGAGCCAGTGAATGCAGGATGGCTGCGTTCTATGC
AT5G59090.1	891	1	DatasetCV	TGACCCGATAGCGATCGGAGCTTTTCACGCTATGGCCAAAG
AT1G70770.1	1360	1	DatasetCV	TGGTGCACCAGGAAGCAAGGCGATGAAACAAGTCACACAAC
AT5G56010.1	2014	1	DatasetCV	TGAAGGACCTTGTACTTCTTCTCTTTGAGACCGCTCTTCTC
AT5G16110.1	608	1	DatasetCV	AGGATAATGGAACAATAGGGCAGTTACTATCATCATCCCCA
AT2G07723.1	812	1	DatasetCV	GGCTTATGTGCGACCTGTGGCCCACGCCTCCTATTTGTTCA
AT3G16240.1	678	1	DatasetCV	CATTGGTCTTATCGTTGGTGCCAACATCCTCGCCGCCGGTC
AT5G19760.1	588	1	DatasetCV	ACTTTGCCGCTAGCTCAGCGCAGGAATTATACCAATGCTTT
AT1G35720.1	474	1	DatasetCV	CGCAGCTGCTTCACGCTAGGCAAGCTTACCATGCTCGCTAC
AT5G59290.1	722	1	DatasetCV	GACTACCACAGACAACATGGCATTGAAATCCGCATTGCTAG
AT4G09320.1	504	1	DatasetCV	GGACCTGTCAACTGGCAGAGCAGCGTTCACCCTTGGGTCTA
AT3G60750.1	1214	1	DatasetCV	CCGTGCTGCCATTAAGGAAGCTAAAACTGTTACTGACAAGC
AT5G08690.1	830	1	DatasetCV	GGGGAACGAACCCGTGAGGGCAATGACTTGTACAGAGAAAT
AT2G33150.1	1197	1	DatasetCV	CATTCCTGCTGCAGTTAAGGCGGCTGGTTTAGAACTTGATG
AT4G24190.1	928	1	DatasetCV	GCTAGCAAAGAGGTTGAAACCGAGGTCCCAGTTGAGGAAGA
AT5G48230.1	1212	1	DatasetCV	CCTAGTGAGCGGAGAGAAGGCTCTTCAGCTAGGACTTCTAG
AT2G36380.1	1455	1	DatasetCV	GTGCATGACTTCTCAAGCGGCTTCAATTCTTTTCACGCAGG
AT1G13360.1	309	1	DatasetCV	CGGTCACCACCACGACGGCGCAAGGTTCCTCTACCGCCGGC
AT1G09640.1	1464	1	DatasetCV	TCCATTTACAGGTTTTGCAGCTGGGGCTTTACATATCTTTC
AT1G79530.1	740	1	DatasetCV	GCTGCATCCCATTTGAAGGGCGGTGCCAAGAAAGTTATAAT
AT3G08530.1	4948	1	DatasetCV	CTTAATCCGACCAGACGTGGCTCTAGAACTTGCCTGGATCA
AT1G22440.1	411	1	DatasetCV	GTAGACGGATTTAAACAAGGCGACGTCGTTTTGCCAGTGTT
AT5G47050.1	1047	1	DatasetCV	GATGTAGGATTTGCCGGCGGCGATCGGCGACGGTGTTGGCT
AT5G08680.1	1651	1	DatasetCV	GGTTTGTTGGATGGCAAGTACGATGATCTTTCCGAACAATC
AT2G36530.1	466	1	DatasetCV	TGCTGTCTGCAAAGCTGGGGCTGTTGTCAGCGGCATTCCTC
AT2G39460.1	245	1	DatasetCV	GAAGGACAAAAAGATTAGGACCAAGGTCACCTTCCACAGGC
AT5G59420.1	461	1	DatasetCV	GACTATGCTCCAGAAGATGGCTGAGATAATGGAGTATTCTC
AT2G39310.1	558	1	DatasetCV	CCCAAGGTGGTACAGACGGGCGTGTTTGGGATGATGGTTCT
AT1G78150.1	895	1	DatasetCV	TGCAGATGGGAAAGTAGAAGCAAGAGACTATTTAGGCGGTG
AT1G47260.1	424	1	DatasetCV	GAATAACATCAGTGTTGGATCTGGGACGAATATCCAAGATA
AT2G20630.1	1035	1	DatasetCV	CAAGGAGTTGATAGAAGAAGCAGTCTCTAAGCAAAGCACAG
AT3G63200.1	520	1	DatasetCV	GTCGCCGACGACGGCTCCGGCAGGCCGATGTTCACTGCCAG
AT2G07709.1	2160	1	DatasetCV	TTATTGCACGGTTCAGAGAGCACTTGTGTATGTGATGCAAG
AT1G29280.1	860	1	DatasetCV	GGAGAAAAAGACGGCTGTCTCGGGGGCTGATGACGTGGCGG
AT3G04840.1	187	1	DatasetCV	AGATTGGTATGATGTTAAGGCTCCTTCAATCTTCACTCACA
AT2G07709.1	1418	1	DatasetCV	AATGATCGGCCGGACAGAGGCTAGGGCTGCTTCCTTCCCAC
AT1G48750.1	224	1	DatasetCV	GTTGCACAAAGCTGAGAGAGCAGCAGCCATGCCTTTGTGGG
AT4G34200.1	1514	1	DatasetCV	TGGAGACAATAACTGTTCAGCTAAGCAATGTGGAGTCCAAA
AT4G30210.1	819	1	DatasetCV	CATTCTTGTCGAACAAGGTGCACAGCGTCTTGTACAAGTTG
AT2G05440.1	259	1	DatasetCV	GGACACAACGGAGGAGGGGGCCACGGACTTGACGGATACGG
AT4G39350.1	1747	1	DatasetCV	TTGGACTATGCAAGATGGAACTCCTTGGCCTGGAAACAACG
AT2G05990.1	534	1	DatasetCV	AGCTGAAATATTGGTTGGGACTTGGGTTCCTGCACTTAATA
AT4G11320.1	1227	1	DatasetCV	ACTAAATGTATGCCATGGAACGGATCGGTTAAGCCATTATC
AT4G23850.1	697	1	DatasetCV	CTTGGGATGAATTTTTGAAGCTGGGTGAAGGAAAGCAATAT
AT4G19880.1	710	1	DatasetCV	TGTTGTTAACAACGAGAGTGCAGAAATAATCCGGATGTTCA
AT4G23100.1	1769	1	DatasetCV	GCTGTACTAAGAAAATGGGACGTGAACAAAAGGTGTCTATA
AT1G02840.1	768	1	DatasetCV	GGACGAAGCGTGAGCCGAAGCAGGAGCAGAAGCAGGAGCAG
AT5G14040.1	1118	1	DatasetCV	TAGAATTGTGATGATCGGGACGTTGACTGGAGCACAGTGGG
AT4G38920.1	492	1	DatasetCV	CTGGTGTCAGGGCCAATGCTCAACAGCCAAAGCTTTTCGTT
AT5G65360.1	362	1	DatasetCV	CGCAGCACTTCAGGAAGCGGCTGAAGCATACCTCGTTGGAT
AT3G28345.1	3446	1	DatasetCV	GAGGATCGCGATAGCTAGAGCGGTTTTGAAAAACCCGTCAG
AT2G36880.1	981	1	DatasetCV	GGTGCCTTCTCAGGAAAGGACCCAACCAAGGTTGACAGAAG
AT2G44060.1	932	1	DatasetCV	TATGATTCGTGGTAAAGGAACAGGGTACACAATCAAAGGTA
AT3G09840.1	1631	1	DatasetCV	AGAATGTCAAGAGAGAGCTCCAGGAGACTGTTCAATACCCA
AT1G50480.1	1099	1	DatasetCV	CATGCAGACACTGGAAGGGACCCCTGTTCTAGTGCATGCTG
AT2G40890.1	920	1	DatasetCV	CCGTCAAAAGTCTAGTGGAGCGAAACAGCATTTCGTTGATG
AT3G58680.1	208	1	DatasetCV	AACGCCGCTCGTCGAAGCGGCGCCGATATTGAGACCGTTCG
AT3G48930.1	250	1	DatasetCV	TCGTGAAGCCATTGATGGAGCTTACGTTGACAAGAAATGCC
AT4G34710.1	2196	1	DatasetCV	TTGCCGTTGCACGAGCTGGACAAGAATGGCAGTGGAGGAAG
AT5G60390.1	274	1	DatasetCV	AACTTAAGGCCGAGCGTGAGCGTGGTATTACCATCGATATT
AT5G21274.1	455	1	DatasetCV	TGATGAGATGATCCGAGAAGCGGATGTTGATGGCGATGGTC
AT2G29750.1	1530	1	DatasetCV	AGTGAAGGAGATTGCTGAGGCGGGAAAAGAAGCTGTGGACG
AT1G54080.1	971	1	DatasetCV	GGTGCTACTTTTGGCGAGGACAAACATAGCTCTGATGGAAA
AT1G59870.1	2560	1	DatasetCV	CAACCCTCTTGGGAAGAAGGCAGGTTTACTTCCAGAAGAAG
AT2G29550.1	266	1	DatasetCV	TAATGTATACTACAACGAGGCGAGTTGTGGAAGGTACGTTC
AT5G01750.2	792	1	DatasetCV	TTGCCCAAATGCACAGGAAGCACACGGTGCAGAGCGTATTC
AT1G74840.1	521	1	DatasetCV	CTCAGAAATACTTCCTCAGGCGAAGTAATCTTAACCGTCGC
AT2G07723.1	1384	1	DatasetCV	GTGCAGCGTAACTAAGAGAGCCATTCCATTTAGGGCGAGAC
AT1G65220.1	1247	1	DatasetCV	GCACTGGTATCGCAAAGGGACCAACCCTAAGGGCAGGCAAA
AT5G19780.1	1157	1	DatasetCV	CACCATCAAGACAAAGAGGACTGTTCAGTTTGTTGACTGGT
AT3G46440.1	1029	1	DatasetCV	AGTGAAAGAGCTGATTAACCCGAGCATAGAGATAAAGATGG
AT2G27020.1	359	1	DatasetCV	CTGGCATGGCTGTTGCTGGGCTTGCAGCTGATGGGAGGCAA
AT3G09630.1	1281	1	DatasetCV	CTTCACCAAATGGCTCGGTGCTAGCCAGTAATAATCTCGTC
AT2G07709.1	1445	1	DatasetCV	TGCTTCCTTCCCACCGCGTCCTTCCTTGTGTATCGGAGATA
AT5G01210.1	988	1	DatasetCV	ATGGCGATCCGTTACACGAGCGAGGAATCTCGATCCGAGCA
AT1G66200.1	373	1	DatasetCV	AAAGATCCATTCCGTAGAGGCAACAACATCCTTGTTATGTG
AT1G66200.3	418	1	DatasetCV	AAAGATCCATTCCGTAGAGGCAACAACATCCTTATTAACGT
AT3G09440.1	1985	1	DatasetCV	CCAGCTGCAGGAGGAATGGACGAGGATGTTCCTCCTTCTGC
AT2G37270.1	582	1	DatasetCV	CTTCTTGCTTACAACTGGTGCACGTGAAGCTGCCTTTAGAA
AT2G29490.1	157	1	DatasetCV	GAAGCTTCTAGGGTTTTGGGCAAGCCCTTTTAGTCGTCGAG
AT3G07090.1	810	1	DatasetCV	GCAGCTCTAATGGCACAAGGCACATTACGAGCAAGTGAAGC
AT5G53460.1	2292	1	DatasetCV	GCAACACGTGTTGCTGTGAGCTCCCTCATGGCTGTTGGTGC
AT3G15730.1	1701	1	DatasetCV	TGGGAGTTCTTTTGCTTGGGCAGCCGATGGTATTACTCCTG
AT1G34030.1	568	1	DatasetCV	GCCAATGTTGCTAGTTGCAGCTGGATTGGATCTTTGATAAG
AT5G36880.1	1907	1	DatasetCV	GATGTTATCAACGTCAGTGGCCATCGAATCGGAACTGCTGA
AT3G44110.1	1055	1	DatasetCV	CTAACCGAAGCTTTGTGTGGCTTCCAATTTGTTCTGACTCA
AT5G64100.1	1158	1	DatasetCV	TTGCTACAGCATTTTGTGGTCGATGGTTACGTTTTGATTTT
AT5G44020.1	132	1	DatasetCV	CTCAAAGGAACCACAACCACCACGAAGACTAGCCAAACCGG
AT5G46250.1	1097	1	DatasetCV	CCTGCTGATGATGACGGTGGCAATCATCAGAAGGATAAAAA
AT3G15730.1	643	1	DatasetCV	TTCTTCTCGCAGAGACAAGGCTGCAAAGTTTCTCTGTACCA
AT1G79550.1	704	1	DatasetCV	ACTTGATTACCTTGTCGGAGCTGTGGCAAACCCCAAGAAGC
AT3G01280.1	752	1	DatasetCV	GTTCAACACTGCGGTTGGAGCCGAAGTGAGCCACAAGTTAT
AT1G29280.1	564	1	DatasetCV	AGGAAGCAAGTCGAGAGAAGCAGAGATGATCCAACGATGAT
AT5G56760.1	918	1	DatasetCV	GGGAATCCGGCGAGACTTGTCGGAGGGAAAGAGAAGCCAAC
AT5G43780.1	358	1	DatasetCV	GTACATGTGCTTAGCGAAGGCTGGGCAAGTCCTCTCAAAGG
AT2G44060.1	1075	1	DatasetCV	AATAAGGAAACAAAGTGCTGCAGAGACAGAATGGTCATAGT
AT3G12490.1	442	1	DatasetCV	AAGTGAAGCATGTTGCTGAGCAGGCTGTCAAGACCATTCAG
AT5G44790.1	2882	1	DatasetCV	AACAGATGTAGCAATAGAAGCAGCAGATTACGTTCTGATGA
AT3G01540.1	1970	1	DatasetCV	GGAAGAGAGCGAGAAAGGAGCCGTAGCCCTGAGAGATTCAA
AT3G16400.1	615	1	DatasetCV	CACGTTTCTTTCTATTAAGACTTTTAAAGGCAAAACCTCTC
AT1G30510.1	725	1	DatasetCV	TTTCTTTGACGGTAAAACAGCGAGTTTGTGTGTACGTAGAG
AT5G45510.1	1799	1	DatasetCV	TGTGGTAGTACCAGAGATGGCGATGAGAAATGTAATTGATC
AT3G01290.1	883	1	DatasetCV	CCGTCTCTGACGTGGCAGCGCAGATTCGAAATGGATTATTA
AT1G12110.1	440	1	DatasetCV	ATTCGCCGCAATCCAAGCCACGGGTGTTTCAATCTTAACTC
AT2G17360.1	689	1	DatasetCV	CTGGAGGAAGAAACAGAGGGCGTGTTGGTGTGATTAAGAAC
AT5G17920.1	1439	1	DatasetCV	CAACCAATGTTAGTGCTAGGCTAGATGCTCAGCAGAAGAAG
AT5G59880.1	542	1	DatasetCV	CCGATCCAACCGAGATGGATCTTGATGTTTTCAAAAGCCGA
AT1G30580.1	1051	1	DatasetCV	AGTGCTGGCAAATAAGACGGCAGTCAAAGGCTCCTCAAGCT
AT1G13930.1	498	1	DatasetCV	TGGAGGTTATGCCAAGATGGCTCAAGGTTTCTTGAAGTGAT
AT2G44490.1	308	1	DatasetCV	AGAATCAGTGATTCTAGCGACGGAAACGTTGCCGTTGATTT
AT2G01450.1	1037	1	DatasetCV	CAAGGATTGGCAAATGTGGACTATGAACCATCGAGGCAACC
AT2G17720.1	773	1	DatasetCV	GAATGGAGGACAACGAATAGCTACTGTGCTTATGTACCTCT
AT4G38630.1	1224	1	DatasetCV	GAGAGTAGTAGCAAAAAAGGCGAGGATGAGAAGAAGTGAAG
AT4G26970.1	1968	1	DatasetCV	TTCGAAATTGTCGGCTACGGCTGCACAACATGCATTGGGAA
AT4G24160.1	1062	1	DatasetCV	ATACATCTTCTCATTTGGAGCATTTGCTAGGAAGCCCCTCT
AT2G13560.1	1107	1	DatasetCV	TTCTTGGAGCAGTTAGAGCACAGGGGCGACCTATGATTGAT
AT2G36290.1	1095	1	DatasetCV	ATGAGATTCCTGGAGCAGGGCATTTGTTCCCGTTTGCTCCA
AT1G70300.1	2418	1	DatasetCV	TATTGATGACCCTGATAAACCAGGGACGTCAGAGATTCGAT
AT4G40030.1	379	1	DatasetCV	TGTCTTAGCTCTCCAGGAAGCTGCAGAAGCATATCTTGTTG
AT1G15690.1	750	1	DatasetCV	CAGCGAGTGGTCTATTGGTGCTTTACATTACTATCAATGTG
AT3G50740.1	1436	1	DatasetCV	AAGAGACCGCTGCCGAATCGCTGAGTTGCGACGGTGGAGTG
AT5G11560.1	1222	1	DatasetCV	CAGGAGTAATGGATTTAGGGCGCTTATTGTGATGGAAGATC
AT5G28540.1	696	1	DatasetCV	ATGCTGGTGTTATTGCTGGGCTCAATGTTGCTAGAATCATT
AT3G14600.1	414	1	DatasetCV	GCAGATGTACACTGAGATGGCTTCTCGTCATAGAGTGAGGT
AT3G63520.1	1466	1	DatasetCV	GAGACAGCAGAAGAAGACGACGGTTACTTGATATTCTTTGT
AT5G25280.1	650	1	DatasetCV	AGGTGAATGGGTGCGAAGAGCTTTGACTACTTTGATTAGAC
AT2G07709.1	1617	1	DatasetCV	TTCTGGATAGATGTGTGGGACAGAGGGCTCGTGGTACCTTC
AT3G12500.1	879	1	DatasetCV	GAGTGTGGACGTGGCCAAGACGGGAGAGTCGCCGATCGTAT
AT1G04040.1	402	1	DatasetCV	TCTAAGTGTGACGGCATGGACGCTTGGATCTTTGATATCGA
AT4G29270.1	349	1	DatasetCV	GTTGGCGGAGACGGCAAGGACGCGTGGGTCTTTGACATCGA
AT5G03380.1	334	1	DatasetCV	ACGTAGATCCAGTGGAAGTTCGTGATAAAGTGGCCGACAAA
AT2G02130.1	252	1	DatasetCV	TGCCACAACGAAGGCTTCGGCGGAGGTAAATGCCGTGGATT
AT2G07709.1	361	1	DatasetCV	GGAGAAGGTTGTGAAGGTGGCCTCGTTATCCACACCTCCGG
AT5G26260.1	906	1	DatasetCV	AGAATCAACGAAGCTCCAACCACAAACAATTATATTCTGCA
AT3G13750.1	2071	1	DatasetCV	TAGCTCATCGGTTGAGTGGGCAGAAGGTGCATTTGTTGCAC
AT5G12250.1	1437	1	DatasetCV	GCAACTGCAGATGACGAAGGCGAGTATGAAGAAGACGAGGA
AT1G66270.1	556	1	DatasetCV	GATTTGGAAGACGAATATGGCGGTTTCTTAAGCCAAAACAT
AT2G40060.1	580	1	DatasetCV	CAGCAAGAATTACTGGAAGGCAATAGCAGAGCTAGTTCCTA
AT5G43060.1	521	1	DatasetCV	GATGTTAAAGATCAAGGAAGCTGTGGGAGTTGTTGGGCATT
AT5G41990.1	1515	1	DatasetCV	AGGTTGAGAGGTGAGAGGAGCGATGATGTCACAGCGTCTAT
AT3G50740.1	1134	1	DatasetCV	CTCTTCTTGGGCTCCCCAAGCGGAGATCTTGGCCCACCAAG
AT1G54100.1	1515	1	DatasetCV	CCACTGGGAAGTGACTGTGGCATTGTGAATGTGAACATACC
AT5G53460.1	3625	1	DatasetCV	ATGCTGGTCTTCCATGGGAACTGGGTCTAGCTGAGACACAC
AT5G07350.1	608	1	DatasetCV	GAAGGATATGGTCGTTGGAGCAAGGTTCCTGGTGCTGCTGA
AT3G11510.1	541	1	DatasetCV	ACTCTGATTGCACGATGAGGCTCATCATCGTTGCAATGTGC
AT5G44380.1	1260	1	DatasetCV	AACCTATTCCTGTGATAGGGCTCAAAGGAATATTCAAAAGA
AT4G21960.1	774	1	DatasetCV	ACTCACTGTGTCAAGCTGGTCCATCGTTTGTACCCTGAGGT
AT4G17340.1	781	1	DatasetCV	CGGAGACGTCTTCATCGGATCCTACGCTCCAGCTCCCACCA
AT2G38800.1	1727	1	DatasetCV	TGTTAGCAAACTTGCCCCAGCAAGGAAGAGGAAAGTTGCAT
AT2G13560.1	1295	1	DatasetCV	CAGGGTCTTATCACCGAAGGCCGGGAAAATATTGACCCAGA
AT5G58420.1	664	1	DatasetCV	CAGGAGGTAGAAACAGAGGGCGTGTTGGTGTGATTAAAAAC
AT3G12120.1	996	1	DatasetCV	TCTTGATCACTTACTTGCAGCACACTCATCCCTCGTTGCCT
AT3G02080.1	250	1	DatasetCV	AGACCGGAAAGTTGAAGGAGCTTGCACCATATGATCCTGAT
AT4G01850.1	642	1	DatasetCV	GTACTACAATGACAATGGCGCTATGGTTCCAGTCCGTGTCC
AT1G66270.1	245	1	DatasetCV	TTAATGAAACTTGTCGTGGACCGGCTCTATGGGATATCTAC
AT5G49720.1	1061	1	DatasetCV	GAGGAGAGGGAGATATAGTGCAGGCACTGCGGAATCTAGCA
AT5G59910.1	398	1	DatasetCV	TCAAGAGGCGTCGAAGCTTGCGAGGTACAATAAGAAACCTA
AT1G36730.1	1048	1	DatasetCV	TAAGAAGAAAGCAGCGACCACGGGTACTTCGAAAGACAAAG
AT3G15730.1	1920	1	DatasetCV	GTACAAGGATGTGATTCAGGCTCTCAGGGCCCAGGGTCTTG
AT1G09970.1	2311	1	DatasetCV	CAATGCCGATTCTCACTGAACGGGAGGGAAGATCGAAAGAG
AT1G56070.1	1069	1	DatasetCV	TGGGTAAACCTCTAATGAAGCGTGTTATGCAGACTTGGCTC
AT1G43170.1	1140	1	DatasetCV	TCACTTCTCACTCAGACTTCCCGTCTTGCCTTGGAGGAGAT
AT3G16460.1	451	1	DatasetCV	TCCGGTTTCCTTGGTACCAGCGGCAATGTTCTCAACACCAT
AT5G53460.1	3675	1	DatasetCV	GTTGCCAATGACCTTCGTGGCCGTACTGTTCTTCAGACAGA
AT5G03630.1	191	1	DatasetCV	TTGCTATCATTTCCAGGGAACAAGTTCCTCCATATGAGCGT
AT3G13920.1	1005	1	DatasetCV	GAGACACTCTGTGATCTCTACGAGACTCTTGCCATCACTCA
AT2G44120.1	998	1	DatasetCV	TGGACCTCACTTCAAGGAAGCCAACAACTTCCTGTGGCCAT
AT5G11560.1	1321	1	DatasetCV	TTCAGTGACTGATGTTACGACGGCAGAACTCCCTCTGGAAA
AT5G53560.1	319	1	DatasetCV	CACAGCGACACTGCAAGGGACATGATGGACAAATATTTCAT
AT4G16190.1	440	1	DatasetCV	TCCTACTGATACTCAGACGGCGCCTATTCTTCCGACTAGCG
AT3G01290.1	446	1	DatasetCV	GAAGAATGAAATTGCCAAATCTGTGGAAGAAGAGCTAGACA
AT1G62660.1	1302	1	DatasetCV	GTCCCCGATAATCCTTCTATCGATGTCGGAATCAGTACCGG
AT3G02360.1	979	1	DatasetCV	GACAAAACCGGCATGAAAGGCACAGGAAAGTGGACCGTGCA
AT1G66280.1	592	1	DatasetCV	AGAACATTGTGAAAGATTTCCGAGAATATGCAGATTATGTT
AT1G61275.1	154	1	DatasetCV	TTTGCAGAACTCACCTCGTGCGGGCCTCCCTACACCCATCC
AT2G31141.1	338	1	DatasetCV	GCAGTGGATGGATCATAGTTCGAAGTCTCTCAGATCCACTA
AT4G05150.1	247	1	DatasetCV	AATCAGCTCTGTTACGTCGGCGGCGATAATCGCATGGTCGC
AT5G27920.1	708	1	DatasetCV	GGCTGCGTTGTCGTCTGCGACGGGGCTGAGAGAGCTGAAGA
AT5G07440.1	648	1	DatasetCV	GTGCCTGCTCCTGATATGGGCACTAACGCTCAAACCATGGC
AT5G09585.1	633	1	DatasetCV	TCCCATGCGTTGCACTATTGCGAGGGCTTGGCTCAACCCGC
AT2G27530.1	501	1	DatasetCV	TGGTCCTGGTCTTAACAAGGCAGGAAAGTTCCCAACACTTG
AT5G02500.1	735	1	DatasetCV	ATCTTCGATCTTGGTGGTGGCACTTTTGATGTCTCTCTTCT
AT5G64740.1	720	1	DatasetCV	GAGTACGAAAGACGAGAAGGCAATCAAGCTTGTCCACAGTG
AT4G29480.1	468	1	DatasetCV	TGCGCAGGTGAAATCGCCGGCAGAGGATTCACCTTCACAGG
AT2G31141.1	362	1	DatasetCV	GTCTCTCAGATCCACTATGGCCCGCTGGTTCGATCTCTCCT
AT3G55440.1	847	1	DatasetCV	TATCGACATCATTAAGGCCGCAGAGGTGAAGAAAAGTGCCT
AT2G07727.1	1360	1	DatasetCV	CACCATTTGTTACTATTGGACAAATTTCTCCTTTGGTTTTC
AT1G03220.1	465	1	DatasetCV	ACTAACGGATCCAATCCGGGCAGGGTCGTTAAAATCCCAAA
AT1G11910.1	1090	1	DatasetCV	CTGTTGTGGATCAATACGGGCAGACCATTTTGGATTTACTT
AT1G76180.1	642	1	DatasetCV	CGGTTCAGCCGTCGCTGCGGCACCGGTGGTTGTTCCTCCTC
AT3G14310.1	1122	1	DatasetCV	GCCACCGTTGCTGCTGTCGGCGAGAGATTCTTAGCTCGTGA
AT4G35830.1	1649	1	DatasetCV	CACCACATGCATTGGAAACTCGGGGGATATCCATGAAGCTG
AT2G32240.1	480	1	DatasetCV	GCTCGAATTGGAAAGAGTTGCAGGGGAACTAAAACGGTATG
AT1G59870.1	322	1	DatasetCV	TGAAGAAGCTCTTAAATGGGCTGCCATTGAGAAGCTACCAA
AT5G61455.1	669	1	DatasetCV	CCATGCGTTGCACTACTGCACGGGCCTGGCTCATCCCGCCA
AT5G44380.1	924	1	DatasetCV	TGAAGACTATTTCTAAGTGGCAACAAATTTCATCCAAGATT
AT4G32410.1	2578	1	DatasetCV	GAAGACAAGACTGAATGGGGCAAAGAGATTGGTTGGATCTA
AT5G52240.1	422	1	DatasetCV	AGGACCATATGCTTTGTTTGCAGGGAAAGACGCTAGCCGAG
AT1G59870.1	3113	1	DatasetCV	CGTCTTCCTAAAGAAGTCGGCAAAGATGAAAAAATGATGTT
AT3G56825.1	770	1	DatasetCV	GCCCATGCGTTGCACTACTGCAAGGGCTGGCTCAACCCGCC
AT5G66390.1	1050	1	DatasetCV	GAGAGATCAGGCGTATCTGTCGGAGGGTTAACCATGCTTAT
AT3G16460.1	454	1	DatasetCV	GGTTTCCTTGGTACCAGCGGCAATGTTCTCAACACCATCGA
AT2G40890.1	1145	1	DatasetCV	TGACCGGATCTTAACCGAGGCAGATTTCTCCCGCTTACCTT
AT4G32410.1	1865	1	DatasetCV	ATGTTTCTCGTGAAAAGCGGCCTGGATTTCAACACCACAAA
AT3G62400.1	209	1	DatasetCV	AGATGCACCATTGGAATGAGCAGAGGAAAACTAGAACTTTC
AT2G20420.1	1289	1	DatasetCV	TAGAAGGAACGAATGTTGAGCAGGGAAAGAGAATCCTCAAG
AT3G13460.1	2340	1	DatasetCV	GGTGTCGCTCACGGCATGGGCATAAAACTGACTAGAGATGA
AT5G20290.1	544	1	DatasetCV	TGAGAAAGATTGCAAGCCGTCAAGAGGGTCGCAGTCTTGAT
AT4G37410.1	1002	1	DatasetCV	CGCTTTGACAATAGAGTGGGCGATGGCGAGTTTGTTGAACC
AT2G32240.1	867	1	DatasetCV	TGACTCTGAGTCGCAGAAGGCTTTGGAATTTTCGGAGCTGC
AT3G19930.1	1444	1	DatasetCV	TGATGCCAATCTAATCGTGGCACTGATCTGCATCTATGTAG
AT1G76680.1	593	1	DatasetCV	TCTTTACCCCTCCAAGACGGCTTGGTATCGAAGAAATCCCC
AT2G46750.1	925	1	DatasetCV	GTAGCGGTCAACACATCGGGCAATGGTTTGTTCGATTTCTT
AT1G11650.1	1138	1	DatasetCV	AAGTCCTTCGAACAAACAGTCGGGGGATCCGAGCCAGTTTT
AT1G13930.1	339	1	DatasetCV	TGGTCAGTACCTCGACAAGGCTGAGAAGTATCTCAACGACT
AT1G69620.1	482	1	DatasetCV	TCTAGCGATAGTACTGGTTGCAGAGAAAAACATTGTGTACT
AT5G08680.1	616	1	DatasetCV	GAACCTATTGACGAGAGAGGCGAAATTAAGACCGAGCATTA
AT3G60750.1	2244	1	DatasetCV	GAGGTGCTCAGGAAAGACGGCAAAACCGTTAGAGTTGTTTC
AT4G38800.1	247	1	DatasetCV	CTTCGTCATCGCTATGCAAGCGGAGGCTCTTCCTTTGGTCA
AT5G48010.1	1729	1	DatasetCV	TTTTAGGTATGTAGAATGTACGGGGTCAGCGATTGCAGCAT
AT5G48010.2	1753	1	DatasetCV	GTATGAGTATGTAGAATGTACGGGGTCAGCGATTGCAGCAT
AT4G23100.1	394	1	DatasetCV	TTAAGAGGAGTAAGAGAGGGCATCAATTGATTGTTGCGGCA
AT2G30520.1	1613	1	DatasetCV	GCAGAAGAATAAGAACGGTGCAGGAGCTTCTTCTTCGAATT
AT3G57765.1	692	1	DatasetCV	CCATGCGTTGCACTACTGCACGGGCCTGGCTCAACCCGCCA
AT2G36530.1	594	1	DatasetCV	CCGGAAACAAGCTTGCTATGCAGGAGTTTATGATCCTCCCT
AT3G46700.1	1024	1	DatasetCV	AGGATACATTGTGAAATGGGCACCACAAATAGAAGTACTAG
AT4G35750.1	730	1	DatasetCV	CGGTCAAGAAAGCGATCACGCGAGGGTTTTCGCCGGAGCCG
AT3G02468.1	1594	1	DatasetCV	ACCTTGAAGTGTGAATGGAGCAGCAACAATAGCTGCAGCAG
AT4G09320.1	499	1	DatasetCV	CTGATGGACCTGTCAACTGGCAGAGCAGCGTTCACCCTTGG
AT4G33090.1	2092	1	DatasetCV	TGATGAGACACTAAAGGAAGCAGTTCGAAGATTTGATGCAT
AT5G17820.1	1048	1	DatasetCV	CAACTAATGAACTACAGAAGCGTGGATATAATATTACATTT
AT4G14880.1	664	1	DatasetCV	ATATGGAAAGGCACTGGTGGCAAAATCGATGGCTTTGTTTC
AT5G53460.1	1758	1	DatasetCV	GACTCAATGGAGAGCATGGGCATTCATGGTTTATTGTCTCC
AT5G39740.1	938	1	DatasetCV	AGTGAAGGCATTAAACGGAGCAGGTGGTGATGATGATGATG
AT4G34110.1	1396	1	DatasetCV	TTACATCTAGCAAGGTGATGCGGGATCCTAATGGAACAAGC
AT3G05560.1	418	1	DatasetCV	GTGATTGCAGCAAACAAGGACCGTAACCTCTATGAGTTGAG
AT1G74840.1	368	1	DatasetCV	ACGGCAAAATCGAGAGGAAACGAGGAGTTCCATGGACTGAA
AT2G32240.1	1380	1	DatasetCV	AGCGCTTGAAGCAAATGTAGCAGAGGTCACAAGTAATGTAG
AT4G35790.1	1766	1	DatasetCV	ATGCTTTGATCCGGATAGGGCGTATATCATGGATTCTGAGT
AT1G24360.1	1110	1	DatasetCV	TGGAAAAGCTGAAGAAGTGGCTGGCTTGGTAGAATTCTTGG
AT2G34430.1	482	1	DatasetCV	GGTTCACAGATCTTCAGCGACGGAGGATTGGACTACTTGGG
AT4G20150.1	335	1	DatasetCV	GCCGTTACTTTGATGAAGATCGGGATTAATTTTGCGTGATC
AT1G22070.1	733	1	DatasetCV	AACTTGTAAGAGCTAGGCAGCAGGGATTATGCGTACGCAAT
AT3G22968.1	852	1	DatasetCV	AGAAACAAGCTAAATGTGGACGTAATCGTTGTAATTGCTTT
AT5G48930.1	1002	1	DatasetCV	TGCAACACCATTGGCTGTTGCAGGGGATTTGTTATCTAAGC
AT3G55410.1	2412	1	DatasetCV	AATGGCTGCGTCAAACCGGGCTTGTTATGCTACTTCCCCAT
AT2G07708.2	490	1	DatasetCV	TATTCGCATAGGTATTGAAGCGGGGATATGAACAGCTAGCT
AT2G15620.1	284	1	DatasetCV	TTCGAAAAGGGATCAATCCTCAGGAGAAGGTTAAGATCGAG
AT3G60750.1	2394	1	DatasetCV	TGGGGAAAGATTGTTGGAGGCAAAGGAAAGTCCATTGGTAT
AT4G32060.1	995	1	DatasetCV	TACTTCTTTGGGAAAGATGGCAGTCAAAAACTGAAACACGA
AT4G18100.1	341	1	DatasetCV	GTTGATGATGCACAACAGGACTTACTGTGCTGAGATTGCTC
AT5G44380.1	1072	1	DatasetCV	GCTGAAGGTTATGGAGAAGGCTTTTCCAGAACTAGGGTTAA
AT4G35830.1	2279	1	DatasetCV	TGGTAATGATGAGATTATGGCGAGAGGCACTTTTGCAAATA
AT1G66270.1	313	1	DatasetCV	GGCGACCACGCCGATGTGGCCGTTGATTTCTTCCATCGTTA
AT1G79040.1	422	1	DatasetCV	CACCGGATTGGCAATTTGGGCGGTAACTCTCGCCGGAATTC
AT2G20760.1	648	1	DatasetCV	AAAGGAGAAGCTATACTGGGCTAACCAAGAGAAGTTCCACA
AT4G37070.1	288	1	DatasetCV	GCGATGTTGACTGTACCGGACGAGACCGGTCGACCTCATTT
AT1G30510.1	1290	1	DatasetCV	GCAGAAGAGAGAGGTGAGAGCTGGGACTTGAAGCTTTCTCA
AT1G03220.1	663	1	DatasetCV	AAAGGCGTCGCCTTCTTCGGCAACGGACCTTACGTTTTCCT
AT3G12490.1	313	1	DatasetCV	GGTTGAACTTTAAAGAGTTACAGGAGTTCAAGCCTGCCAGT
AT1G10670.1	1216	1	DatasetCV	AAAAGCAGAGCCCTTGTCATCGGAGGCGGAATTGCCAACTT
AT2G38700.1	680	1	DatasetCV	AGTTTATTTGGGGGATTTGTCAAGTGGAATATGGGAAACAA
AT3G59540.1	202	1	DatasetCV	GACATTGTGAAGTTCAAGGTCAGGTGCTCAAGGTACCTCTA
AT1G22440.1	995	1	DatasetCV	AGCTTCCTTGATGGAAGAGGCATTCAAGAGTACTCGCCCGG
AT3G23820.1	1490	1	DatasetCV	ACCGACGACGGATCTCGCGGCGGGGCTGAGGAAGTTCGTCA
AT5G60360.1	1220	1	DatasetCV	TGCATCATACCCCGTTGTGGCTTGAGATGATCAGCGAATGT
AT4G02480.1	603	1	DatasetCV	AGCTTTAAAGGCTCCATGGGCGAAGCTACTTTCCCAGTATT
AT3G52400.1	966	1	DatasetCV	GAAGAACACACGGAAGTGGACTTGCTTTGCCATTTTGCTAT
AT5G15200.1	471	1	DatasetCV	ACTCTCGTGTCCTCATCAGGCAGAGGCATATCAGGGTTGGA
AT5G15200.2	471	1	DatasetCV	ACTCTCGTGTCCTCATCAGGCAGAGGCATATCAGGTATTGC
AT5G54900.1	277	1	DatasetCV	CATGAGCGTCTTTGCTCAGTCTGGCGAGGCTACATCAGCTA
AT3G14940.1	323	1	DatasetCV	ATTCTCCAGGATTTACACGGCGAGGATCTCCGTGAAACGGT
AT5G60790.1	604	1	DatasetCV	GTACAGCAGGATGATGGAGGCGGAGAGCGTCTTCAATCTAT
AT2G25450.1	637	1	DatasetCV	AAAGGAAGTGATGAAGTTAGCGGAGTTAATGTTTGAAATTT
AT5G11520.1	960	1	DatasetCV	CTATGGAGAACGAGTTGGAGCTCTCAGCATTGTATGCAAAT
AT1G02840.1	780	1	DatasetCV	AGCCGAAGCAGGAGCAGAAGCAGGAGCAGGAGCAGAAGTCC
AT5G14120.1	1372	1	DatasetCV	GCAGGCAGCTGCAGAAGGGGCGGTTCGGGTGAATAGACGGA
AT5G56710.1	269	1	DatasetCV	TTGAACAAGCAAATCTGGAGCAAGGGAATCAGAGGTCCACC
AT4G39080.1	756	1	DatasetCV	AGGATTCTGTTCCGTGCGACCAGGGGCAACATTTTTATCCG
AT2G21560.1	699	1	DatasetCV	GAGCATGTCAGAGAACAGGGCAAAACAGAGCACTGAAGAAA
AT2G43970.1	1379	1	DatasetCV	AAGGGCGAGGAAGAAAAGGACATGATGCAGATGTAGAACAT
AT1G53210.1	1316	1	DatasetCV	CCATCTGGTCCTGAAGCTGGCCCTCGAACAATGAAATTCCT
AT1G51510.1	201	1	DatasetCV	AGCTGATGTTTCTCCACGCGCGGGACATCCGAGGCTTAAGT
AT3G08650.1	1853	1	DatasetCV	GGCCATAGGATCCATATTAGCAGGGATAGATTACAGCGGAC
AT3G01290.1	881	1	DatasetCV	CGCCGTCTCTGACGTGGCAGCGCAGATTCGAAATGGATTAT
AT4G30170.1	489	1	DatasetCV	CGTGAAGTCGTCGTTTTGACCGGAGGACCAAGCTACCCGGT
AT3G16440.1	614	1	DatasetCV	TTAAGAAAGTGTATATAGGGCAAGCCCAAGATGGTATATCG
AT4G09800.1	382	1	DatasetCV	CAGAAGGATTACAAAGATGGCAAGTATTCTCAAGTTGTCTC
AT1G10522.1	192	1	DatasetCV	TTGCCGGGGTGGTCGCACGGCGGTCTGACAGAAAACAAGAG
AT4G32150.1	724	1	DatasetCV	TCGATAAAACCGCCAATATGCAGGGGAATACATTCCGGTTC
AT1G78850.1	1270	1	DatasetCV	AGTTCGAGGTGTTGGTTGGGCTACGAGCTCAAGACATTGAC
AT3G01420.1	1870	1	DatasetCV	CGATTTACACGAAGAAGGGGCTTGAATGGGTGAATACTACA
AT5G37510.1	1292	1	DatasetCV	GACTTCGTTAACAGAATGGGCTCAGACAATGTATGGTGTGA
AT1G73260.1	373	1	DatasetCV	TCTTCAGAAGTTGATGAGGGCATTCCCGTAAAATTCTCAAA
AT2G37130.1	497	1	DatasetCV	GTATTGTCATGTTGAAAGGGCCAAAGATAGAGATGATAAAG
AT2G47170.1	601	1	DatasetCV	AGATAACTGACAAGCTTGGGCTTCATTCTCTTCGTCAACGA
AT4G34670.1	458	1	DatasetCV	GGTCATTGGTGAAGAAGTGGCAGACTTTGATTGAAGCCCAT
AT3G49120.1	527	1	DatasetCV	GAAAGCTGCGGTGGAGAGGGCATGCCCAAGAACCGTTTCAT
AT1G65960.1	548	1	DatasetCV	TATCCTGAATTAGAATGGGACTTTAGGCTTCCTTTGGTTAA
AT1G66200.1	411	1	DatasetCV	GTGTGATGCTTACACTCCAGCGGGAGAGCCAATCCCTACTA
AT2G18020.1	272	1	DatasetCV	GTTTCAAGAAACAAAAGGAGCTCTTCGTCGCCGCCGAAGGT
AT3G22890.1	775	1	DatasetCV	CAGTGAAGTACAATGATGGGCTTGATCGTTTCAGGCTTTCG
AT3G14990.1	1276	1	DatasetCV	AGCTCTTCAGCTCGGAAAGGCAACACTTGTGTGATTTCAAA
AT2G27020.1	831	1	DatasetCV	TCTGGAAGAAGCAAAGACGGCAGCTAAAACTGCGCTCGAGG
AT2G34590.1	572	1	DatasetCV	AACGCCTTCACCGGTATGGGCATTGGAGCCGCCATGACAGG
AT1G11580.1	1632	1	DatasetCV	TATTAAAGACTCAAAAGAGGCCGAACAATTCACTGTGGCGA
AT3G16420.1	1004	1	DatasetCV	TTATCCAACTGATGATGGAGCTCTTTATCCTTGATTCCATG
AT1G04250.1	577	1	DatasetCV	TTCAGCTCTTTTACCATGGGCAAACATGGAGGAGAAGAAGG
AT5G07440.1	1312	1	DatasetCV	AGGAAAAAGTGAACTTGGAGCTGCAAAAATACATGACTCGA
AT3G22440.1	1082	1	DatasetCV	ATTTTACTTATGAAGTTGGGCTTGTGGATAAGTTCCCTCCT
AT5G53460.1	5704	1	DatasetCV	AAATTGACGTCGTTCAACGGCGGGTTGATCTTATGACCAAA
AT3G15450.1	606	1	DatasetCV	ATTCAGATCATAAAGCAAGGCTGTGCTAAATCGTTTGCTCC
AT5G59613.1	668	1	DatasetCV	TATGGAAACTACTGAGAGTGCTTCAGCTTTCAAACCTGTTC
AT2G36830.1	256	1	DatasetCV	TCTCGTAGCTGCTGCAGTGGCTCATGCCTTTGGACTCTTCG
AT1G78900.1	1798	1	DatasetCV	CTACAACCTAGCCAACCAGGCGGTTGAGAGAGCAGCTGGAA
AT2G21660.1	344	1	DatasetCV	GAGGCTCAGTCACGAGGAAGCGGTGGCGGCGGAGGCCACCG
AT1G78080.1	1092	1	DatasetCV	GCTTGGGACTTTTGACACGGCGGAGGAAGCTGCGTTGGCCT
AT2G15620.1	1693	1	DatasetCV	GAGGGTGCTGACGTGTACGTCGGGGGACGAATAGGAAGTGA
AT1G78850.1	1024	1	DatasetCV	TTTGGTTTGTGTAAGAAAGGCCAGTGTAACGCTTGTCCTAG
AT5G53300.1	566	1	DatasetCV	GTCCACTGCACGAAGCTGGACTCAGAAGTATGCCATGGGCT
AT4G34110.1	1277	1	DatasetCV	TGAACAGAATTTGAAGGAAGCTGCAGACAAGTTTCAAAGTT
AT1G59870.1	579	1	DatasetCV	CTGTTGAAGTCAGGTACGAGCATTTGACGATTAAAGCTGAT
AT3G44310.1	302	1	DatasetCV	GCGTTCATAACGAAGAAGGGCGTGATGAGTTTCGGAAGTAC
AT5G61790.1	1364	1	DatasetCV	ACCACTTGGAAGCCCAAATTCGATGTTGAGAAAGAGAAACA
AT1G20850.1	374	1	DatasetCV	TCAAGAAAATGTATTTAGGGCTCAAGACTGATATAGTGAGA
AT1G65930.1	1359	1	DatasetCV	CATTCACGGCTCAAAGCTTTCGAGGGACACGTACCTGAACA
AT5G64120.1	855	1	DatasetCV	ACAACAACCTAAGCCGTGGGCGTGGAGTTCTCCAATCCGAT
AT3G09630.1	1203	1	DatasetCV	GGCGTTGGCAATCAAAGCAGCAGGCAAGTCGTGGTACAAGA
AT5G02870.1	426	1	DatasetCV	TCAATGTCAACATGAAGAGGCACGCGATTGTTTCTGCAATC
AT3G08530.1	5213	1	DatasetCV	GGTCCTCCACCACAAATGGGCGGTATGCCAGGAATGCCTCC
AT3G25520.1	932	1	DatasetCV	AGTCAAGGCATTGAATGGAGCAGGTGGTGATGATGATGATG
AT1G05850.1	751	1	DatasetCV	GAACTTCAACTACGGAGCAGCTGGGGAAGCCCTGAAAGCTG
AT1G04820.1	293	1	DatasetCV	CTTCTTCAGTGAAACCGGTGCAGGTAAGCACGTCCCACGTG
AT3G01190.1	500	1	DatasetCV	GTTGAAACGGGAAGAAGAGACGGTAGGGTTTCTAACATCAA
AT5G57625.1	575	1	DatasetCV	TGTGGTGTGTGAGAACGGTGCCGGAGTTTTCATCACTTGTA
AT1G56070.1	767	1	DatasetCV	TGCTGGTCTCCATGGATGGGCGTTTACACTGACCAACTTCG
AT1G54630.1	451	1	DatasetCV	AGAGTTTGGGATTGAAATGGCGGAGGAGAAAGCACAGTCTA
AT4G11260.1	372	1	DatasetCV	AAAGCCTATCTCAGAAAGGGCACTGCTTGTATGAAGCTAGA
AT3G11280.1	725	1	DatasetCV	AAAGACGCCAACGCAAGTGGCGAGCCACGCCCAAAAGTATT
AT3G22890.1	405	1	DatasetCV	ATGCATGTATTAAGCGAAGGCTGGGCAAGTCCACTCGGAGG
AT5G53460.1	600	1	DatasetCV	TTCTTGCCAACTGTTGAAAGCAGGAGAGAAGAAAGCAAGAA
AT1G04250.1	366	1	DatasetCV	AGCCAAACCTCCGGCCAAGGCACAAGTTGTGGGATGGCCAC
AT1G47420.1	500	1	DatasetCV	ACACAGATGACAAGGCAGGGCAAGAGGCTTTGAAAAATGTG
AT5G11970.1	389	1	DatasetCV	AAGATGTATGGTGTTGAAGGCAAAGTCAAAGGCTCTTTTAG
AT5G56030.1	2200	1	DatasetCV	GATGCTGATGCCGAAGGTAGCAAGATGGAGGAAGTCGACTA
AT1G48300.1	664	1	DatasetCV	GTTGGATGAGTTTCAAAGGGCGATGACGGGTTTCGAAGGAT
AT5G05170.1	933	1	DatasetCV	GGCTCTGCTGAATGACGAAGCGAGGCAGCCTCTGTCAAGGA
AT4G36040.1	371	1	DatasetCV	GATCTGCCATCCAGACGTGGCGGGAACTGATCGGACTTCTT
AT1G79550.1	710	1	DatasetCV	TTACCTTGTCGGAGCTGTGGCAAACCCCAAGAAGCCTTTTG
AT3G13790.1	685	1	DatasetCV	GCAAGATTCACCGTCGTGGACTAGCCATTACTTACACGAGT
AT5G42020.1	485	1	DatasetCV	ACGTTAAGAGATTGATCGGGCGAAAATTTGAGGACAAGGAG
AT2G18960.1	1834	1	DatasetCV	CAATATGTATCCATCTGCGGCTCTTCTCGGTACCGACAAGG
AT2G32240.1	3155	1	DatasetCV	AAGAGCTCGGGGCCAAATGCCAGGGGCTTGAGAAAGAAAGT
AT5G08680.1	877	1	DatasetCV	GGAGAACGGACCCGTGAAGGCAATGATTTGTACAGAGAAAT
AT4G14880.1	1095	1	DatasetCV	CGATGCGACAAGGAAAGAAGCGGAAGCCATGACCTTCGAGG
AT4G29700.1	994	1	DatasetCV	AAAGAACGCGGAAGTCGTGGCGAAGATGAACGAAGCTTTGA
AT1G70410.1	273	1	DatasetCV	GAAGATCAAAGCGTTGACGGCGGAGCTAAAGGAGCTTGACT
AT2G01250.1	699	1	DatasetCV	AGGACCTCATTTCAAGGAAGCCAACAACTTCCTTTGGCCAT
AT2G01250.2	620	1	DatasetCV	ACAACTCTATTGTAGAGCAGCCAACAACTTCCTTTGGCCAT
AT4G02580.1	632	1	DatasetCV	TCTGTTGGAGAGATGGAGTGCATGGGATGTTGTGTTAATGC
AT1G78900.1	338	1	DatasetCV	TCTGCCACCATCCAAGTTTACGAGGAAACAGCTGGATTGAC
AT2G24550.1	295	1	DatasetCV	TCTTGGCTGATGAATCAGGACGTGGTGGATCACAGATCGGG
AT5G47990.1	957	0	DatasetCV	GGCACTGAAGCCTCGGCGAACACTATACAGTGGACCATGGC
AT5G43780.1	837	0	DatasetCV	CCCGGTGCATAATGGTCATGCGCTTCTTATGACGGATACTC
AT1G34370.1	270	0	DatasetCV	ATCAGACTGTGGGAATTCGACATTCGCAGGTTTTACGTCCC
AT4G23650.1	372	0	DatasetCV	AGGTCGCTTGCAAGTCAATCCCTACGCGCCGCCTTGTTCAC
AT1G62380.1	840	0	DatasetCV	TCATCAATCTTGGTGACCAACTTGAGGTGATAACCAACGGG
AT3G28950.1	719	0	DatasetCV	GGAACTTGAAACAGAGTCTTCTATGTGATTTTGTTTGTGTT
AT1G51200.1	252	0	DatasetCV	GGAAGCGCTGCCACAATGAACATGTGTTCTAAGTGTCACAA
AT1G69620.1	416	0	DatasetCV	AGGCAAAGGAAAAGGTTGCTCCCAAGTGATCTAGACCCTAT
AT1G51510.1	342	0	DatasetCV	CGATTTCGAATCACTTGGTTCAGATGGCCGTCCTGGTCCGC
AT2G07717.1	1461	0	DatasetCV	GGCCGAACTCCATCTTTCTTCTTAACAAGCCCATTTATCTT
AT4G11420.1	2821	0	DatasetCV	CACCAGCAGCACCTTATGTTCCGAAGTGGAAGCGCCAGACT
AT2G19680.1	246	0	DatasetCV	ATTGCTCTACACTCGTCTTGCTAGCATTCCCGGGCGCTACG
AT5G42020.1	517	0	DatasetCV	GACAAGGAGGTTCAAAAGGACAGGAAACTTGTACCTTACCA
AT4G14010.1	94	0	DatasetCV	CTTCTACTAGCACACGTCACCTCCAAGGCATCATCATCATC
AT1G09020.1	925	0	DatasetCV	TAACTGGGCCAGATATGGTTCCTGCTGGTTTTAGCCCAGAG
AT5G08560.1	1213	0	DatasetCV	AATTATATGGGAGATCAGCGCAGATGGGCACATTTCATTGA
AT3G55440.1	709	0	DatasetCV	GAACGTGAGTGCTGATGTCGCTGCTACAACCCGCATCATTT
AT5G17330.1	558	0	DatasetCV	TTCAAGCGTAAATGGCAGAACAAGCGCAAAGCTGAAGGCAA
AT2G17720.1	694	0	DatasetCV	GTCTTCAAGTTCTTCACTACCAAGTTGGGCAGAAGTATGAG
AT2G47000.1	1606	0	DatasetCV	ATCAAGGATAACATTGCGTACGGCAAAGAAGACGCAACAAC
AT1G02780.1	657	0	DatasetCV	ATGTTGCGCCTGTAGCTGCTCCAGCACCTGCTGCTACACCT
AT5G49360.1	1570	0	DatasetCV	TGTGATGGGATTAGATCAGTCGATAGAGGCAGAGACACGAG
AT5G58860.1	1164	0	DatasetCV	CAAGGCTGCTTTGGCTGAAACGCTGCGTTTATACCCTTCTG
AT2G39460.1	153	0	DatasetCV	CCGGCTAAAGTTGATACTACCAAGAAGGCTGATCCTAAGGC
AT2G29550.1	121	0	DatasetCV	CGAAGATGCGTGAGATTCTTCATATTCAAGGAGGTCAATGC
AT5G52240.1	407	0	DatasetCV	GTTCTACGGACCAGGAGGACCATATGCTTTGTTTGCAGGGA
AT1G14980.1	193	0	DatasetCV	CTCCTACCTGAGAAATCCTCCAAGCTGAACTCAGGCAAGGT
AT3G49010.4	324	0	DatasetCV	TGGTATCCCAAAGAAGTTGGCGCCTACAATTGGTATTGCTG
AT5G10450.1	554	0	DatasetCV	GCTGCTGAAGATACCATGCTCGCTTACAAAGCAGCTCAGGA
AT5G52240.1	406	0	DatasetCV	TGTTCTACGGACCAGGAGGACCATATGCTTTGTTTGCAGGG
AT1G54410.1	502	0	DatasetCV	ATCGCTTGAATAAAACAGATCTGGTTCTGGCTATTATTAAT
AT4G15610.1	601	0	DatasetCV	TCATGTTGGAGGAGCAATCGCCGTCTCATTGTTTGCTTCGG
AT1G27020.1	1106	0	DatasetCV	AATTTGTGTGTGAGATATTTCTGTTCTTGTGTTGTGAAGTG
AT1G20850.1	193	0	DatasetCV	CTCATAGAACTCTTCGAAAACTGGATCTCAAATTTTGAGAA
AT2G31390.1	481	0	DatasetCV	CTGATGAACTCAATCTCGACCTCATCAGATCCGCGAAAGTG
AT5G59290.1	642	0	DatasetCV	GCTACTGGGGAAATGTCAACCCTATTGGGGTTCGGAGTTGC
AT2G07811.1	946	0	DatasetCV	CCAATGATGGCCTTTTTGATCTTATTCGTATTCTGATCGAA
AT1G80460.1	1662	0	DatasetCV	GGAGAGAAGGCGAAGAACTCCAAAGTTTTCAGACCCGCTAT
AT5G08680.1	628	0	DatasetCV	GAGAGAGGCGAAATTAAGACCGAGCATTACTTACCCATTCA
AT1G53210.1	1461	0	DatasetCV	TCACCATTAAAGCAGCTCTGCTGCTACTGTTAGGAGCTGCC
AT4G22212.1	446	0	DatasetCV	TTCTGTTTGTTTTGCGTTGTCAAGTATCAAATAAAGTTGGA
AT4G09750.1	697	0	DatasetCV	TGATGGAGTGGAACAATACGCACGGAACAAAAGAATCCAGG
AT1G78150.1	700	0	DatasetCV	GGACAATTTCAACCTCGGAGCTGAATCTCAAACTGCTGAAG
AT3G52360.1	325	0	DatasetCV	CTTCTCTCCGATTACATGGACAAGTTCGAATTCGAAATCCG
AT1G53300.1	775	0	DatasetCV	ATCACTGGAATGACTCAAAGCCGTTCAAGAAGCGATGTTCT
AT1G02500.1	1042	0	DatasetCV	TGGCTCGTAGGGCTCTTGTTCAGGTCTCATACGCCATTGGA
AT1G24510.1	638	0	DatasetCV	TTGCATGACTACTCTGTCCTCGAAGATTGTGAATCGATGCA
AT4G05320.2	689	0	DatasetCV	TGATCTTCGCCGGAAAACAACTTGAAGATGGCAGAACTTTG
AT3G09840.1	1861	0	DatasetCV	CGTGAAATCTTCGACAAGGCCCGTCAATCCGCTCCATGTGT
AT3G16420.1	978	0	DatasetCV	ACAAAATTGGAGTCCATGTTCGTCCTTTATCCAACTGATGA
AT2G47000.1	3947	0	DatasetCV	TCATCGTTGAGAAAGGAAAGCACGACACGTTGATCAATATC
AT2G47610.1	103	0	DatasetCV	TTTGGAGTTGGAGCTTTGGACGACGACAATGGCCCCGAAGA
AT5G42300.1	317	0	DatasetCV	GGTCTTGAGCTTTACTACAACTAGGCCAATCGAAGGAGCTA
AT5G55190.1	521	0	DatasetCV	ACAGGCAAGTCAAGGCCAAGCAGGTAACATTCCACAGGAAG
AT1G01780.1	714	0	DatasetCV	CCTCAGGCAACACTCTTCCACCGGAACCTACCGAAGACGTC
AT5G15650.1	712	0	DatasetCV	GGTATGAACTTGGCTTTTGACCGTGATTTGATTGGCCCGGC
AT1G02840.1	861	0	DatasetCV	TCAAGATCTCCTGGCCCCCGCTCGAAGTCAAGGTCACCGTC
AT1G02780.1	655	0	DatasetCV	AGATGTTGCGCCTGTAGCTGCTCCAGCACCTGCTGCTACAC
AT3G58560.1	510	0	DatasetCV	TGCGATTTGTAGTGTGCATCCATCCGAGACGGCAACATTGC
AT2G23930.1	178	0	DatasetCV	AAATCAAGCTTAATGCTAACCGAATGGTTACTGGAACTCTT
AT2G21870.1	704	0	DatasetCV	TACGAAGAAAATTTGGAGCTCAGCATGGCCAAAGCACAGTT
AT5G58290.1	824	0	DatasetCV	TCGTGATGTCTTCCGTCTTGCCAAGGAAAATGCTCCAGCTA
AT4G24690.1	2247	0	DatasetCV	TCAAAGGCGTGGTAATGGATCTCCTCACAGGGGAGAAGGAG
AT5G27920.1	552	0	DatasetCV	ATTAGACGGCGCCATTTCAACGTTAGGCATTAAGTCACTGA
AT1G20693.1	697	0	DatasetCV	ATCTTTACTTGAAATGTTAACGGGGCTGATTAAAATGGGTC
AT1G24510.1	666	0	DatasetCV	GTGAATCGATGCAAGCGCAGCTTAGCTGAGATTGCTGTTAA
AT4G11260.1	965	0	DatasetCV	GTACCCATCTTCTAAGCCAGCAAAAGACTGGGACAAGTTGG
AT3G04720.1	699	0	DatasetCV	AATGATTTTGAGGTCAATATCGATCGGTCTACATAAAAATA
AT5G07350.1	580	0	DatasetCV	GCTACAGCTTGAAGAGCTGGCCAAGCAGGAAGGATATGGTC
AT4G17340.1	782	0	DatasetCV	GGAGACGTCTTCATCGGATCCTACGCTCCAGCTCCCACCAC
AT2G40060.1	664	0	DatasetCV	ACAAGATCCTAAGAAGCCAACAGTCTCTGTGATTCAAGGTC
AT1G22450.1	481	0	DatasetCV	AGAGGTTAAGACGGAGCAAGCTAAGGAAGAATCTCCTGTTG
AT3G30775.1	1090	0	DatasetCV	TCAGGCGTACTTGAGAGACGCCGGTGAGAGACTGCATTTGG
AT3G02080.1	338	0	DatasetCV	GGGAGGACTTGGTGTTGGTGCTTTCCGTAGAATCTATGGTG
AT2G16586.1	206	0	DatasetCV	CGTTGGAAAGCATGGATCCGCCTAGGCTGTCCCGAAGGTAT
AT1G59870.1	778	0	DatasetCV	TTTGTTGGGTCCTCCTTCTTCTGGTAAGACCACTCTTTTGT
AT5G20290.1	424	0	DatasetCV	ACTATGGTGTTGAGCTTGGGCGCAAGAAGAAGAGTGCTTCT
AT1G73330.1	317	0	DatasetCV	CCTACCCATCAAATTTAAGTCCGAGTTATGGTTTGTTAAGG
AT2G18960.1	1056	0	DatasetCV	ACAGAGATGGAATTGACAATCTCTTGGTCCTCTTGATCGGT
AT4G14010.1	114	0	DatasetCV	CTCCAAGGCATCATCATCATCTCTGTGCAATGGATCTGTGG
AT1G09640.1	646	0	DatasetCV	CCTTGTCGGACACTCTATTACCCTTGCTGATATCATCACTG
AT3G13300.1	1835	0	DatasetCV	TTGTTAAGGTTTATTGTGTTCAGACTCTAGCAATCCAGCAG
AT4G24520.1	308	0	DatasetCV	AAGTCTCTTATGGCTAAGGACGAGGATGATGATTTGGATTT
AT5G40370.1	279	0	DatasetCV	CTAAGTTCAAGGCCGTTGAGCTCGACACCGAAAGTGATGGT
AT3G48990.1	1566	0	DatasetCV	GTTCATCACTGATAACCTCCCCAAAACTGCCTCTGGTAAGA
AT4G23670.1	624	0	DatasetCV	ACCACAACCATCACCGTCATCACTATCTCGATCGATATTGT
AT5G19780.1	1329	0	DatasetCV	ATCGACCACAAGTTTGATCTCATGTATGCGAAGAGGGCATT
AT3G24503.1	639	0	DatasetCV	AGCCAGCTGAACAGACTTCACTCTCTGCTTTGTTCTATGCC
AT3G61430.1	286	0	DatasetCV	ACAAGGACTACAAGGAACCACCACCAGCTCCGTTTTTCGAA
AT3G28345.1	3315	0	DatasetCV	AAAATAGACGAAGCAGAGATCATCGAGGCGGCGAAAGCAGC
AT2G29750.1	1560	0	DatasetCV	AGCTGTGGACGGTGGATCTTCGTTTCTTGCGGTTAAAAGAT
AT1G12410.1	757	0	DatasetCV	AACTAGCCAAGAATACAGGCCAGCCTGCGGAAAGGGTCTTC
AT4G23420.1	52	0	DatasetCV	TGATCAAGAAGACGAGTGGCCTAGGCTAGTGAATTCCATTG
AT4G30170.1	531	0	DatasetCV	GAGCTAGGGAGGAGAGATGGCAGAATCTCCACGAAGGCCAG
AT3G49940.1	495	0	DatasetCV	GATTCGCCGGGTTTCCGTCTCCTACTTCCGACGAAGCTTCG
AT4G05050.4	209	0	DatasetCV	GGAGGATGGCCGCACGTTGGCGGATTACAATATCCAGAAGG
AT3G54040.1	554	0	DatasetCV	TTTACCTGATCTATGTGATGCTCAACGGATGAATCCCCAGC
AT2G07709.1	1436	0	DatasetCV	GGCTAGGGCTGCTTCCTTCCCACCGCGTCCTTCCTTGTGTA
AT4G30190.1	2805	0	DatasetCV	CGGTTTACAGCCAAAAGAAGCTGTTAACATCTTCCCTGAGA
AT5G53460.1	2268	0	DatasetCV	GTTTTGTCTGATCGAGCTTTCTCTGCAACACGTGTTGCTGT
AT2G14170.1	812	0	DatasetCV	GATTCCTTTATGGATGTTTCCTGTTGCAGTGACATGTGGTA
AT4G23630.1	1669	0	DatasetCV	TTCAAGATATTTGAATTTTGCAATCTCGTGGTTAATGTTGT
AT3G01280.1	841	0	DatasetCV	CCTTGACCTCTGTGAAGGCTCGTGTCAATAGTGCGGGTATT
AT1G78900.1	1063	0	DatasetCV	GGAATCTGTCATGAAACGTACCACACTTGTTGCTAACACCT
AT1G18880.1	707	0	DatasetCV	GTTTAGCCATCCCAGCTATTCTAATGCTACTTGGTTGCATC
AT5G63190.1	1052	0	DatasetCV	TGCAGAAAAGAGCTATCTCTCAGCTCCTCACCATGCAGAAC
AT2G21560.1	897	0	DatasetCV	CGAGGGCTCGAAGAAGAGTTCTTGTGTACAACTGAAGAGAT
AT2G45960.1	955	0	DatasetCV	TGGACCATTCATTGGTGCTGCACTTGCTGCTCTCTACCACG
AT5G03240.1	1078	0	DatasetCV	ACTTGGGAGGTGATCTATTTCACCTGGTGTAGTTTGTGTTT
AT5G47990.1	995	0	DatasetCV	GGCGGAGATCATTAAGAATCCTAAGATTTGTGAGAGACTGA
AT3G13310.1	546	0	DatasetCV	CCACGGAGACGGGTACACGCCGGAGCGATGGGTCGGTCGGG
AT2G01520.1	460	0	DatasetCV	GATGACATGCCTGAGCCCAGCAACTACATGAAGTTCGTCAA
AT1G09140.1	868	0	DatasetCV	TTCTCGCTCGCTATACAGCTCTGTCTCAAGGTCCCAATCAA
AT4G20890.1	328	0	DatasetCV	CTCGTGCTGTTCTTATGGATCTGGAGCCTGGAACTATGGAT
AT4G39260.1	466	0	DatasetCV	TACTCAGGAGGCGGTGGCGGCGGATACTCAGGAGGAGGCGG
AT1G62790.1	301	0	DatasetCV	CGCTCAGTTCAACGTCACCACTGAGAAAGCTCTCGGTCTTA
AT2G35743.1	78	0	DatasetCV	TCCATTGCCTTGCGGAGCGGCGTTGCTGCTTTTACCGTTTG
AT3G01390.1	115	0	DatasetCV	GAGGTCAAGGTTCGATCCAACAGTTGCTTGCTGCTGAGGTA
AT4G35830.1	1448	0	DatasetCV	TTGCACAAATACTTCAAACCCTAGTGTAATGCTTGGCGCTG
AT4G34110.1	1251	0	DatasetCV	AGGGAAACAGAATTAAGGGTCCGTTATGAACAGAATTTGAA
AT5G43940.1	220	0	DatasetCV	CTACACTGCTCTTTGTCACACCGACGCTTACACTTGGAGCG
AT5G11970.1	233	0	DatasetCV	GGTAATCAAGGCGGTGATTTCAGGAGCTATAGCGCATCGTA
AT2G36170.1	243	0	DatasetCV	CCTTGGCTGACTACAACATCCAGAAAGAGTCGACTTTGCAT
AT1G32450.1	534	0	DatasetCV	CATTTTTGTCATTGGACTTTCATCGCTATCGCTATCATCAT
AT5G39320.1	1124	0	DatasetCV	CAAGAAAGACACTGGTGACACAAGGGAAACACCTGCCATTG
AT2G44490.1	329	0	DatasetCV	GGAAACGTTGCCGTTGATTTCTACCATCGTTACAAGGAAGA
AT3G09860.1	235	0	DatasetCV	TGGCAGCTCTCTAACCAGTTCAATTACCATGACAAGTGGAT
AT1G01620.1	285	0	DatasetCV	TCGTGGTCCTTCTACAGAGCCGGAATCGCCGAGTTCATAGC
AT1G63000.1	605	0	DatasetCV	GAACTATGAAAATGTATGCACGCTAAGAGTGCGAATGCCGA
AT1G04250.1	432	0	DatasetCV	GATGGTTTCCTGCCAAAAATCAAGCGGTGGCCCGGAGGCGG
AT5G19760.1	466	0	DatasetCV	CTAATGATGGAAAGCCTCTACCGCTGTATCAGAAGGCACTA
AT3G16450.1	230	0	DatasetCV	GGTGTGTCATCTATCAACGTCGTGTATGCGAAGGACTCTCA
AT1G56340.1	275	0	DatasetCV	CAGATTCTACGCTATATCAGCTGAATTCCCTGAGTTTAGCA
AT2G30110.1	3153	0	DatasetCV	CTGGAGGACAAAGGGCTTAGCGCATACAGCATCTCTTGTGG
AT5G64740.1	884	0	DatasetCV	TTCTGAAGGTATGTCAATCTCTCGTCGCAACTCCGGTTTCC
AT5G42080.1	2065	0	DatasetCV	TCCAAGTGATACCGGCATGTCATGTCCACTGTTTTGCTCGG
AT5G44790.1	2892	0	DatasetCV	GCAATAGAAGCAGCAGATTACGTTCTGATGAGAAACAACTT
AT5G42020.1	364	0	DatasetCV	ATTGCCAATGACCAAGGAAACCGTATTACACCTTCATGGGT
AT5G17920.1	1165	0	DatasetCV	CTTGTGGTCTCAACCTCCTGCTCTCTTCTCCACACCGCTGT
AT5G23740.1	189	0	DatasetCV	ATCTGGGAAAGGAAAGAGACCTGGTAAAGGTGGAAACCGTT
AT5G62700.1	1117	0	DatasetCV	GAATGTTCAGAACAAGAACTCGTCCTACTTTGTGGAGTGGA
AT2G16950.1	2619	0	DatasetCV	GCTCACTTGTTTTCATATGCCAAGCCATTGCGAGTTGGCAT
AT1G63000.1	524	0	DatasetCV	TGGATTCAAGGAGGAGGATACTCCTAATTTCACCGGATCTT
AT3G16430.1	286	0	DatasetCV	CAGTACCATTCCAACTGATCCGTTTGTGATTAACCATCCTG
AT2G01021.1	85	0	DatasetCV	ACGCGGATTACGGTGGCGGCCTAAGCCCGGGCTTTTGANNN
AT3G45980.1	387	0	DatasetCV	GCATCGGAATCTTCAAAGCTCGCTAGGTATAACAAGAAGCC
AT3G53260.1	998	0	DatasetCV	GTTCTATTCGAAGCGAATGTCCAAGCGGTGTTAGCGGAGGT
AT1G62660.1	1206	0	DatasetCV	GGACCAGATGTCAAGCATGTCATCAAGGCTAGCATGGACGA
AT5G02500.1	887	0	DatasetCV	GAAGAGTAAGAAGGATATCACCGGTAACCCAAGAGCTCTTA
AT4G34110.1	1726	0	DatasetCV	GATACCAACAGCAGCTTGTTCCTGGAATGAGACCTGGTGGG
AT1G79340.1	763	0	DatasetCV	CCAAAGACAAATCTCTTCCTCTGCAGACCTTGATTGATATT
AT3G14310.1	1335	0	DatasetCV	TTCATCTTCGGAAACGCCGCCGTCGTGCTCCAAGACTGTGA
AT1G51060.1	163	0	DatasetCV	GTCTCCAATTCCCTGTGGGTCGTATCGCTCGTTTCTTGAAG
AT4G16190.1	501	0	DatasetCV	TGGCGTGAACAAGGAGCCGTCACACCTGTTAAAAACCAGGG
AT2G32240.1	494	0	DatasetCV	GAGTTGCAGGGGAACTAAAACGGTATGAATCTGAAAATACC
AT2G14720.1	1673	0	DatasetCV	GAGAGAGATGGACATGCGTTCTCTGCTTGTGTGGACAAGGA
AT2G38800.1	449	0	DatasetCV	GAGAGCTACTTGTTCTTCAACTCTAAAAGATTCCAAGTTTC
AT2G17420.1	748	0	DatasetCV	TTAGGGCGTCTAAGATTATGCAGCAGAGAGCTTTGTCTAAC
AT5G37600.1	1196	0	DatasetCV	GACAGGAGGCCAGCTTCGAACATGGATCCTTACATTGTCAC
AT2G19110.1	1799	0	DatasetCV	CGGCAATGCATGCTCAAGAACAGCTAGGGAATGTTTTAGAT
AT3G14680.1	984	0	DatasetCV	GGAAGGGAATGGAATGAGTACCGAGGATATGATGGAAGAAT
AT3G04730.1	380	0	DatasetCV	TGAAGGAGAAGGTCGTAAAACCACCAGCCAAGGCACAAGTT
AT1G02840.1	547	0	DatasetCV	TCTGTTTCTCGCAAGTGTACCGTGATGCTAGAGGGACAACT
AT4G24620.1	1153	0	DatasetCV	TGGAAGAACATCAATAATGTCTGCAGTTGGTCTGCTTCCAG
AT1G80240.1	808	0	DatasetCV	GTCCCCGAAGGACACCGAGCCATCGAGCTTGTTGGAGGCAA
AT1G77940.1	204	0	DatasetCV	TTACAAGTCTGTTCTCAAATCCCTCCGTGGCTCCAAAGGGA
AT2G17390.1	575	0	DatasetCV	TGCAGCATCAGAGCAGTTTGCAGAGCGTATGGCGCAAATGA
AT4G16760.1	1665	0	DatasetCV	GGCTCTCAGAATGGCTGTTACGTGTGCCAAAAATCTCAGCA
AT5G57625.1	466	0	DatasetCV	TTGAAGGAAGGTCATACAACCACAACACCAACTCGTGTGAC
AT5G65210.1	1463	0	DatasetCV	TGACAACGCGACAAGCGGCTCGAGGATTATTAGCTCTTGGT
AT4G09320.1	420	0	DatasetCV	GCTATTGACATTGGCAGGAACGTGATCCATGGTAGTGACTC
AT3G05165.1	1442	0	DatasetCV	GACAATCATTGGAAGAATTACAAGCTTCGCTTACGGGGACA
AT2G33040.1	898	0	DatasetCV	GAAATATTGCAGAATCTGGCCGAGTTCCAATTCTCTTGTGT
AT4G23100.1	1055	0	DatasetCV	ATTTGCGAATTCCCCTTTTACAGAAGGAAAGCCAAACGGAT
AT3G58680.1	360	0	DatasetCV	GAAGAAAGCCATCATGCAAGCTAGAGGGGAGAAGAAGCTGA
AT5G59290.1	537	0	DatasetCV	GTACACTCAACATGCTCGGTCTTGCCAAGCGTGTTGGAGCA
AT5G03240.1	1138	0	DatasetCV	ATCCCTATCGATTTCGTTTTCATTTTCTGCTTTTCTTTTAT
AT3G17810.1	899	0	DatasetCV	ATATTACTGACATAACTGAGCCTGCTAGGGTGTCACTAAAA
AT1G44800.1	746	0	DatasetCV	GGGCTGCTTTCTTCATTTTACAGTCATACACATTAAAAGTC
AT2G25450.1	745	0	DatasetCV	GCTCTGTCATTGTTTTCCACCCTGTCCTGAGCCAAACCGAA
AT1G79550.1	811	0	DatasetCV	ACACAGTTGACATCCTCCTGCTCGGTGGAGGTATGATTTTT
AT1G09780.1	628	0	DatasetCV	AAGCCGACCTCGTTGCATTACGTGAGAATGGTGTGGATGCT
AT3G22890.1	866	0	DatasetCV	TGCTTTCCAGCTGAGGAATCCTGTTCATAATGGTCATGCTC
AT3G10500.1	1739	0	DatasetCV	GAACCTTGACTTGATCCTTTCTTTGGGGTTGGTCCAAGGGA
AT1G17880.1	114	0	DatasetCV	ACAAGGAAGAACCCTAATCTCAAGATGAATAGGGAGAAGTT
AT2G07717.1	1504	0	DatasetCV	GATTTTGAAGACGGGCGTTGCGTTCGGTTCGAAAGGTATGG
AT5G03545.1	625	0	DatasetCV	TGTTATCCCGTGTGATGCACCATTCAGGTGTGTTCCTATGT
AT2G07719.1	601	0	DatasetCV	CAGGAACTGGGCAAAAAGACCTAGAACTACGGACGTGTCTG
AT2G31141.1	247	0	DatasetCV	TTCATCAGTCTATAATGGGCCTGAAAGAGCTTGTGACCCGA
AT4G32850.1	2477	0	DatasetCV	GTACTCTCAAAGCGGCATGTCGGAAGACCTTCAGTCAAACT
AT5G02500.1	2106	0	DatasetCV	TCTTTCTCCTATCTCTATCTCTTTTACTTGCTTTTTTTTGA
AT1G11910.1	1866	0	DatasetCV	ACTGAAAACTTTAATAAAGCCTGCCTCTTTTGTTTATGCTT
AT1G80380.1	1100	0	DatasetCV	TATTTGCCGGCGTATAAGGCCTATCTTCCAACTCTTTACGC
AT2G24200.1	952	0	DatasetCV	ATGGCTCTGTTAAGACCAAACTTGCTCTTGTTGGAAAAGGA
AT5G10360.1	731	0	DatasetCV	AACTCTGATGCAGCTGATTACCAGAAGCTTCTTGCCTCCAG
AT2G36880.1	1245	0	DatasetCV	AGGGGAGGTAACTTCAGGTTCCAGAAAACCGCTGCGTATGG
AT2G19760.1	165	0	DatasetCV	CGAAGGCAACCATCTCACCGCCGCCGCAATTCTCGGCCAAG
AT2G13560.1	1296	0	DatasetCV	AGGGTCTTATCACCGAAGGCCGGGAAAATATTGACCCAGAG
AT1G79340.1	636	0	DatasetCV	CGCAGCAAAGTGGAAGGCGCCATCGAGTCTCGAGGGTTTCA
AT5G26360.1	1060	0	DatasetCV	AGGTTGAGAAAAACTGACAACAACAGAATCGCCAAGGCTTG
AT1G13930.1	355	0	DatasetCV	AAGGCTGAGAAGTATCTCAACGACTACGAGTCGTCACACTC
AT3G16420.1	1012	0	DatasetCV	CTGATGATGGAGCTCTTTATCCTTGATTCCATGCATCTAAT
AT4G34110.1	1636	0	DatasetCV	CAGTGTATCCCCCGGGTGGTCCTGGTATTGGACAACAAATG
AT5G56760.1	1008	0	DatasetCV	ATCTCGGAATGGTCAGATTACATCATATAAAGTTGTTGTTA
AT5G45500.1	2111	0	DatasetCV	TCCCACAGCGCCAGAGCTTCCAAAGACATTGAAGAAACTGG
AT5G09585.1	540	0	DatasetCV	TGATATGTGGGCCATCGGCCCACACGATATTAACTCTATTT
AT5G54810.1	1431	0	DatasetCV	GAAGAGGAGATAAAGATGTTCAGACAGTGGCTAAATATCTT
AT1G09430.1	1322	0	DatasetCV	TGCGAGCTTTAGGAGAGGAACTTGGTGTCCCTCTAGAGGTA
AT2G07708.1	407	0	DatasetCV	GGCGTCCCGGACATAGCCTTCAACCCGCAAAGGTTAGCTTT
AT5G64100.1	255	0	DatasetCV	GTCTCATGTCCGGTCTATCCCGGCTAATGCACCTGGAATTT
AT4G17340.1	290	0	DatasetCV	GTTGGTGTTTCCATAGCCGCCAACATCTCCGGCGGACACCT
AT1G04820.1	303	0	DatasetCV	GAAACCGGTGCAGGTAAGCACGTCCCACGTGCTGTCTTTGT
AT2G26650.1	2103	0	DatasetCV	CGTTACTCGTCCTAGAGCCACAGGCACCTCTGCGCTCCATA
AT3G05840.1	783	0	DatasetCV	CAAACTTAACCAACGAATGCCTCTCGTTTACGTCAAACTTT
AT1G15690.1	1747	0	DatasetCV	TGCCGCTGGAAACACCACTGCTGCTATTGGAAAGGGATTTG
AT1G09430.1	1296	0	DatasetCV	AAATTACCAGACTGGTTTGGCTAGAATGCGAGCTTTAGGAG
AT5G47990.1	775	0	DatasetCV	TTTCCAACAGGTTTGATGAGCTACTGGAGAAGATTCTTGTT
AT2G36830.1	106	0	DatasetCV	CATTGGCCGTCCAGATGAAGCCACCCGTCCCGATGCCTTAA
AT1G03220.1	1173	0	DatasetCV	GGTTTCGTTGACGGAGGAGTCAACGCAAGAACCTCTGTTGT
AT4G30530.1	687	0	DatasetCV	TTCTCTTCGAGATTGTTGATCGTGTTCTTGCTCTAGGCTAC
AT3G09840.1	1916	0	DatasetCV	AGCTCGACTCCATTGCAACTCAGAGAGGAGGTGGAAGTGGT
AT1G03220.1	1164	0	DatasetCV	ATCTGTTTGGGTTTCGTTGACGGAGGAGTCAACGCAAGAAC
AT2G30490.1	1314	0	DatasetCV	CTAGCAAACAACCCCAACAGCTGGAAGAAGCCTGAAGAGTT
AT2G21660.1	521	0	DatasetCV	GGTGGTGGTGGCGGAAGCTACGGTGGTGGAAGACGTGAGGG
AT4G00355.1	410	0	DatasetCV	GAGAATACTAGTGACCTTACCGAGGCTAGCTTAACGGGGTC
AT1G79230.1	1172	0	DatasetCV	ATCTTGGCAATGGGGCTTCACCGGCTGGGGAAAACCGACGT
AT1G79340.1	1172	0	DatasetCV	ACCAACTGAGGCTTATGGAGCGATGAGCAATTCGATACAGA
AT4G09320.1	427	0	DatasetCV	ACATTGGCAGGAACGTGATCCATGGTAGTGACTCTGTCGAG
AT1G66200.1	223	0	DatasetCV	TCTGGTATGGACATGAGAAGCAAAGCCAGGACTCTCCCTGG
AT1G56450.1	314	0	DatasetCV	TAAGCATTCTCTTCTTGGTGCCAGCGGAGAAATCAGCGACT
AT1G50920.1	1770	0	DatasetCV	TATGGGACTTGATCCGTCTTCTGCAATGGACCGTGCAAGAA
AT1G59870.1	3838	0	DatasetCV	AACATCTCTCTTGATTGGTACAGTCTTCTGGCAAATCGGAG
AT3G46040.1	201	0	DatasetCV	GGAAAGAGGCAGGTTATGATCAGGCCTTCTTCTAAAGTTAT
AT1G77530.1	1108	0	DatasetCV	TTCTATGTGAAATCATATGTCTTTCTTATTCATATTCTGTT
AT2G01140.1	481	0	DatasetCV	TGGCCTCGGCGATTACATCTCTGGTTCCATTCTCTTCGAGG
AT1G11910.1	1675	0	DatasetCV	GCGTATGGTTTTAGTATGAACAATCTGCGTCTCAAGTGTTG
AT3G23820.1	1483	0	DatasetCV	GGTACAAACCGACGACGGATCTCGCGGCGGGGCTGAGGAAG
AT1G13360.1	326	0	DatasetCV	GCGCAAGGTTCCTCTACCGCCGGCGAAACTCAGCCTGATCT
AT1G15750.1	3550	0	DatasetCV	AGCCTCTGCATCTGATCAGCCTCAGAGATGATCTGATCCGA
AT5G62300.1	413	0	DatasetCV	CCTGATGTGGTCAAGCAGATCACCTCCATCACCATTGAACC
AT5G35680.1	250	0	DatasetCV	AAGATGGACAAGAATACGCACAAGTTCTTCGTATGCTCGGT
AT2G01008.1	680	0	DatasetCV	GCGTGTCATGCGTGGGCTGACATGGATTCTTCGAGGCCTAG
AT2G24360.1	836	0	DatasetCV	TAGCTATCAAAATACTTGAGCGGCCAGAGAACAGCCCAGAA
AT1G09760.1	932	0	DatasetCV	CAATCCTGTACGGTTTCTGTCACTTCCTTAGGAACTCATGC
AT5G49360.1	1629	0	DatasetCV	TACCGGGTTATCAACAAGACCTAGTGACCCGTGTAGCTCAA
AT4G37180.1	204	0	DatasetCV	AGGATCAAAGACAATCATTCCAAACTGTCTGAAATCGATGG
AT5G40760.1	635	0	DatasetCV	CTTCTAGAAGACTGTTTTATCTTGCACTTCCACCGTCTGTT
AT5G01750.2	751	0	DatasetCV	GCGTTCTTGTGTTGTTTACGCCGGCGAATCTGACGCCATTG
AT4G34110.1	1445	0	DatasetCV	AGGTTTTGTTGCTTTCGCAACTCCCGAAGAAGCAACTGAAG
AT1G09640.1	925	0	DatasetCV	TGCTGAAGAGGAAGAGGCACCAAAGCCCAAAGCCAAGAACC
AT2G21870.1	801	0	DatasetCV	AATTCCAGGATGAGGAAATGCCGGACGTGAAGTCTCTAGAC
AT1G03220.1	584	0	DatasetCV	TCACAACATCGGTTTACCGTCGCAATTCGCCGCCGCGTTTA
AT2G46370.1	1626	0	DatasetCV	TCAGGAGAAACAAACGAAGACGTTCTTCAAGATTGCTGCAA
AT4G40030.1	348	0	DatasetCV	TCAAGACTGATTTGCGTTTCCAGAGCCATGCTGTCTTAGCT
AT1G62660.1	1182	0	DatasetCV	AATGGGCTCGATACTTCGGTCAACGGACCAGATGTCAAGCA
AT3G53870.1	547	0	DatasetCV	CATGGTGTCATCTGGTCAACCAACTAAGGAATACATAGACT
AT1G74920.1	944	0	DatasetCV	TCAGTTGGTGAAGCCTGTTTCTATGGAACTTGGTGGGAAGA
AT1G78850.1	1297	0	DatasetCV	CTCAAGACATTGACTAGAACCGGAGATTCTTCCCTGGTTGC
AT5G01210.1	1003	0	DatasetCV	ACGAGCGAGGAATCTCGATCCGAGCAAGACGACGACGTTTC
AT4G39350.1	1863	0	DatasetCV	CACGTCTAGTGTATGTTTCTCGTGAGAAGCGGCCTGGATTT
AT3G28950.1	225	0	DatasetCV	ATCGCACAGCCGATACAGTCCCCGCCGTTCTCCATGGCTAT
AT5G65050.1	655	0	DatasetCV	AGAAGGTGACAGAGGAATGTCATGGGAAAATGGCTCCGGCA
AT1G30580.1	894	0	DatasetCV	GGTGTGTTTGAAAGGAGTCTCGCTGATATGGCCCCAGATGA
AT5G12310.1	1041	0	DatasetCV	GAGGGCAATGAAGCGTGAAGCTGCAAACAAAGCTGCGGAAG
AT2G36880.1	1328	0	DatasetCV	CAAGCCGCTCAAGCCAAAGGCCTAGACAGAAACAAAGCTGG
AT1G80460.1	1671	0	DatasetCV	GCGAAGAACTCCAAAGTTTTCAGACCCGCTATGGAAGAAGG
AT3G09630.1	1134	0	DatasetCV	TGAAGCACAGAGAGTTAAGGCTAAGAAGGAGAAGCTCGCCA
AT2G38040.1	1597	0	DatasetCV	AACATGAAGAAAAGGGAAGCCGTGTTCTCAGATAGCCGGAA
AT3G18780.1	1392	0	DatasetCV	ACAGATGTGGATCTCCAAGGCCGAGTATGATGAGGCAGGTC
AT4G01100.1	1104	0	DatasetCV	CGGGTGGAAAGATGCTTCCGCTATTGTAACAGGCGAAGGGA
AT2G04780.1	1015	0	DatasetCV	AAAGTCCTCACACAAGAACTCCGGACAAAAGCTGCTACTTG
AT4G11260.1	698	0	DatasetCV	AGTACCTAAGGAGAACGTAACTGTCGAGTTTGGTGAGCAGA
AT4G32410.1	2420	0	DatasetCV	AGAGGTCTATTCTAATGTCCCAGAGGAGTGTAGAGAAGCGT
AT1G63000.1	727	0	DatasetCV	TGACAATCCTCGATGAGCTTCTCCCGATATCAATCGAAATG
AT5G20250.1	2335	0	DatasetCV	GAACTTATTGTTATGCCATACAATGTGTCTCTTCCAGTCTC
AT5G17330.1	884	0	DatasetCV	GGCAAGTGGAGGATTCATTGCACCGTTTTTGTATCCGGAAT
AT3G53990.1	503	0	DatasetCV	TTGTCATGGGAAGCAGAGGACTCAGTGCTCTTCAAAGGATA
AT2G35630.1	306	0	DatasetCV	CCTAAGGACCCTCGTCTTCGCGATTTTGGTCACTTGTTTAG
AT5G43780.1	475	0	DatasetCV	ATGTCGGTTCCGATCGTCCTCGCTATCGACGACGATCAGAA
AT4G35310.1	1572	0	DatasetCV	ATGGATGCGGCTGATGTAGACAACAGTGGGACAATAGATTA
AT1G65930.1	1042	0	DatasetCV	GGTGATGTCCAAAGTGATTTCTTGGCACAAGGATTCGGGTC
AT5G20290.1	654	0	DatasetCV	GGGCGTGCTGATGGATACATCTTGGAAGGTAAAGAGTTGGA
AT5G64740.1	602	0	DatasetCV	CCAAGAGCTGAGTGGACAGACATGTCAAATCTGCAGAGATG
AT3G11340.1	1054	0	DatasetCV	TGCAACAGGCGGATTCTTAACACATTGTGGATGGAACTCAA
AT4G30270.1	679	0	DatasetCV	TCTTGTTTCCAAAGAACAAGCCGATGAGGATGTACGCGAGT
AT5G60660.1	791	0	DatasetCV	AACGAAAAGGCCTGGGACGACCAATGGATTTTTTGGGTTGG
AT1G10940.1	366	0	DatasetCV	TTTTTTTTGTTTGGGTTTTTCCTTTCTGTTTTGTGTGTTTG
AT1G78080.1	1277	0	DatasetCV	GTAAAAGCATGGCGGAGACTCAGAAACAGGACAAATCGACG
AT1G36980.1	485	0	DatasetCV	CGCACAGGCACATACTTCATCTCCGACTCAGATTCATACTG
AT4G39090.1	1123	0	DatasetCV	CGGCTAGGTTCAAGGAGAAGCCTTACTGGATCATCAAGAAC
AT5G53460.1	4707	0	DatasetCV	GATGTGGACGGAAAGTTTAACACCAGATGCAACCTTGAACT
AT5G19550.1	1117	0	DatasetCV	AGCAGTGATATGTACAACAACTGGACCATCGAGCTGAAAGA
AT3G13330.1	5287	0	DatasetCV	AGCATGTGACCTTACTGGCTCGGTTCGCGGGTGAACCTACA
AT3G11340.1	1039	0	DatasetCV	AGTTTTAGCTCACCGTGCAACAGGCGGATTCTTAACACATT
AT5G48000.1	423	0	DatasetCV	TTGTTTCGGACAAATATTTTCGGATCGAACACCGTGGTTTT
AT1G14320.1	601	0	DatasetCV	GTTTAACAGAGCTGACTTCACCAAGTTGAGGCAAGAGAAGC
AT5G58290.1	793	0	DatasetCV	AAAAGTATCTCGGCGAGGGACCTCGTATGGTTCGTGATGTC
AT2G05440.1	233	0	DatasetCV	GAGGGGGAGGAGGCCACGGACATGGAGGACACAACGGAGGA
AT4G24160.1	914	0	DatasetCV	GGGGTCCAGGTCTTGTAAATCGGTATACAACTGCAAGATTT
AT2G43970.1	1524	0	DatasetCV	GGATCAAGGGAATGAGAAAGCGGCTGGGCAGAGAAAAGGGC
AT2G44060.1	1017	0	DatasetCV	ATCAAGGAAGGTGGAGAGACCCGTCTGAAGAAGGAAGATGA
AT5G42080.1	2073	0	DatasetCV	ATACCGGCATGTCATGTCCACTGTTTTGCTCGGTTCTGGTC
AT4G01850.1	793	0	DatasetCV	GACAAAACCATCTTCCACCTCAACCCATCAGGCCGGTTTGT
AT1G11910.1	1753	0	DatasetCV	GTAGAAATGGTGGCGCAGTTCCTTTTAAGTTGTTTCCTAAC
AT4G11260.1	181	0	DatasetCV	AGAAAGCTAAAGAAGCTTTTCTAGATGATGACTTCGATGTT
AT2G36830.1	732	0	DatasetCV	ACTGGGTCTACTGGGCCGGACCTCTCGTCGGCGGTGGAATC
AT4G23630.1	1548	0	DatasetCV	GTGAATGAACTTGGAATTTTCCTGACTGGTTTGTTCTGTTG
AT5G54810.1	1487	0	DatasetCV	AAACACTTATGTTTGTTTTTCAGTTATTCAGACAGAATGAA
AT2G18020.1	470	0	DatasetCV	CCATTGTTATCGCTCACAACCCTGACAGCGACACTACTAGG
AT5G59090.1	1048	0	DatasetCV	AAAGTTGTTCTCGGAAACGGCAAGACACTTGCCGGGAGGTC
AT4G32410.1	1781	0	DatasetCV	GAGATCATCCTGGAATGATACAGGTGTTCTTAGGCCATAGT
AT5G09585.1	486	0	DatasetCV	CTCGGCCTTTTGGCTAAGATCAAGTGTAGTATCTGTTCTTA
AT5G46250.1	1198	0	DatasetCV	CATTGGACATGGAACAGCTTCATCATCTTCTCATCCTAATT
AT5G08560.1	1362	0	DatasetCV	TTGATTCAGGAGACTGTGTTCACATGTATGAAAAAGGCGGT
AT2G36830.1	262	0	DatasetCV	AGCTGCTGCAGTGGCTCATGCCTTTGGACTCTTCGTCGCTG
AT5G56980.1	1234	0	DatasetCV	TGGCTCGCGGTTTTGTTTGCCGCCGTTTTTCACGTAGGAGA
AT5G03545.1	622	0	DatasetCV	TGTTGTTATCCCGTGTGATGCACCATTCAGGTGTGTTCCTA
AT3G01190.1	875	0	DatasetCV	GCTGCTCTACTCGACAACTCCAAGACTAGGGCTTATGTCTT
AT3G12580.1	1517	0	DatasetCV	TCGAGCTCAGTGGTATACCACCTGCTCCACGAGGTGTACCG
AT1G20450.1	709	0	DatasetCV	GAGTCGTTTGTGGCCAAGCACGAAGAAGAGGAACATAAGCC
AT2G28550.3	1182	0	DatasetCV	CAACACTAATGGTAGAGAAGCAGTCACGAACTTCGAGATGA
AT3G19820.1	502	0	DatasetCV	CTCTCGCTGTTGTTGCTGAGCTTGATGACCTTACCGTTGGT
AT2G38800.1	622	0	DatasetCV	GCTTCATATCGTTGAGGAGACAGAGTTTGAAGTCACAAAAG
AT2G22680.1	954	0	DatasetCV	GGTAAAGGCTACGAGACTTACTCCGTCGTCATGAAGGTGAA
AT5G11670.1	525	0	DatasetCV	ACTGTTCCTCTGCAGCGTTACATGGCCCTGATGGATCTTCA
AT3G01540.1	2036	0	DatasetCV	GGATCTCCTCCTCGCAGCTTCCACGAGACGATGATGATGAA
AT3G02468.1	1575	0	DatasetCV	CTGTGGATCGCCTAGATCTACCTTGAAGTGTGAATGGAGCA
AT5G15650.1	802	0	DatasetCV	GATATGTGGGCTGGTTGGTGCATCAAGGTGATCTGTGACCA
AT1G51060.1	140	0	DatasetCV	AACAACAAGAAGCAGCAAAGCCGGTCTCCAATTCCCTGTGG
AT1G07920.1	472	0	DatasetCV	CCTTATCATTGACTCCACCACTGGTGGTTTTGAGGCTGGTA
AT3G24180.1	2230	0	DatasetCV	TTCCTCACGATCTGGGGATGCATGATCCTTGGAATGAAATG
AT1G20840.1	1800	0	DatasetCV	AGTTCCATCTCTGCGTCATTCCTCATCAGCGGTTTAACAAC
AT3G14310.1	1091	0	DatasetCV	CGTTGTAGACGGTAGCACCACTTTCCACTCCGCCACCGTTG
AT1G63940.1	445	0	DatasetCV	CGCACCTTATGAGAGACCGGCTTTGACAAAAGCTTACTTGT
AT1G76680.1	585	0	DatasetCV	TGAAGCTCTCTTTACCCCTCCAAGACGGCTTGGTATCGAAG
AT5G64340.1	2075	0	DatasetCV	AGGTCACTTTCTTCTTCTCTCTGTGTGGAATGAAAAGCCAA
AT5G01750.2	603	0	DatasetCV	TTAGAGGAGGGAGTACGGATCAGCGTGATCTGCTGTACACG
AT4G30170.1	616	0	DatasetCV	TCAACGGCATGTTTAGCCGTCACGGCCTCTCTCAAACCGAT
AT4G05050.1	675	0	DatasetCV	TTCCTCCGGACCAGCAGCGTCTCATCTTCGCTGGAAAGCAG
AT4G14270.2	443	0	DatasetCV	TCAGAAGAAGTACATGAATCCGAACTTTAATTGTCGCCGGA
AT5G28020.1	908	0	DatasetCV	GTAGATATATTGGTCGCTGGCGTAGGGACTGGTGGAACTGC
AT5G17920.1	1318	0	DatasetCV	GACGAGGCTCTTTTCTCTGCCAATGCTGCGGCTTTGGCTTC
AT5G09810.1	1329	0	DatasetCV	GTGTCTTGTCTTATCTGGTTCGTGGTGGTGAGTTTGTTACA
AT1G47420.1	639	0	DatasetCV	GCCTTTACCAAATGATATAACCGATGCGCTGCGTACTGCTT
AT1G78150.1	1030	0	DatasetCV	GGTGTGTGTTCTTGTGGTTTCCCATACACTTCAGCTCAAAG
AT2G40890.1	1134	0	DatasetCV	GTGGTTGGACTTGACCGGATCTTAACCGAGGCAGATTTCTC
AT4G39090.1	980	0	DatasetCV	TGTCAAGAACGGACCTCTTGCTGTAGCCATCAACGCTGGCT
AT1G79230.1	972	0	DatasetCV	TTGATGGTACTGCTCCAGAACCCCGTAAGGGAATAAGAAGC
AT1G15405.1	18	0	DatasetCV	NNNAACGTGGGCTTGTGACCCGTGTGGGGACAATAAGTTGG
AT2G21520.1	750	0	DatasetCV	ACGAGTTGCTTCCTGATAGACACGATGATTATCATATGATG
AT5G13850.1	480	0	DatasetCV	GCAGAGCAGTTCAAGGCTCCCAACCTCAGCAACGTGATTTC
AT1G80460.1	1739	0	DatasetCV	GTGCAAAGCGGTGGAAAGAACATTTGATCTCGCTGACCTCT
AT2G31570.1	311	0	DatasetCV	GGTTGGAGATATTAGCATTCCCGTGTAATCAGTTCTTAGGA
AT1G09640.1	1446	0	DatasetCV	AGAGAATGGTTTGGTACTTCCATTTACAGGTTTTGCAGCTG
AT1G51060.1	452	0	DatasetCV	GAAGACCGGTGCTTCCAAGCCATCTGCTGAAGACGATTGAT
AT2G07708.1	918	0	DatasetCV	GAAGAGGAGGCCTGAACCAACAGGGATGAAACAGTATAGAT
AT5G62575.1	262	0	DatasetCV	TGAAGAGGATTGGTGATGTGCTCACTGTTGTTGTTGTTGCA
AT1G02360.1	904	0	DatasetCV	GAAATATGTATGTTTATAAACAAAAAGTCAACATGTATGTT
AT2G01250.2	520	0	DatasetCV	CCCTATGTCACTTACGGATTCCCTAACTTGAAGAGTGTCAA
AT2G21170.1	781	0	DatasetCV	GATGCTGTGCCTAGCTGGGACAATATAGTTGTTGCATACGA
AT1G27770.1	2348	0	DatasetCV	GCAGGTGATGGCACGATCCTCGCCCATGGATAAGCATACTT
AT2G07708.2	439	0	DatasetCV	CTCTCTTTATATAAAGAGGGCTTTGCGCCTTCGGATAAAGG
AT1G11840.5	778	0	DatasetCV	TCATGCTTCGTGTTGGTGATCTCGACCGTGCCATCAAATTC
AT1G11580.1	1661	0	DatasetCV	TCACTGTGGCGAAGCTTATTCAAGGAGGATTATGGTTGAAA
AT3G16440.1	306	0	DatasetCV	CATCGTAGCAGTGCAGGTGACCTATGACAAAATATTTGGCT
AT1G67870.1	781	0	DatasetCV	GGATGCAGCACCAGGGCGGGCACAGAATACAGCATCAGGGC
AT5G64400.1	316	0	DatasetCV	TCTGTGATGGGTCCACGAACCATTCAGCATGAGGCTGTTGA
AT2G21520.1	837	0	DatasetCV	AAATGTGGGCTGATATGATTCAATGGAGGAAAGAGTTTGGT
AT5G10360.2	545	0	DatasetCV	GCTGACAAGAAGAAGAGAATCGCCAAGGCTAACTCTGATGC
AT3G57450.1	19	0	DatasetCV	NNATCGTCTCCGTCTCCTCTCTCTCTATCCACGAGAAAGAG
AT1G49240.1	1360	0	DatasetCV	AAACTAAAGAGACATCGTTTCCATGACGGGATCACATTTCT
AT3G19450.1	808	0	DatasetCV	TCGGTCTAATGGCGAGTGGGCTTAAAGGAGGGATTCTAGGG
AT3G15810.1	453	0	DatasetCV	AGAAACCGATATTCAGCGTCCGTAGATCGTCGATAATCGGA
AT2G31610.1	518	0	DatasetCV	GTGGAAAGCTCCGTGCTGCACGTGCTAAGTCCATGAAGTTC
AT3G06700.1	214	0	DatasetCV	CCCCAACCAGAGGAATGGACCCTAAGTTCCTGAGGAACCAG
AT3G22440.1	1061	0	DatasetCV	GACAACAGCTTGATGCTGTTCATTTTACTTATGAAGTTGGG
AT2G25450.1	578	0	DatasetCV	GATGTTCCAAAAGCACAGGACTTACCTGAGGTTTGTGGGGA
AT1G75750.1	395	0	DatasetCV	CCATAAGAAGAAACAAAGCTCTTAATTGCTGCGGATAATGG
AT1G28330.1	613	0	DatasetCV	GTGTTAGTTTCTGTTTTGGGCTGTGTTTTGCAAGTTTTTGT
AT1G67870.1	670	0	DatasetCV	ACCAGGGCGGGCACGGAATGCAGCACCAGGACATGCATGGG
AT2G20360.1	1078	0	DatasetCV	GTGAACAAAGTCCCGTTCCCCTTACCCTCTCCTCAGATCTT
AT2G21520.1	741	0	DatasetCV	TGTTAATGGACGAGTTGCTTCCTGATAGACACGATGATTAT
AT1G47420.1	524	0	DatasetCV	AGGCTTTGAAAAATGTGTTCCGAGCAGCTGAAGCTGTAGAG
AT5G08560.1	1457	0	DatasetCV	ATGACAGACCGAAGCATCTGCATGTGGGATTTAGATGGTAG
AT2G38800.1	1780	0	DatasetCV	CATTTGAAACCGTGCAACCACATGGTAGAGAACCTGAACAG
AT2G18280.1	662	0	DatasetCV	GTGAGACAGCTTGGCCCGCTCGAGCTGCCGTTGTCTCTTGT
AT2G07719.1	418	0	DatasetCV	AAGGTCTAGACTTGCTTTTACTACTTGTGGGTCTCCTGCTC
AT2G27830.1	633	0	DatasetCV	ACGCCGTTATCAAATCCAGGCGAGCTTCGAAGACCGAAAAC
AT4G33090.1	267	0	DatasetCV	CCTCTAAGGCGCTTGCAGCTCCAAAAGTTGTCTTGTTTGAG
AT3G16420.1	439	0	DatasetCV	CGATGAGGGTACTCACTTCACTCTACAAGTTAAAGACAAGA
AT5G61780.1	2536	0	DatasetCV	GGTTGGCGATCAAAAAGTAGCTTCGATTCAAAACCAGCTTG
AT1G65930.1	1212	0	DatasetCV	AGCCTCTATTTTTGCTTGGACTCGTGGACTTGCACACAGGG
AT3G61440.1	945	0	DatasetCV	GGTCCACATGCTATCACAGGCAATGGTGTTGGATTCAAACC
AT1G30510.1	570	0	DatasetCV	GGAGAAACTTGTCATATCGTCATCGATCATGATGGTAACCT
AT1G05260.1	699	0	DatasetCV	AATTTTACGGGTCGTGGAGGCCAAGATCCGGCTTTGGACAG
AT5G59420.1	566	0	DatasetCV	GGCTATATCTGTTTACTATGCCTTCCAACGAACTTGGAAGC
AT3G15730.1	706	0	DatasetCV	TTTGTCCCTAGAATTCCTCTCGCTGGAGGGAAGAACTATGA
AT4G16190.1	1102	0	DatasetCV	ACAAAATCTGCAGAGGGCCTCATAATATGTGTGGTATGGAT
AT1G50920.1	1746	0	DatasetCV	GAGAATGGGTAGGGAGTTATCAGCTATGGGACTTGATCCGT
AT5G11520.1	811	0	DatasetCV	CGATCAAAGGGATTGATGCCCTTCTTCGATAGTGCTTATCA
AT1G29280.1	623	0	DatasetCV	TGAGCATAACCATCCTTGGCCTCTCACTTCTTCCACAAGAA
AT2G20630.1	686	0	DatasetCV	TTGCTAACGTTGGAGACTCACGTGCAGTGATGTCAAAGAAC
AT4G34700.1	257	0	DatasetCV	GAATCGACAAACTGATTGCTCATGGTGAAGCAGAATACAAC
AT5G01210.1	1158	0	DatasetCV	ATCTCAGGTGGTCCGCCGAACAGTTACACAGGAACGTGGTG
AT4G20390.1	449	0	DatasetCV	GAAGAACGGAAACAAGCACGCCAAGTGGAACAAAGTCTGCG
AT4G34200.1	1416	0	DatasetCV	ATATGTCAATTTGGTCAACGCTGATTTCACAGCCAAGCAGA
AT4G35830.1	1707	0	DatasetCV	GATAATGACTTGGTGGCATCCGCTGTGTTGTCTGGGAACAG
AT2G18960.1	1514	0	DatasetCV	AAAGGTGCTCCCGAGCAGATCCTTGACCTTGCCAATGCCAG
AT4G14880.1	1231	0	DatasetCV	TTTGCTTCCATCTGTATCTTCTCTTGTGTGCCAATAAAAGT
AT3G57870.1	298	0	DatasetCV	TGCACTTCAGTGAGGATTATCCGAGCAAACCTCCGAAATGT
AT3G44310.1	314	0	DatasetCV	AAGAAGGGCGTGATGAGTTTCGGAAGTACCATGCTTCTGCT
AT5G08690.1	918	0	DatasetCV	AATGTGCCCTAGTGTATGGACAAATGAATGAGCCCCCGGGT
AT5G48010.1	1889	0	DatasetCV	TGGGGAGTGTGTTTTATATACGGGACCTTCTTTGCGGTAAG
AT5G08690.1	1002	0	DatasetCV	ATTTCCGTGATGCTGAAGGCCAAGATGTCTTGCTTTTCATT
AT1G09640.1	1461	0	DatasetCV	ACTTCCATTTACAGGTTTTGCAGCTGGGGCTTTACATATCT
AT5G53350.1	854	0	DatasetCV	TAACATTCTCCTGATGGGACCAACTGGGTCAGGGAAGACAC
AT2G17500.1	1148	0	DatasetCV	TACTTGGAATAGTCTGTGTTCGGTACATAGCTATGCCAATT
AT3G49010.1	638	0	DatasetCV	CGCACTAACAAGAGGCATGCCGGAGCTAGAGCCAAGAGAGC
AT2G21520.1	972	0	DatasetCV	GACCTATTTACATTGAAAGGCTAGGGAAAGTTGATCCTAAC
AT1G79550.1	920	0	DatasetCV	AAAGTCACTCATGGAGAAAGCAAAGGCCAAAGGTGTCTCTC
AT5G17920.1	1594	0	DatasetCV	AAAGCCATCAAGGAAGAGATCAAGAAAGTTGTTGACCTCCA
AT3G63200.1	511	0	DatasetCV	GCCCTCCTTGTCGCCGACGACGGCTCCGGCAGGCCGATGTT
AT1G03220.1	638	0	DatasetCV	ATTCGCCGTCTGTCTAACTTCCGGTAAAGGCGTCGCCTTCT
AT3G08580.1	647	0	DatasetCV	GGAGCAGCTGGTGCCTCTTCCCTTCTGTTTGTGTACTCCCT
AT5G61455.1	787	0	DatasetCV	GTTATGTAACTGGTGGATGACCGTTGAAACCCTCATACGCG
AT4G38470.1	820	0	DatasetCV	CAGGTGCCAGAACGCATGTTCCAATACCCAATGACGGAACT
AT5G48020.1	574	0	DatasetCV	TGGTCCTAGGCCATCTAACACACGGTTTAAGGAGCTTAATT
AT5G25460.1	1141	0	DatasetCV	TCATTGTGTGGGCCTGTGATCGATGATGTCAAGCTTATAAG
AT2G38700.1	544	0	DatasetCV	TACTGCTGCTGGCTTAGCATCTTCTGCTGCTGGTTTTGCTT
AT2G23090.1	178	0	DatasetCV	AAATCAGCCATGGCTCGTGCCAAAAACTTGGAGAAGGCTAA
AT1G13930.1	323	0	DatasetCV	ATGAAAAGAGTAGCACTGGTCAGTACCTCGACAAGGCTGAG
AT5G27700.1	407	0	DatasetCV	CGAATCTTGTTTTTTTTTTTCCGAAAGATTGCCTCATACTG
AT3G24180.1	2465	0	DatasetCV	CCCAGATCAGACATATGATACATGGACTGTTCATGGCGTGA
AT2G21870.1	745	0	DatasetCV	GGATGAGCTGAAGAGTGATGCTGTTGAAGCTATGGAATCTC
AT1G78850.1	949	0	DatasetCV	GTGACATACACGGCGTTTACCAACGCCGACACTGACGGTAA
AT5G53902.1	496	0	DatasetCV	TGCTGTAGAGGATCGTTACTCGGCTCGGTTTCTACCTTGCC
AT3G13920.1	1534	0	DatasetCV	CTCTTTGATCTGATTTTGACCCGTCGTCTATCAGCGATTTA
AT4G29700.1	966	0	DatasetCV	GGGGGAAAGATGTCGAGAATCAAAGCGAAAAGAACGCGGAA
AT3G13460.3	1763	0	DatasetCV	TGTCCCATCTTTCTGTTTTTCTCGGTGTCAATGCAAGTGGA
AT2G19110.1	1528	0	DatasetCV	TTTCCAGGTGAAGGAATCTACGGGAAGATTGATGGTAACGA
AT1G62380.1	882	0	DatasetCV	AGTATAAGAGTGTGCTGCACCGTGTGGTGACTCAACAAGAA
AT4G37180.1	375	0	DatasetCV	ATGGCATCTAATGGGAAATTCGATGATGTTGAAAGGGCAAA
AT5G12310.1	1087	0	DatasetCV	GCAGCTGCAAAGCATGAGGCCCTTTTGGTTAGGTTGGGAAG
AT4G30600.1	473	0	DatasetCV	GATTGAAGCTGAAGCTCGTGCTGAGGAATTGAGGAAGACTA
AT5G25280.1	554	0	DatasetCV	TCCACATGGTCAAGGTACAGCTTCGTATACAACGAATGGAT
AT3G61198.1	81	0	DatasetCV	CCCTGGTTGATGAACCATGGCCGTGCGATCAGAGCGTGATT
AT4G13930.1	814	0	DatasetCV	GTTGTGACAACCACAACCCACAAGAGTTTGAGGGGTCCAAG
AT4G11420.1	2913	0	DatasetCV	TCCAACCGTGGGCCGCCTCCCGGAGATGACCACTGGGGAAG
AT5G43780.1	487	0	DatasetCV	ATCGTCCTCGCTATCGACGACGATCAGAAGTTTCGTATCGG
AT5G41990.1	1526	0	DatasetCV	TGAGAGGAGCGATGATGTCACAGCGTCTATGGTTCTCCGTA
AT2G39310.1	964	0	DatasetCV	ACCTGTTCCTACTCCTACTCCCTTGATTCCATCTAAGAAAC
AT4G38800.1	224	0	DatasetCV	CTTCGACCGATCTCCTCAGTCGTCTTCGTCATCGCTATGCA
AT1G69510.1	371	0	DatasetCV	AAGCTCTCCGCCCAAAACTGCAGCCAACCCCGCAACAGCAA
AT3G24503.1	1484	0	DatasetCV	TGTCGTGAAAGTGGCATGGACGCTCTCGACAACTATCTACA
AT1G20840.1	1834	0	DatasetCV	TAACAACATTACTCATGCTCCCAGCCATTGTCGTTGCCATG
AT2G38800.1	443	0	DatasetCV	TTCACAGAGAGCTACTTGTTCTTCAACTCTAAAAGATTCCA
AT1G51200.1	216	0	DatasetCV	GGTCCCAAGCTATGTACTAACAACTGCGGTTTCTTTGGAAG
AT3G61430.1	308	0	DatasetCV	ACCAGCTCCGTTTTTCGAACCTGGTGAGCTTTCTTCATGGT
AT3G56800.1	451	0	DatasetCV	GTTTTCGACAAGGACCAGAACGGTTTCATCTCAGCAGCTGA
AT1G31770.1	549	0	DatasetCV	AACGGTCAGCCTTTCTCTGGCTGCATCAAGCGCAGAACAGG
AT2G05710.1	1411	0	DatasetCV	GTGCAACCATGGGCTTCTTCCCTGTGGATCATGTTACTCTA
AT2G07731.1	319	0	DatasetCV	GCGACACTTCAGGTTTACTTCTTTTGTTAGGTCTCGACTTC
AT5G44790.1	2982	0	DatasetCV	ATCCGATTAAATTACGTCTTCGCAATGGCGTACAATGTAGT
AT2G36830.1	803	0	DatasetCV	AACACCACACACGAGCAGCTCCCAACCACAGACTACTGAAT
AT3G07090.1	729	0	DatasetCV	TCAGCTAGTAAAGAGAAGGTCAAGGACGACCCGTTGGGTGA
AT1G78850.1	1120	0	DatasetCV	TGCGATCCCAAGACATTTCACTACTTCAAGATCGAAGGAGC
AT3G09440.1	1972	0	DatasetCV	TGAAGCTGGTGGTCCAGCTGCAGGAGGAATGGACGAGGATG
AT2G31390.1	822	0	DatasetCV	AAGGGCTGTCGGTATTACACCAAGACTTTCAAAGGAGCCGT
AT3G54040.1	510	0	DatasetCV	ATTCTTGATCTCTATTTCAACCTCGCCGCCGGTGAAGGTGC
AT5G07350.1	692	0	DatasetCV	GCTGGCTTTGATGCCATGGGCCTTTTAGCTGCAAACAAGGG
AT3G60300.1	681	0	DatasetCV	GTGTGCCGCAAAATTTTTCACTCGAGTGACATTGAACATGT
AT2G30110.1	3245	0	DatasetCV	CAAGAAGGTTGTGGATCTCGCTCGGGATGTTGCGAAAGTCG
AT1G51510.1	222	0	DatasetCV	GGGACATCCGAGGCTTAAGTCGGCTATTGCCGGAGCTAATG
AT1G09140.1	874	0	DatasetCV	CTCGCTATACAGCTCTGTCTCAAGGTCCCAATCAAGATCAA
AT1G02920.1	360	0	DatasetCV	AAGGACATTGCGGGCATAGCCATGGGCATTGAAATTGAATC
AT3G55440.1	692	0	DatasetCV	AGGAAATGGCTGGCCAAGAACGTGAGTGCTGATGTCGCTGC
AT5G66760.1	739	0	DatasetCV	ACACAGTTCTTTGTTGAATACTTCGCCTTGGATCTGCTCAT
AT1G09140.1	971	0	DatasetCV	AAATGAAAACTGGCCACTGGCTGTACCCGAATCGTCTCAAG
AT4G23400.1	346	0	DatasetCV	TGGGCTTTTGGTGGCATGATCTTTGCTCTTGTTTACTGTAC
AT4G39200.1	409	0	DatasetCV	AGGTGTGATCAGGATGGTCGCTGCTCACTCGAGCCAGCAGA
AT5G15200.1	447	0	DatasetCV	CTGGTATGGCTAAGTCTATCCATCACTCTCGTGTCCTCATC
AT3G22380.1	4826	0	DatasetCV	AGGTGGTGGTATGGGTAAAACTCAACAACATCAGCTTGGGC
AT5G03630.1	184	0	DatasetCV	GGTGAACTTGCTATCATTTCCAGGGAACAAGTTCCTCCATA
AT2G13560.1	958	0	DatasetCV	GGCAGTGTATACTCGGTGGCCACATGTTATTGTGCAGTTTG
AT3G05590.1	107	0	DatasetCV	TAAGAAGACCAAAAGGACAGCTCCAAAGTCTGATGATGTCT
AT1G65270.1	856	0	DatasetCV	AGGGAGAAGTTGAACCACCACCAGAGAGATCATTTTGGGCG
AT5G65950.1	3219	0	DatasetCV	CAAGCTCTGCAAATCTTGCGCCAGGGGAAGAGTTCAAAAAG
AT4G09320.1	452	0	DatasetCV	TAGTGACTCTGTCGAGAGTGCAAGAAAGGAGATTGCTTTGT
AT4G14010.1	96	0	DatasetCV	TCTACTAGCACACGTCACCTCCAAGGCATCATCATCATCTC
AT1G57720.1	188	0	DatasetCV	ATGCACACATACAAGGGAAACAAAGGTGCCAATAAGGCACT
AT5G42950.1	1519	0	DatasetCV	GCAATAATATGATGTTGCCGCAGTCGAAAGGTGAATCAAGA
AT3G22890.1	501	0	DatasetCV	GACGACGGCTCCGTCGTTAACATGTCCGTGCCTATTGTTCT
AT5G05270.1	646	0	DatasetCV	AAAGATGGCATTTGCGAGATCGGGTTTGAGACGGAAGGTAA
AT1G48300.1	135	0	DatasetCV	GTATAGGGTTTGGTCTTGATCCTGAAGCTGGTTTGGTTGGT
AT1G15690.1	373	0	DatasetCV	TAAGTGCGCTGAGATTCAGACTGCTATTTCCGAAGGTGCAA
AT4G11420.1	2803	0	DatasetCV	CAGCAGCAGCAGCAGGAGCACCAGCAGCACCTTATGTTCCG
AT3G01420.1	1967	0	DatasetCV	GAACTCTGAAAGTGCATTTTCAGTATGGGATTCACCTCCAC
AT2G21870.1	1031	0	DatasetCV	CTTAGACACAAACGTTGTTTCATGTTTTTTTGATAATGGTG
AT3G56825.1	839	0	DatasetCV	ATTAATCAAACTCTATAAAACAAAATTAATTAATTAACACC
AT5G08560.1	1306	0	DatasetCV	TGATGATCGTCAAGTTCTTACATGTGGAGCAGAAGAGGTTA
AT4G13580.1	322	0	DatasetCV	CAACGCAAATGGGGCAATGCCAACGGTTAACGGTATCAACG
AT3G01540.1	1800	0	DatasetCV	CAAACCAGCGAGTTCCTCCTCAGATCCGCGAAATGGCTACA
AT1G55020.1	2449	0	DatasetCV	GCGACGAGGTCTATTTGGGACAGAGAGATTCTAAAGAATGG
AT2G19760.1	187	0	DatasetCV	GCCGCAATTCTCGGCCAAGACGGCAGTGTCTGGGCTCAGAG
AT2G47000.1	1732	0	DatasetCV	GAACATGGTACTCAGCTTTCCGGTGGACAAAAACAGAGAAT
AT3G11130.1	4818	0	DatasetCV	TGAAATGAGACGTGTGGCTGCTTATATCTATAAGAAAGCTG
AT1G12110.1	1176	0	DatasetCV	ATCCTCTTCTGGACCGTCCACGCTCAATTAACGACATTATC
AT4G24620.1	1101	0	DatasetCV	CGGCAAGAATTGAAGGTTGGCTAGCTAGATTTCCTATGTAC
AT1G56340.1	581	0	DatasetCV	CGTCCTCCGTCCAGATGCTACTTACAGTATTTTGATTGATA
AT5G19510.1	725	0	DatasetCV	CCTCATTGAAGACTTCCTCACCTCAGAGCCTAACAACGAGT
AT3G16400.1	812	0	DatasetCV	AAAAAGGAGAAGGTCCAGGGCTAAGATGCTCACATGGCATA
AT1G27770.1	2346	0	DatasetCV	TTGCAGGTGATGGCACGATCCTCGCCCATGGATAAGCATAC
AT3G13300.1	1764	0	DatasetCV	CCTATCAGAGTTTACAGTCACTATGCCCATATTGAGTTTCA
AT3G09440.1	2102	0	DatasetCV	GTTTGTATTTCAACATTTTCCTGTTTTGTCCCCTAGTTTTT
AT1G11650.1	986	0	DatasetCV	GCCAATATGGTGAGATTGTGCATGTGAAAATACCCGCTGGA
AT3G22890.1	311	0	DatasetCV	AGAGCTCATCGTGGAAGAGCCAAAGCGGCGAGAGAAGAAAC
AT1G70410.1	270	0	DatasetCV	CGCGAAGATCAAAGCGTTGACGGCGGAGCTAAAGGAGCTTG
AT4G29010.1	1691	0	DatasetCV	GTTGACTTGTTCAGAATTGACAGCGTTATTACCTCTTTCGG
AT3G60245.1	396	0	DatasetCV	CAATTTAAGTTTTGCAAACTCTATGCTTGTGATTTTGAATC
AT5G53300.1	345	0	DatasetCV	TTCAAGCCTCCTAAGGTGGCCTTTAGGACCAAGGTGTTCCA
AT5G01750.2	881	0	DatasetCV	GCCTTCATCGCCTCTCTCGTCGTCATTCTCGATGACGTCAA
AT2G07709.1	375	0	DatasetCV	AGGTGGCCTCGTTATCCACACCTCCGGTCGGATGAATGGAG
AT5G03380.1	137	0	DatasetCV	TGAGAAAAAGGAAGAAACGGCGACGAAACCTCAAGGAGAGA
AT1G56340.1	237	0	DatasetCV	GATGCTAACGATAAAGGTATCCAAACTAGCGAGGACTACAG
AT5G44380.1	938	0	DatasetCV	AAGTGGCAACAAATTTCATCCAAGATTATTGAAGAGATACA
AT1G31770.1	482	0	DatasetCV	CAAAACCACTCTTCTATCAGCTCTCGGGGGCCGTCTCTCCA
AT1G15690.1	566	0	DatasetCV	GCTACTGCAGCTTTCAGTACCATTGCTTTCGTGCTTGGTGC
AT2G30490.1	1128	0	DatasetCV	GGACCGGGTGTGCAAGTCACCGAGCCTGATCTTCACAAACT
AT5G54500.1	324	0	DatasetCV	GGCACTCTCTAAGATGAGCGCACCACCAAAGAGTGAATCCC
AT1G35720.1	451	0	DatasetCV	AGTTGCTTGCACAAGGACATCAACGCAGCTGCTTCACGCTA
AT4G10840.1	1631	0	DatasetCV	GAACAAGAACGTGGACCGTGCGATCAGGACACTCTCGGTGT
AT1G22070.1	844	0	DatasetCV	ACACACACTGGCTAGAAGAGCAAAACAGGAGAGTTAGTGAG
AT5G03545.1	624	0	DatasetCV	TTGTTATCCCGTGTGATGCACCATTCAGGTGTGTTCCTATG
AT5G14120.1	1876	0	DatasetCV	GGCTGGATCCCTCGTGTTCTCGGGTATGATCGCGAGTAGCA
AT2G27530.1	623	0	DatasetCV	TGGGTGTTGCTGTTGGTAACCTTTCCATGGAAGAGAAGCAG
AT3G15730.1	1541	0	DatasetCV	GAGGAGCTGCTGCTGGGTTTCCCGAGTCGCCTGAAGCTGCT
AT3G55440.1	779	0	DatasetCV	AAGGAGCTAGGTGGACAGGCCGATGTTGATGGTTTCTTGGT
AT5G44790.1	2951	0	DatasetCV	CATCGATCTCTCTCGAAAAACCTTAACACGAATCCGATTAA
AT4G27090.1	568	0	DatasetCV	ATCAGTATGTGCTCAATTATCAGACATTATTCAAGTTTGAA
AT2G15620.1	312	0	DatasetCV	GGTTAAGATCGAGAGAGAGCCCATGAAGTTGTTTATGGAGA
AT1G70770.1	1215	0	DatasetCV	GAGCTGTTAGGAAGGGAGAGCGTTTGATTCCACCTCCTTCA
AT2G24360.1	748	0	DatasetCV	ATTGATCTGAGGAAACTCAACATGGGTCCTGCCTTTGCTCA
AT1G55020.1	2486	0	DatasetCV	ATGGGCGGCTGAGAAAGAAGCGTTGGAGGCGTTCGAGAAGT
AT1G54100.1	1446	0	DatasetCV	TCGGTTCCTCAAGGTCTAAGCAGCTCGATATTCACTCGGAA
AT1G50920.1	1869	0	DatasetCV	CGTTGATGATGAGCAACAGTCGAACAAGAAGCAGCGTGTGA
AT4G23100.1	1792	0	DatasetCV	GAACAAAAGGTGTCTATAAACCTTTGGGTGTGAGTTTATGC
AT1G35720.1	525	0	DatasetCV	TTGAAGAGGACGTTGCTCACCACACTACCGGTGACTTCAGA
AT1G66580.1	522	0	DatasetCV	TAGAGCTAAGTTTAAGTTCCCTGGTCGTCAAAAGATCATTG
AT4G37070.1	103	0	DatasetCV	AACCGCCATCGTGCGGATCACTCGTAACCATCCTCAGCCTT
AT4G34200.1	1173	0	DatasetCV	TGGAGAGCTTGCTGCTACTGCAGTCAATGCACCTATGGTTT
AT1G09430.1	1349	0	DatasetCV	TCCCTCTAGAGGTATATGGTCCAGAGGCAACAATGACGGGA
AT4G23630.1	1537	0	DatasetCV	CTTTCGGTTATGTGAATGAACTTGGAATTTTCCTGACTGGT
AT1G54000.1	1126	0	DatasetCV	TCCGTGAGCTTACTGTTTACCCAGTCGATGAACCCATGCGT
AT3G01420.1	2005	0	DatasetCV	CACTTACCAAAAATCCAATCCCTCTCTATCTCCGAATTCCC
AT1G10940.1	597	0	DatasetCV	CATCCGAATATAATCCGGTTCAAGGAGGTGGTGTTGACTCC
AT3G03780.1	737	0	DatasetCV	ATCTCGAGGGTCACAAACTCCAGGCTTTTAGCGGTGCCTAT
AT5G20250.1	2430	0	DatasetCV	TGATGGTGTATCTTTTGCCCCAATTGGTCTAGTAAACATGT
AT1G08110.1	643	0	DatasetCV	AAGACTATCGGAACTACTACCGTAAACGCAGCTTGATCTCA
AT5G58420.1	705	0	DatasetCV	CGTGAGAAGCATAAGGGAAGCTTTGAGACAATCCACATCCA
AT2G01010.1	631	0	DatasetCV	GTTGTTGCAGTTAAAAAGCTCGTAGTTGAACCTTGGGATGG
AT1G10670.1	1415	0	DatasetCV	TCCCCATCGAGGTCTATGGCCCAGAAGCAACCATGACAGGT
AT3G08650.1	2031	0	DatasetCV	ACTTTCACGAGACTTGTGTGCTTGCACACACCCTACTGCAA
AT1G51760.1	781	0	DatasetCV	GAGAGAGGGTCCTATGTTGGCTGGTAGTGGCTTTTTCAAAG
AT5G40370.1	463	0	DatasetCV	TGGAGCGATCGCAGGAAAGACTGCAACAACTTCTGCTTAAG
AT2G13560.1	1116	0	DatasetCV	CAGTTAGAGCACAGGGGCGACCTATGATTGATTTCCCAAAG
AT3G63460.1	3072	0	DatasetCV	AACTGTTCAGACTGCAGATACTTCCAACGTTCCAGCCCACC
AT1G53210.1	1481	0	DatasetCV	CTGCTACTGTTAGGAGCTGCCATTGCAGCTGCATTTGCTGA
AT1G32450.1	523	0	DatasetCV	ATCTTCCAAGTCATTTTTGTCATTGGACTTTCATCGCTATC
AT3G45010.1	370	0	DatasetCV	TTACTACAAACTCCCTAACTCAAAAGCAGCAAGGATGTTCT
AT1G04820.1	237	0	DatasetCV	GATGGCCAGATGCCGAGTGACAAGACTGTTGGTGGAGGTGA
AT5G45500.1	2099	0	DatasetCV	TAAGGAGAAAGATCCCACAGCGCCAGAGCTTCCAAAGACAT
AT5G36290.1	925	0	DatasetCV	CAGTTGTTGGAGGAAGCATGCTGGCTTCAAGGATCTCGCAA
AT1G01620.1	393	0	DatasetCV	GCCTCTGTTGGAATCCAAGGCATTGCTTGGGCTTTCGGTGG
AT3G24503.1	886	0	DatasetCV	ACTTCTCATATTCAACGACGCTGATATTGACAAAGCCGCCG
AT4G35830.1	2474	0	DatasetCV	AAGTTCTCGTGATTGGGCTGCCAAGGGTCCAATGCTTCTGG
AT5G59880.1	381	0	DatasetCV	CGATTTTGATTTTGTCAGTTCTGAGGGTGTCCCAAGGAGCA
AT5G37600.1	980	0	DatasetCV	GAAGAAGGCGGTTACGAGATCATCAAGAAAGCAATCGATAA
AT5G35200.1	705	0	DatasetCV	TGTTTCCGTGTTTTGAAGTACGATGTTGAGGTTGACCCCCC
AT2G45620.1	1170	0	DatasetCV	GAGGGAAGGCAATGCAAACTCTGACGAGATTGAGGATTTTG
AT5G56030.1	2029	0	DatasetCV	GTGAAGGACCTTGTGCTTCTCCTCTTTGAGACCGCTCTTCT
AT2G44790.1	163	0	DatasetCV	CATTGTCCCGGGCGCAGTAGCTGTGACTTACACTATTGAAT
AT1G11910.1	1121	0	DatasetCV	GGATTTACTTTTGTCTGAGACCCAACCGAAGAAAATCTGCT
AT3G16440.1	485	0	DatasetCV	CTGGCGAAATTCTATATGCTCTTGGAGCGTATTTTACTACA
AT1G59900.1	1004	0	DatasetCV	ATGAGATATCTGGTGTGAGGCAGGAACGGGATCCAATTGAG
AT2G13360.1	1229	0	DatasetCV	TAGGAAATGTGAATGAGTTGCAACTTCTCGGGTGTCTTGCG
AT1G76180.1	471	0	DatasetCV	CGACAGTTCTTCTAGCTCCTCAAGTGAGGAAGAAGGTTCAG
AT1G11650.1	823	0	DatasetCV	AGAATTGGTCCCGCTGCTAGCAAGAAAGGTGTAACTGGTCA
AT5G04870.1	721	0	DatasetCV	AACTGAAAGCAAGCCTGAAACGCTAGAGGAGATAAGCCTTG
AT3G09630.1	97	0	DatasetCV	GCCGCCGCTGCTCGTCCTCTCGTCACCATCCAAACCTTGGA
AT3G16460.1	418	0	DatasetCV	ATTTCTGCTCCGGAAGCCACCGGTAAACAGATCTCCGGTTT
AT5G65050.1	805	0	DatasetCV	ATAAAAAGCTTCATAATAATCTCAACCTTTTTATCTTCCTC
AT5G19760.1	984	0	DatasetCV	GTTTACTGTGTCAGGATTGCCCCTCACGTCATGATGACATG
AT4G26970.1	1971	0	DatasetCV	GAAATTGTCGGCTACGGCTGCACAACATGCATTGGGAATTC
AT5G13420.1	1399	0	DatasetCV	CAAGACAAGGCCAACACTCTCAAACTAGCCAGCCATTGAGG
AT5G47030.1	625	0	DatasetCV	GAAACTTGCTTCTGCCACAACAGATCTTGAGAAAGCAGAGG
AT1G07890.1	763	0	DatasetCV	CACAAGGATAGGTCTGGCTTCGAAGGTGCATGGACATCAAA
AT4G17140.1	11374	0	DatasetCV	CTAAACAGGTTTGGTCGAGGCGGATCACCGGTGTAGGTGAT
AT5G53460.1	3680	0	DatasetCV	CAATGACCTTCGTGGCCGTACTGTTCTTCAGACAGATGGCC
AT5G44380.1	1009	0	DatasetCV	TGATGGAAACAAGACTGTGACAATGACCTACCTAGGTCAGT
AT2G01450.1	961	0	DatasetCV	GTTACTTCAGCGTTTGATCGCTTTTGACCCAAAGGACCGTC
AT3G12120.1	1139	0	DatasetCV	CACGTGGCTCATCACCTGTTCTCGACAATGCCGCATTATAA
AT1G30580.1	1019	0	DatasetCV	ATACTTCTTTACAGCAGGGCCTGATGAGGTGAAGTGCTGGC
AT2G37410.1	649	0	DatasetCV	TGCAGGGAATGCCTGGGATGCCCGGAATGCAAGGAATGCCT
AT5G02870.1	504	0	DatasetCV	GTCACAAGATCGAGAATGTTCCTGAGATGCCTCTTGTTGTT
AT2G37130.1	728	0	DatasetCV	ACCCAACGATTGACCCTACTCTCGACCCAAGTTACGCCCTT
AT1G73330.1	570	0	DatasetCV	TGCATGAACGTTGGCATATTCACCGATATCTCTGGTGCACG
AT3G11510.1	469	0	DatasetCV	TGGTCGTATTGAGGATGTGACTCCGATTCCCACAGACAGTA
AT4G37410.1	1154	0	DatasetCV	CCGAGACACTCCGGCTACATCCAGCAGCGCCGGTTCTTGTG
AT2G14720.1	1688	0	DatasetCV	GCGTTCTCTGCTTGTGTGGACAAGGACAGTGTGAAATGCGA
AT5G15200.2	336	0	DatasetCV	GGATGAACCGTTACGGGCTTCTTGATGAGAGCCAGAACAAG
AT3G09440.1	1996	0	DatasetCV	AGGAATGGACGAGGATGTTCCTCCTTCTGCCGGAGGTGCAG
AT4G23400.1	73	0	DatasetCV	GAAGGCAAAGAAGAAGACGTCAATGTTGGAGCCAACAAGTT
AT3G58560.1	702	0	DatasetCV	CCGTTTGAATAGCTCAGGGTCTGGATCTGGTGTTCTCAGCA
AT5G60360.1	830	0	DatasetCV	TGGCCTCGACACAGAGAAAGCTTATCCTTATACCGGTAAAG
AT4G20110.1	1168	0	DatasetCV	TGCGAATGAGAGTAGCAGGCCTTGGGTTTGGTGGGATTATG
AT1G66270.1	413	0	DatasetCV	CATGGTCAAGAATATTTCCTCATGGGAGAAAGGAGAAGGGA
AT5G64100.1	970	0	DatasetCV	TTGAGGTTCGGAACCGAGTTCGGGAAGTCGATGGTCAAAAT
AT5G42500.1	539	0	DatasetCV	AAGGTTGTTGGTCTAGATGCCGTGGTCGAGTATAATGTCTT
AT4G24690.1	478	0	DatasetCV	AGAGAGTAGTGGGAGTTCCACACCTGCGGGTATGCCTAACC
AT2G36120.1	961	0	DatasetCV	GTTTTTAAATTGTACCACGACCAATATTGTTGTAAGCTACT
AT2G41900.1	714	0	DatasetCV	GACCACTGCGTTACACTGCGCTGCTTCTGGAGGAGCTGTGA
AT5G54075.1	180	0	DatasetCV	CTCAAGAGACAGGCCCTTAACCCTGGTTGATGAACCATGAC
AT4G40060.1	1400	0	DatasetCV	GCTTTCACAGAAATAGGAATCAATGGGGACACTCTGATATG
AT4G11260.1	1143	0	DatasetCV	GGGACGGTACTGTCGACAAACTGGAAAGAAGTTGGGACTAA
AT5G08680.1	1553	0	DatasetCV	TCCAGAGATTCTTGAGTCAGCCATTCCATGTTGCTGAAATC
AT2G17360.1	598	0	DatasetCV	ATCAAGCCTAACGACACCATCAAGCTCGACCTTGAGGAGAA
AT3G15730.1	950	0	DatasetCV	ACAGAACTTCTGTTGATGTGCTGAAGAAAGATGGGCTCATG
AT4G30190.1	1822	0	DatasetCV	GAAAAGGCTGATGGATTTGCCGGAGTCTTCCCAGAGCACAA
AT3G01420.1	2000	0	DatasetCV	ACCTCCACTTACCAAAAATCCAATCCCTCTCTATCTCCGAA
AT2G07709.1	3750	0	DatasetCV	AAGTGAAGTGGTGGGCCTACCCATCCCAACCAGGGGTATGC
AT3G56825.1	635	0	DatasetCV	GCTAAGATCAAGTGTAGTATCTGTTCTTATCAGTTTAATAT
AT3G02080.1	351	0	DatasetCV	GTTGGTGCTTTCCGTAGAATCTATGGTGGAAGCAAGAGGAA
AT3G04730.1	471	0	DatasetCV	AAAACCGACCACCGGAGATGCCACCGAAGGAAACGATAAGA
AT5G48930.1	1023	0	DatasetCV	AGGGGATTTGTTATCTAAGCCAACATGGTATGCTGCAGGAC
AT1G59870.1	3371	0	DatasetCV	GACACTGGAAGAACCGTGGTCTGCACCATTCATCAGCCTAG
AT3G63200.1	496	0	DatasetCV	GGAGGCATTCTCGCCGCCCTCCTTGTCGCCGACGACGGCTC
AT3G50740.1	1220	0	DatasetCV	AGAGCGTCGTTGGTGGCGTTCCGATGATCGCGTGGCCACTT
AT5G13180.1	542	0	DatasetCV	AACTGGGTACTCTGTCGTATCTTCTTGAAGAAAAGAGCCGG
AT1G77750.1	653	0	DatasetCV	GTCATTGCCATTGCCATTGCCATTGCAGAGGAAGAAGAATG
AT5G03380.1	373	0	DatasetCV	AAATTAAGAGACCAGTCGAACTTGTCTCTACAGTAGCGCCG
AT1G09760.1	760	0	DatasetCV	AATTGCCAGACTCGAACAGGCTTTGAAGTTTGGACAGGTTC
AT5G63400.1	714	0	DatasetCV	AAGTCGAGGCTTGCAGCTTTCCACAGTCAAACTCAACCGGT
AT3G05840.1	433	0	DatasetCV	GGCAATGTGACTGAGACTGGCCATATAATAGTAACTACTAT
AT3G53420.1	348	0	DatasetCV	AGCTCCGTTTATTGATGGAGCGGAGCTAAAGAAGTGGTCTT
AT1G02780.1	681	0	DatasetCV	CACCTGCTGCTACACCTGCTCCAACTGCAGCTGTACCGAAG
AT5G36880.1	1952	0	DatasetCV	GAATCTGCTCTGGTTTTACACCCTCAATGTGCAGAAGCAGC
AT4G15610.1	697	0	DatasetCV	TTGAGTCACTCTCTTTGTTTCGTTGTTTCTCTCAAGGTAAT
AT1G14320.1	716	0	DatasetCV	GCCTTTTTGCCAGCCCACTACTGAAGAGTATCAGAACTGAA
AT5G62700.1	1363	0	DatasetCV	CAACATGAACGATCTTGTGTCAGAGTACCAGCAATACCAAG
AT4G30210.1	2140	0	DatasetCV	TTATATGTTTGTGGTGACGCCAAAGGCATGGCAAGAGATGT
AT3G44310.1	156	0	DatasetCV	CACCGTCTATAACGATACTCCTGCCACTATAGACAAAGCGG
AT5G53300.1	606	0	DatasetCV	TAAATGGAAAATCCCACCTACTAAATTATCTCTTTATGAAG
AT2G07709.1	2100	0	DatasetCV	TTGAATAGCATGGCCTGGGGCTAAAGTAACTCAAGTGGGAG
AT3G59540.1	78	0	DatasetCV	GTGGAAGAAAGTTGCAGCCACTAAATCAGATCCGACAATGC
AT4G37410.1	969	0	DatasetCV	GCTGGGTATAATGGTTGCCTCATCAGAGACCTCCGCTTTGA
AT4G30600.1	567	0	DatasetCV	CCTGGACTTGAAGGAGGAAACAAAAGGGTTAGTAGTGAAGG
AT3G44310.1	470	0	DatasetCV	TTTTCTTTAGTCCACAGGGTCAGTTCTTGGGCAAGCACCGT
AT5G56000.1	400	0	DatasetCV	AGGTCTGGTACCAAGGAGTTCATGGAGGCATTGGCTGCTGG
AT3G13300.1	1644	0	DatasetCV	TAACCAAGTCATAGCATTATCTGAAGCAGGCTTGCTTTTAC
AT5G07350.1	1399	0	DatasetCV	AGAGAGACGGGTCTGTCTTTCGAGTATCAGATCTCCAAAAA
AT3G01540.1	1916	0	DatasetCV	GGTTATGGTGGCAGAGGTAGCTTTGCTTCCCGTGACAGAAG
AT5G53460.1	2322	0	DatasetCV	GCTGTTGGTGCCGTTCATCACCACCTGGTTAAGACACTTGC
AT4G38470.1	821	0	DatasetCV	AGGTGCCAGAACGCATGTTCCAATACCCAATGACGGAACTG
AT2G36880.1	1140	0	DatasetCV	GACACCTACAAGACCGGGACCATCCCAGACAAGGATATCCT
AT2G33040.1	910	0	DatasetCV	AATCTGGCCGAGTTCCAATTCTCTTGTGTGATGTTCAATGC
AT5G57940.1	1903	0	DatasetCV	TTGTTCACAGAGAGTACCTACTTAGTGCGGGAAGGAGATCC
AT3G54620.1	286	0	DatasetCV	ACACAATCGAGAGATCACCTCCACCGGTTCAGTCTCTTTCG
AT4G16190.1	250	0	DatasetCV	ACGAGAAGACTTACGCGACTCAGGTAGAGCACGATCATCGG
AT1G54000.1	1212	0	DatasetCV	TCTAGCTCGTCCACTAGCCGCGGTTACGAGTATTACTGAGT
AT1G57720.1	1405	0	DatasetCV	ATGCTTTAAGTGAAAAGGCTCTTTGTATCTCCGTAGAGGTT
AT3G09270.1	622	0	DatasetCV	CCGCGGAGGAGTTTCCAAAACTTCAACGTTGGTCGGAAGAT
AT5G35200.1	722	0	DatasetCV	GTACGATGTTGAGGTTGACCCCCCAAGAACCAAAGATTTGG
AT4G38630.1	1095	0	DatasetCV	AACCTCTTGGGAAATCAAGCCTTCATATCGTCTGTTCTCTC
AT4G21960.1	861	0	DatasetCV	TGTCCTGACTCGATCCCTGACCCAAAGGCGGTCCAGTACGT
AT5G64740.1	2637	0	DatasetCV	TCTAACGTAGAACAGTCAACCGAGGCAATGCAAATGAAGTT
AT5G14040.1	1174	0	DatasetCV	TCAAAGTGTTTGTTGGCCTGCCAACCACTGGTGGTGTTGCT
AT4G29700.1	1127	0	DatasetCV	CCACCGATCATAGGAATTGTCGGAGAAGGTCTAATGGTCAG
AT2G37270.1	667	0	DatasetCV	GCTGCAAAGGGATCTTCCAACAGCTATGCCATCAAGAAGAA
AT5G54900.1	147	0	DatasetCV	AGATGCAGTTGTCTGCGGCGCCACTAGGTCAACATCAGTAC
AT5G44790.1	3168	0	DatasetCV	ACCACTGTTTTGAAAATCACCACGGAGTAAAAAGTCCTTTG
AT2G07723.1	1654	0	DatasetCV	ACTTCCCCCGGTCTTCGGCCCGAGCTGTATGAGGCAGAAAC
AT5G01500.1	458	0	DatasetCV	GGAGCGTTCGCCGGAGCCGCCGCAAAGTCAGTGACGGCACC
AT5G04740.1	820	0	DatasetCV	AGAGATGATCAAAGTGATGGCTGATGTCAACATAGACGTGG
AT1G30510.1	577	0	DatasetCV	CTTGTCATATCGTCATCGATCATGATGGTAACCTTCCTTAC
AT3G22380.1	4840	0	DatasetCV	GTAAAACTCAACAACATCAGCTTGGGCCTCCAGGGTTCACT
AT5G44020.1	645	0	DatasetCV	ATTGAAGCCGGTTACCACAGCTGGTCTAACCTCCTTCTGAG
AT1G49240.1	1265	0	DatasetCV	TATCCTTGCTTCCCTCAGCACTTTCCAGCAGATGTGGATCT
AT1G54630.1	255	0	DatasetCV	CTTTTAATCTTCGCCAGCTTCCTACCCGCTTGACTGTTTAC
AT4G39090.1	675	0	DatasetCV	GCTTTGGAAGGTGCTAACTTCCTCGCTACCGGCAAACTCGT
AT2G07719.1	535	0	DatasetCV	GCTGAGCCCGAATAAAATGACAGTGGGCTCCCAGATTACTT
AT3G13310.1	491	0	DatasetCV	CGCGACACTTGCGGATCCGACTACAAGAGCGATTTACGACT
AT5G64120.1	598	0	DatasetCV	CGTTCAACAACAGAAATTCTCCGCCTTGGGACTCAATACTC
AT3G09630.1	1014	0	DatasetCV	GAATCCGATCAAGAAGGATGCGAAGAGGGCTGTTCTTAAGA
AT5G58060.1	496	0	DatasetCV	CAAAAGAAGACTCCAATCAGCCTTGGCCATACTTAACCGAA
AT5G42020.1	661	0	DatasetCV	ATGAAGGAGACAGCCGAAGCCTACCTTGGAAAGAAAATCAA
AT4G38630.1	1120	0	DatasetCV	TATCGTCTGTTCTCTCATCGCTTCCTGGGGTGGATCCAAAT
AT5G44790.1	1676	0	DatasetCV	GGTGACTGGTGAATCAGTTCCTGTATCAAAAGAGGTTGATT
AT5G23540.1	789	0	DatasetCV	GAAATGGACAGATGGTCTGACGCTAAGACGCTTTGACACCC
AT3G56310.1	886	0	DatasetCV	TTTGAATAACAAGTGGGCTGCATATGCTGGACCTGGTGGTT
AT5G28020.1	1198	0	DatasetCV	CTCTGGAGCCGCAGCAGCGGCTGCGTTAAAGGTTGCAAAGC
AT3G24160.1	780	0	DatasetCV	GCGTTTATGACGATTTATCTCATGGTATTGACAGAACTGCC
AT2G35750.1	318	0	DatasetCV	CTTTTACCGTTTGGGACCGGCCATGAGATCTATATTCCCCT
AT4G30190.1	2928	0	DatasetCV	ACTCAAGGGACATGTGGAATCAGTCGTGAAGCTAAAGGGCT
AT5G58860.1	1395	0	DatasetCV	AGATGGTTACAAGTTCGTAGCGTTCAACGCCGGACCAAGGA
AT2G27020.1	184	0	DatasetCV	TCTCCCGATGGCCGTGTTTTCCAGATCGAGTACGCCGCTAA
AT1G76200.1	146	0	DatasetCV	GGTATAACTTACAAGGGAGTCACTGTCCACACTCCCAAGAC
AT4G15390.1	435	0	DatasetCV	GCCACGTGGCCTTTGCTGCTCGTGAAGGCAACTTACTTCGG
AT2G33150.1	694	0	DatasetCV	ATGGCATGGGAAGGGTCAGTCAACCCAGCGGTGAAGAAGTT
AT5G09900.1	580	0	DatasetCV	GCAAGAAGTTGCTGTGGAGACATTTGGTGCTATGGCAAAAA
AT2G23930.1	273	0	DatasetCV	GGTAACGACAAAACCGACATCGGGATGGTGGTGATTAGAGG
AT5G05170.1	894	0	DatasetCV	AGTAGATATTGATGCCAGCACAGATATCCTAGCAGATGAGG
AT5G08670.1	544	0	DatasetCV	TTGGACGTATCATGAATGTTCTTGGAGAACCTATTGACGAA
AT3G15730.1	2035	0	DatasetCV	CCTGCTGAGAAACCAGACCCCGACACTGATTACATGAGGGC
AT3G15950.1	2309	0	DatasetCV	TGAGGAATTTGCGGTGGAGACGACAAAGAGAGCAGAACATA
AT1G62380.1	764	0	DatasetCV	GACGACAAGGTCAGTGGTCTCCAGCTTCTTAAAGATGGTGA
AT5G28020.1	845	0	DatasetCV	GCAAACCCCGAGATTCATTACCGAACCACGGGACCGGAAAT
AT5G07960.1	230	0	DatasetCV	GACTACTCCGGATTCATCGCCGTTATCCTCGGCGTCTCCGG
AT5G20020.1	500	0	DatasetCV	GAAGAACAGGCAAGTGAAGGCAAAGCAAGTCACATTCCACA
AT4G27320.1	1151	0	DatasetCV	TCCTCTGGATTATTTATTCCCAGTCCTTGTTCTTCTTATAA
AT1G56340.1	261	0	DatasetCV	ACTAGCGAGGACTACAGATTCTACGCTATATCAGCTGAATT
AT2G02130.1	192	0	DatasetCV	GAGTCAAAAAGCCATAGGTTCAAGGGTCCATGTGTGAGCAC
AT5G56010.1	2011	0	DatasetCV	CTGTGAAGGACCTTGTACTTCTTCTCTTTGAGACCGCTCTT
AT4G39260.1	550	0	DatasetCV	GGCGGTGGTGGCCGAGGATACGGTGGTGGTGGACGCCGTGA
AT1G36730.1	1148	0	DatasetCV	GACAGTGAAGAAGATGATGACGATGTCCAGTGGCAAACAGA
AT3G09630.1	166	0	DatasetCV	ACCGTCGTACTTCCCGACGTCATGACGGCGCCAGTTCGACC
AT3G02080.1	379	0	DatasetCV	GAAGCAAGAGGAACGGTAGTCGCCCACCTCACTTTTGCAAA
AT2G07709.1	303	0	DatasetCV	GGGCGGTTGAGCAACTCAAGCGAACCGCCCTACCTTACTAC
AT4G09750.1	642	0	DatasetCV	GTGGAATGTACACTTCGCCGCTTACTACAGATCTTCAGTTT
AT3G57765.1	690	0	DatasetCV	GCCCATGCGTTGCACTACTGCACGGGCCTGGCTCAACCCGC
AT5G05170.1	942	0	DatasetCV	GAATGACGAAGCGAGGCAGCCTCTGTCAAGGAAAGTTTCAA
AT2G14170.1	837	0	DatasetCV	GCAGTGACATGTGGTAATACCTTTATTCTGAAGCCATCAGA
AT1G33120.1	829	0	DatasetCV	GAGACAATTAGAGACCCATTCACTCTCACACTTTTGCCAAA
AT1G59870.1	2482	0	DatasetCV	GTACTGGATTTCAGTTGGAGCCTTGCTTTGTTTCACAGCCC
AT1G14870.1	435	0	DatasetCV	ACCGCGGTTACGATATGAGTCTTGGATGGGCGGGGAACGTG
AT1G23190.1	1441	0	DatasetCV	CGACTATGAGAATGTAGACGCAGGTAAAGCTAAGGAACTGA
AT4G21110.1	578	0	DatasetCV	AACATAGCTTTATTCGCTATCTCTGACTGTTTGTTACAATC
AT4G35310.1	1648	0	DatasetCV	AACTAGAGCGGGAAGAGCATCTTGTTGCAGCGTTTCAATAT
AT1G14670.1	1149	0	DatasetCV	TGGGTGAGGAACTTGTTACTCACTGGATGTCTCTTCTGTGG
AT5G05170.1	917	0	DatasetCV	ATATCCTAGCAGATGAGGCTCTGCTGAATGACGAAGCGAGG
AT5G12250.1	1431	0	DatasetCV	CAAGACGCAACTGCAGATGACGAAGGCGAGTATGAAGAAGA
AT2G47730.1	1431	0	DatasetCV	CATCCATTACTTGTTGGGTACTGACTCCAAGGTGCTCTTTG
AT5G45500.1	2069	0	DatasetCV	GATCTTGGAAAGGGCTGCAACCATGTTCCGTAAGGAGAAAG
AT4G27130.1	511	0	DatasetCV	CAGGTTATTCAGCTTCAAGGCGATCAGAGGAAGAACGTCTC
AT2G29750.1	1399	0	DatasetCV	GTGAAGGAGCTTGGTTTAGCCTTGGAGATGCGGTTGGATTA
AT1G53750.1	1106	0	DatasetCV	ACAGGCCTGACACACTAGACCCAGCTCTTTTACGTCCTGGA
AT5G60390.1	363	0	DatasetCV	GCCCCAGGACATCGTGATTTCATCAAGAACATGATTACTGG
AT2G36320.1	851	0	DatasetCV	TTGATTTCAAATCGGCGGGACGTGAAGAGATCGCGAAAGCT
AT3G13750.1	2202	0	DatasetCV	GTCAAATATGGATAAATGGGCAGAGCCTGGGACGTCACTGG
AT5G05270.1	475	0	DatasetCV	GAGATAAAAGGAGCTCAGTACGGAGTGCAGCTAGAGAATAC
AT4G35830.1	1842	0	DatasetCV	ATTGATTTTGAGACACAGCCCATTGGAACTGGGAAAGATGG
AT2G39310.1	1223	0	DatasetCV	GATGGCTACTACGATAAGATCTTCGGAGTTGAGGAACCAAT
AT3G49010.5	447	0	DatasetCV	TTGACAAGATACGCCTTGAGCGCACTAACAAGAGGCATGCC
AT2G05710.1	1458	0	DatasetCV	CTCAAATTGACTGGAAGAAGCGATGAGACAGTGGCTATGAT
AT5G08690.1	1150	0	DatasetCV	TCTGCAAGAGCGAATCACAACCACCAAGAAAGGGTCTATCA
AT5G37510.1	1298	0	DatasetCV	GTTAACAGAATGGGCTCAGACAATGTATGGTGTGAAGGAAC
AT1G74840.1	542	0	DatasetCV	GAAGTAATCTTAACCGTCGCCGCCGAAGATCTAGCCTTTTT
AT1G53210.1	1135	0	DatasetCV	GTCAGCGGCTGAACTAAAGGCGCTTATCATTGGGATCAGCT
AT4G34180.1	832	0	DatasetCV	GTGATTCAGTTCTTCTTCTTCTTCTTCTGTGTAAGTTGTTC
AT1G03220.1	624	0	DatasetCV	AGCTTCCACCGTAAATTCGCCGTCTGTCTAACTTCCGGTAA
AT4G11320.1	1111	0	DatasetCV	AAGATGGCTCGCAACATTGCCAATCCAAGAGGCCTATGTGG
AT5G48230.1	1287	0	DatasetCV	TCAGGAACCAGAGTTTTTCACTACTGCTCCTGCTCTTGCTA
AT4G21960.1	798	0	DatasetCV	CGTTTGTACCCTGAGGTGGACCCGTCCTTAAACCCGGACCA
AT2G38800.1	310	0	DatasetCV	TTTCTAGGAATCAGAAGAACCAAACCGGTTCAAAACATGAT
AT3G09630.1	1148	0	DatasetCV	TTAAGGCTAAGAAGGAGAAGCTCGCCAAGAAGAGGAAAACC
AT5G60360.1	1231	0	DatasetCV	CCGTTGTGGCTTGAGATGATCAGCGAATGTGGTTGGTCAAT
AT2G05440.1	266	0	DatasetCV	ACGGAGGAGGGGGCCACGGACTTGACGGATACGGAGGAGGT
AT2G38040.1	1515	0	DatasetCV	GCTCCTGAAACACAGGATGGCTAAGTACCGAAAGATTGGAG
AT4G39260.1	484	0	DatasetCV	GGCGGATACTCAGGAGGAGGCGGTGGTGGTTACGAGAGACG
AT5G16110.1	704	0	DatasetCV	CTCGTTTTCGAGATGAGAAACTCAATCCAATCTCACCAAAC
AT4G30170.1	460	0	DatasetCV	CATGTGCTGACATTTTGGCTCTCGCCACTCGTGAAGTCGTC
AT2G39770.1	836	0	DatasetCV	GACATTGGGCAACCCCGTGACTACATAACGGGTTTGAGACT
AT5G58420.1	513	0	DatasetCV	AAAGGCATTCCTTACCTGAACACTTACGATGGTCGCACCAT
AT1G17470.1	82	0	DatasetCV	TCTCTTCGCCGGAGATCGCCCTTCACCAATTCCACTATAGT
AT5G13850.1	420	0	DatasetCV	TATGTGATCTTTGGTGAGGCCAAGATAGAGGATTTGAGCTC
AT5G61780.1	1887	0	DatasetCV	CTCTCCTGGCTGCTGAAGCTCGTGCTATTGCTGGGAAGAAG
AT3G08530.1	5064	0	DatasetCV	TAAAGGACAAGCTTGAGGCACAAAAAGAGGTGAAGGCCAAA
AT1G56070.1	2612	0	DatasetCV	GGGATTGAAGGAAGCGATGACTCCACTATCTGAGTTCGAAG
AT1G78080.1	1223	0	DatasetCV	TCGGTGAATATAAACCTCTTCACTCCTCAGTCGACGCTAAG
AT1G11840.1	899	0	DatasetCV	TCATTCCTTGATCCAGATGGCTGGAAAACGGTTTTGGTGGA
AT1G48300.1	223	0	DatasetCV	GCAGCTGGAGCAGTTGAAAGCAGAGGAGAAGATATTGAAGA
AT5G32440.1	793	0	DatasetCV	CAGCATCTGAGGCAGCTAGTCACTCAATACCAGGAACAGTT
AT2G36290.1	970	0	DatasetCV	GGAGCTCGAGAATCTGTTCCCGAACAATGAAGGATCAGTGC
AT1G04250.1	537	0	DatasetCV	TAAAAGCTACGATGAGCTTTCTAATGCTTTGTCCAACATGT
AT3G16460.1	304	0	DatasetCV	ACGGCCCTTTCTGCTTACGGCAAATCGTTGAGTACGCAAGA
AT4G34050.1	372	0	DatasetCV	ACAATGGAGATCGGAGTTTACACTGGCTACTCTCTTCTCGC
AT4G11320.1	1176	0	DatasetCV	TCTCAAGAACTCGTTTTCTACGGATAAAGTTTCGGTTGCCT
AT4G00355.1	574	0	DatasetCV	TTCTCTGGACGATGAAAGAGCTATCGGTGGCTCACACGTGT
AT1G74030.1	1246	0	DatasetCV	AGTCACTGAGTCAATTCAAGCAGCACTTGACTCAAAAGCTG
AT5G48230.1	1109	0	DatasetCV	ATGCTGCAAAATTGAGGAAACTCCGTCCTAGTTTCAAAGAG
AT1G27770.1	2658	0	DatasetCV	AACTTCTTATCAGCCTGCCTCACTGGAAACGCGCCTCTGAC
AT1G72710.1	424	0	DatasetCV	ATGTGAAAACTAAGCATCCTCAGTTGCTGTATGAATCAAAG
AT5G48010.2	1713	0	DatasetCV	GGCTTAGTCCAGTGGAGTTCCTTGAAGACACAATCGTGGAG
AT4G35830.1	2607	0	DatasetCV	GAAGATGCTGAGACCCTTGGCCTAACGGGTCAGGAGCTTTA
AT2G36530.1	750	0	DatasetCV	GTGGGTTTGCACCAAACATTCAGGAGAACAAGGAGGGTCTT
AT2G37130.1	700	0	DatasetCV	CACTGCGTTAACCTAGTGCACCGGCTATACCCAACGATTGA
AT4G35830.1	1667	0	DatasetCV	CTCGGGGGATATCCATGAAGCTGTGGCTTCAGCAATAGTTG
AT3G10410.1	1755	0	DatasetCV	TTTCGTTATAAAATCAAACTCTGCTGACACCAAAAACATAA
AT3G30390.1	875	0	DatasetCV	CGATTCTTTGAAATTTACATCGGCCTTATCCGTGGCTCTGG
AT3G19450.1	1462	0	DatasetCV	AAATGGTTCAAACACGAATGCTTTGGCTTTATTTTTTTCTA
AT3G04720.1	502	0	DatasetCV	ATAGTGGACCAATGCAGCAACGGAGGCTTGGATTTGGATGT
AT4G39090.1	470	0	DatasetCV	GTTCTCAGATCTGACTCGGTCTGAGTTCCGTAAGAAGCACT
AT2G02960.1	473	0	DatasetCV	ACCTGGATATACCGCTCCACCACCTCCACTTCAGCCTGAAG
AT2G07727.1	71	0	DatasetCV	GAAATTTAGGTCTCTGCCCGCTTGAAAGATTCTTCTTTCCT
[truncated: 11,663 more rows]
