# Supplementary material for: Transcriptome-Wide Annotation of m5C RNA Modifications Using Machine Learning
Source: Front Plant Sci. 2018 Apr 18;9:519. doi: 10.3389/fpls.2018.00519 (PMC5915569; doi:10.3389/fpls.2018.00519)
Supplement: Table S2 — The feature importance measured using the information gain approach at the window size of 11-nt (Lu = Ld = 5). [file Table2.XLSX]

## Sheet: Feature importance
Encoding strategy	Feature	Feature importance
k-mer	GG	0.0714948
PseDNC	PseDNC-11	0.0711661
k-mer	G	0.0671394
Binary	-1_G	0.0488633
k-mer	GGC	0.0437224
k-mer	GGG	0.0348606
Binary	-2_G	0.033973
PseDNC	PseDNC-16	0.0298571
PseDNC	PseDNC-14	0.0283856
PseDNC	PseDNC-15	0.0274452
k-mer	AGG	0.0259185
PseDNC	PseDNC-6	0.0236192
PseDNC	PseDNC-5	0.0216731
PseDNC	PseDNC-8	0.0215047
k-mer	TC	0.0214711
k-mer	GC	0.0190714
PseDNC	PseDNC-1	0.0189385
PseDNC	PseDNC-9	0.0180614
k-mer	C	0.0178351
PseDNC	PseDNC-7	0.0172376
Binary	-1_T	0.0170249
PseDNC	PseDNC-13	0.0169302
PseDNC	PseDNC-2	0.0164997
k-mer	T	0.0164514
PseDNC	PseDNC-3	0.0162361
PseDNC	PseDNC-12	0.015594
PseDNC	PseDNC-10	0.0155156
PseDNC	PseDNC-4	0.0149904
k-mer	GCA	0.0134827
k-mer	GAG	0.0128327
k-mer	CC	0.0121244
k-mer	TGG	0.0118181
k-mer	AG	0.011467
k-mer	GCG	0.0109312
k-mer	GGA	0.0109222
Binary	-2_T	0.0098209
k-mer	CT	0.00930387
k-mer	CGG	0.00898679
Binary	-1_C	0.00839697
Binary	-2_C	0.00809532
Binary	-3_G	0.00802452
k-mer	TCT	0.00772791
k-mer	TCC	0.00748243
k-mer	TT	0.00584594
k-mer	CCT	0.00577254
k-mer	TCA	0.0057692
k-mer	TTC	0.00551435
k-mer	AC	0.00550187
k-mer	CTC	0.00505723
k-mer	2_G	0.00495246
k-mer	CCA	0.00491996
k-mer	ATC	0.00462151
k-mer	1_G	0.00374905
k-mer	1_C	0.00370716
k-mer	ACC	0.00358942
k-mer	AT	0.00355331
Binary	-1_A	0.00355134
k-mer	TA	0.00348071
k-mer	GA	0.00335561
k-mer	GTG	0.00313545
k-mer	TAC	0.00312857
k-mer	CCC	0.00309958
k-mer	GTC	0.00298993
k-mer	2_T	0.00272017
k-mer	ACT	0.002712
k-mer	3_G	0.00266342
Binary	-3_C	0.00237756
k-mer	CTT	0.0023655
PseDNC	PseDNC-20	0.00214513
PseDNC	PseDNC-22	0.00203833
Binary	-4_C	0.00201956
PseDNC	PseDNC-17	0.0019608
k-mer	1_T	0.0019195
k-mer	ATA	0.00180892
k-mer	TTA	0.00179313
k-mer	TTT	0.00173113
k-mer	CAC	0.00170222
Binary	-3_T	0.00168655
Binary	-2_A	0.00166592
k-mer	CCG	0.00161935
k-mer	CAT	0.00161833
k-mer	AAC	0.00153433
k-mer	ATT	0.00146367
k-mer	CAG	0.00138573
k-mer	4_G	0.00130954
Binary	-4_G	0.00126525
k-mer	ACA	0.00126261
k-mer	GTT	0.0012283
k-mer	CA	0.00113855
k-mer	AAG	0.00109614
k-mer	1_A	0.00106186
k-mer	AAT	0.000970169
k-mer	TG	0.000966104
PseDNC	PseDNC-19	0.000939516
k-mer	3_C	0.000921521
k-mer	TCG	0.000907869
k-mer	CG	0.00088994
Binary	-4_T	0.000884366
k-mer	TAT	0.000875713
Binary	-5_A	0
Binary	-5_T	0
Binary	-5_G	0
Binary	-5_C	0
Binary	-4_A	0
Binary	-3_A	0
Binary	0_A	0
Binary	0_T	0
Binary	0_G	0
Binary	0_C	0
k-mer	2_A	0
k-mer	2_C	0
k-mer	3_A	0
k-mer	3_T	0
k-mer	4_A	0
k-mer	4_T	0
k-mer	4_C	0
k-mer	5_A	0
k-mer	5_T	0
k-mer	5_G	0
k-mer	5_C	0
k-mer	A	0
k-mer	AA	0
k-mer	GT	0
k-mer	AAA	0
k-mer	TAA	0
k-mer	GAA	0
k-mer	CAA	0
k-mer	GTA	0
k-mer	CTA	0
k-mer	AGA	0
k-mer	TGA	0
k-mer	CGA	0
k-mer	GAT	0
k-mer	AGT	0
k-mer	TGT	0
k-mer	GGT	0
k-mer	CGT	0
k-mer	GCT	0
k-mer	TAG	0
k-mer	ATG	0
k-mer	TTG	0
k-mer	CTG	0
k-mer	ACG	0
k-mer	GAC	0
k-mer	AGC	0
k-mer	TGC	0
k-mer	CGC	0
k-mer	GCC	0
PseDNC	PseDNC-18	0
PseDNC	PseDNC-21	0
