# Supplementary material for: Transcriptome-Wide Annotation of m5C RNA Modifications Using Machine Learning
Source: Front Plant Sci. 2018 Apr 18;9:519. doi: 10.3389/fpls.2018.00519 (PMC5915569; doi:10.3389/fpls.2018.00519)
Supplement: Table S5 — Enriched pathways of genes containing m5C modifications at 4-nt downstream of the translational start site. [file Table5.XLSX]

## Sheet: sheet1
Database	PathwayID	Pathway	p-value	Enriched gene number	Genes
AraCyc	PWY-5097	L-lysine biosynthesis VI	0.000365432	5	AT3G59890/AT5G52100/AT3G14390/AT5G11880/AT5G13280
KEGG	ath00480	Glutathione metabolism	0.000162098	15	AT1G02920/AT1G02930/AT1G17170/AT1G27130/AT1G27140/AT1G78340/AT2G02930/AT2G29420/AT2G29460/AT2G29490/AT2G31570/AT3G24170/AT4G02520/AT4G08390/AT4G35970
	ath00510	N-Glycan biosynthesis	0.0255569	6	AT1G51590/AT2G05320/AT2G41490/AT2G47760/AT3G21160/AT4G38240
	ath04070	Phosphatidylinositol signaling system	0.0435415	8	AT1G66410/AT2G27030/AT2G41110/AT3G43810/AT3G56800/AT4G26770/AT5G21274/AT5G37780
