# Supplementary material for: Transcriptome-Wide Annotation of m5C RNA Modifications Using Machine Learning
Source: Front Plant Sci. 2018 Apr 18;9:519. doi: 10.3389/fpls.2018.00519 (PMC5915569; doi:10.3389/fpls.2018.00519)
Supplement: Table S6 — The performance of m5C predictors on DatasetHT using different encoding schemes. [file Table6.XLSX]

## Sheet: Sheet1
	Threshold	Sn	Sp	Pr	Acc	MCC	F1
PEA-m5C(PseDNC)	0.891	0.21	1	1	0.605	0.343	0.347
	0.765	0.54	0.96	0.93	0.75	0.551	0.684
	0.622	0.75	0.89	0.872	0.82	0.646	0.806
	0.484	0.86	0.84	0.843	0.85	0.7	0.851
PEA-m5C(PseDNC+K-mer)	0.891	0.27	1	1	0.635	0.395	0.425
	0.765	0.63	0.95	0.926	0.79	0.612	0.75
	0.622	0.79	0.89	0.878	0.84	0.683	0.832
	0.484	0.88	0.85	0.854	0.865	0.73	0.867
PEA-m5C(PseDNC+K-mer+Binary)	0.891	0.33	1	1	0.665	0.445	0.496
	0.765	0.72	0.95	0.935	0.835	0.688	0.814
	0.622	0.86	0.9	0.896	0.88	0.761	0.878
	0.484	0.9	0.86	0.865	0.88	0.761	0.882
iRNAm5C-PseDNC*	0.891	0.01	1	1	0.505	0.071	0.02
	0.765	0.23	0.885	0.667	0.558	0.152	0.342
	0.622	0.54	0.806	0.735	0.673	0.359	0.623
	0.484	0.76	0.738	0.744	0.749	0.498	0.751
